# Supplementary material
Source: PubMed Central journal article supplement (PMC1817633)

BU\_HU90\_0.025\_chr1

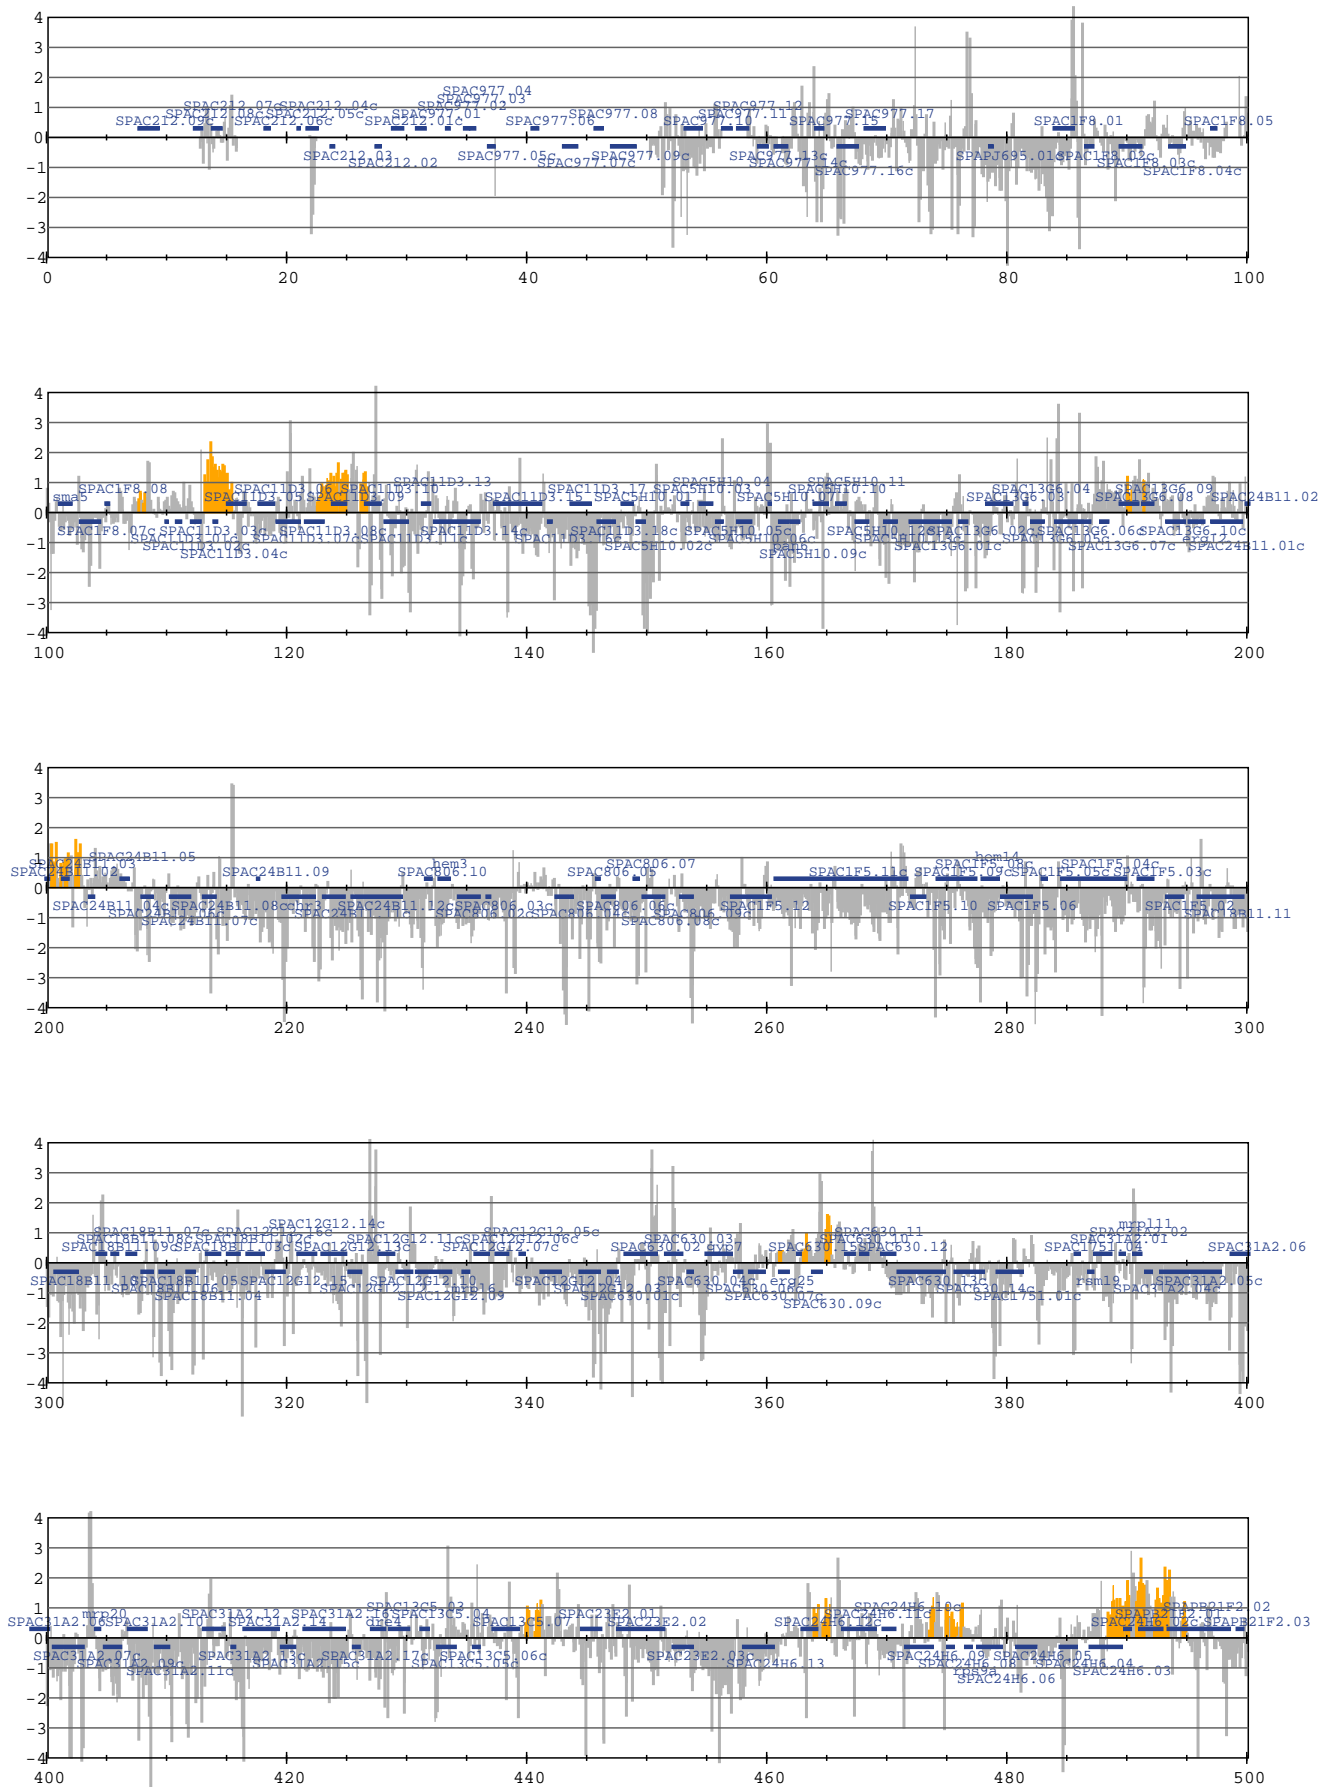

BU\_HU90\_0.025\_chr1

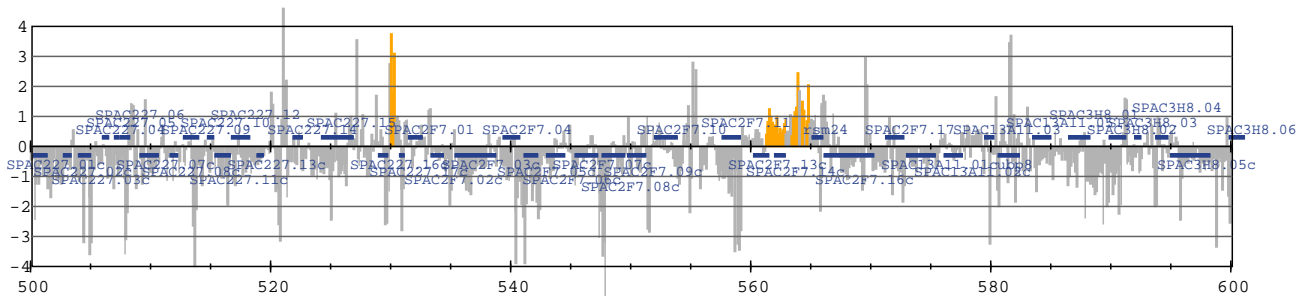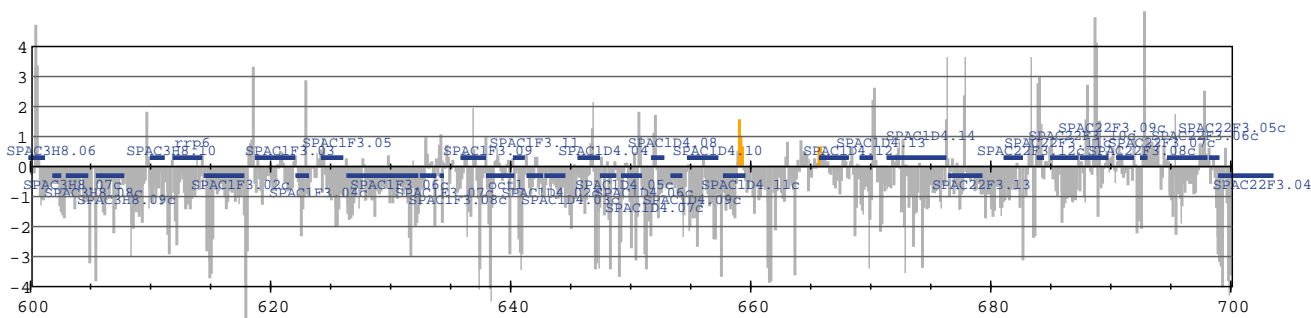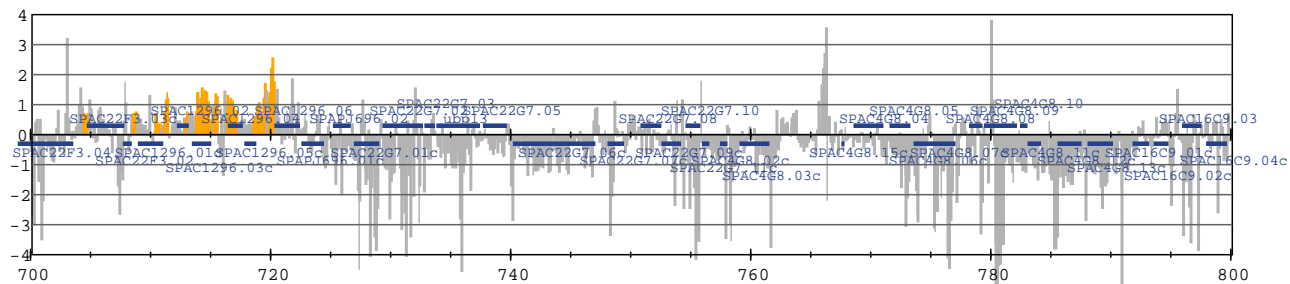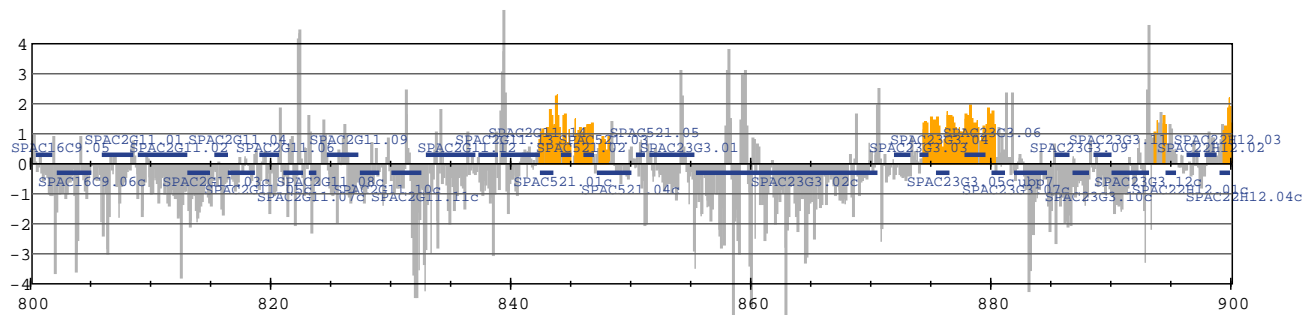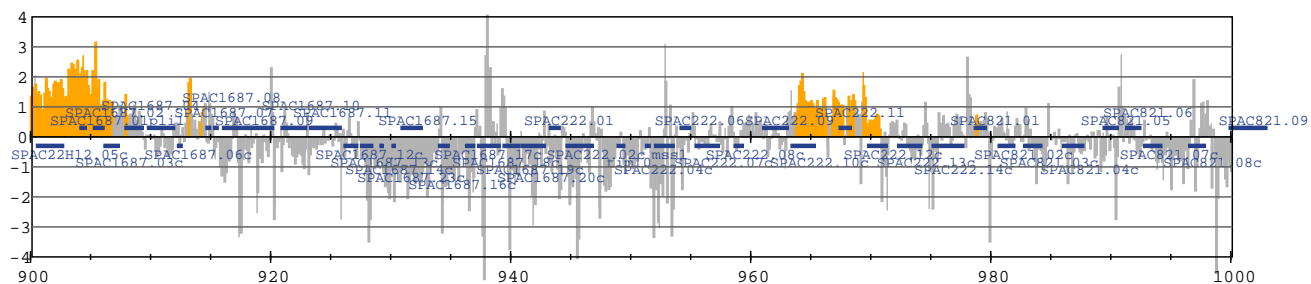











BU\_HU90\_0.025\_chr1

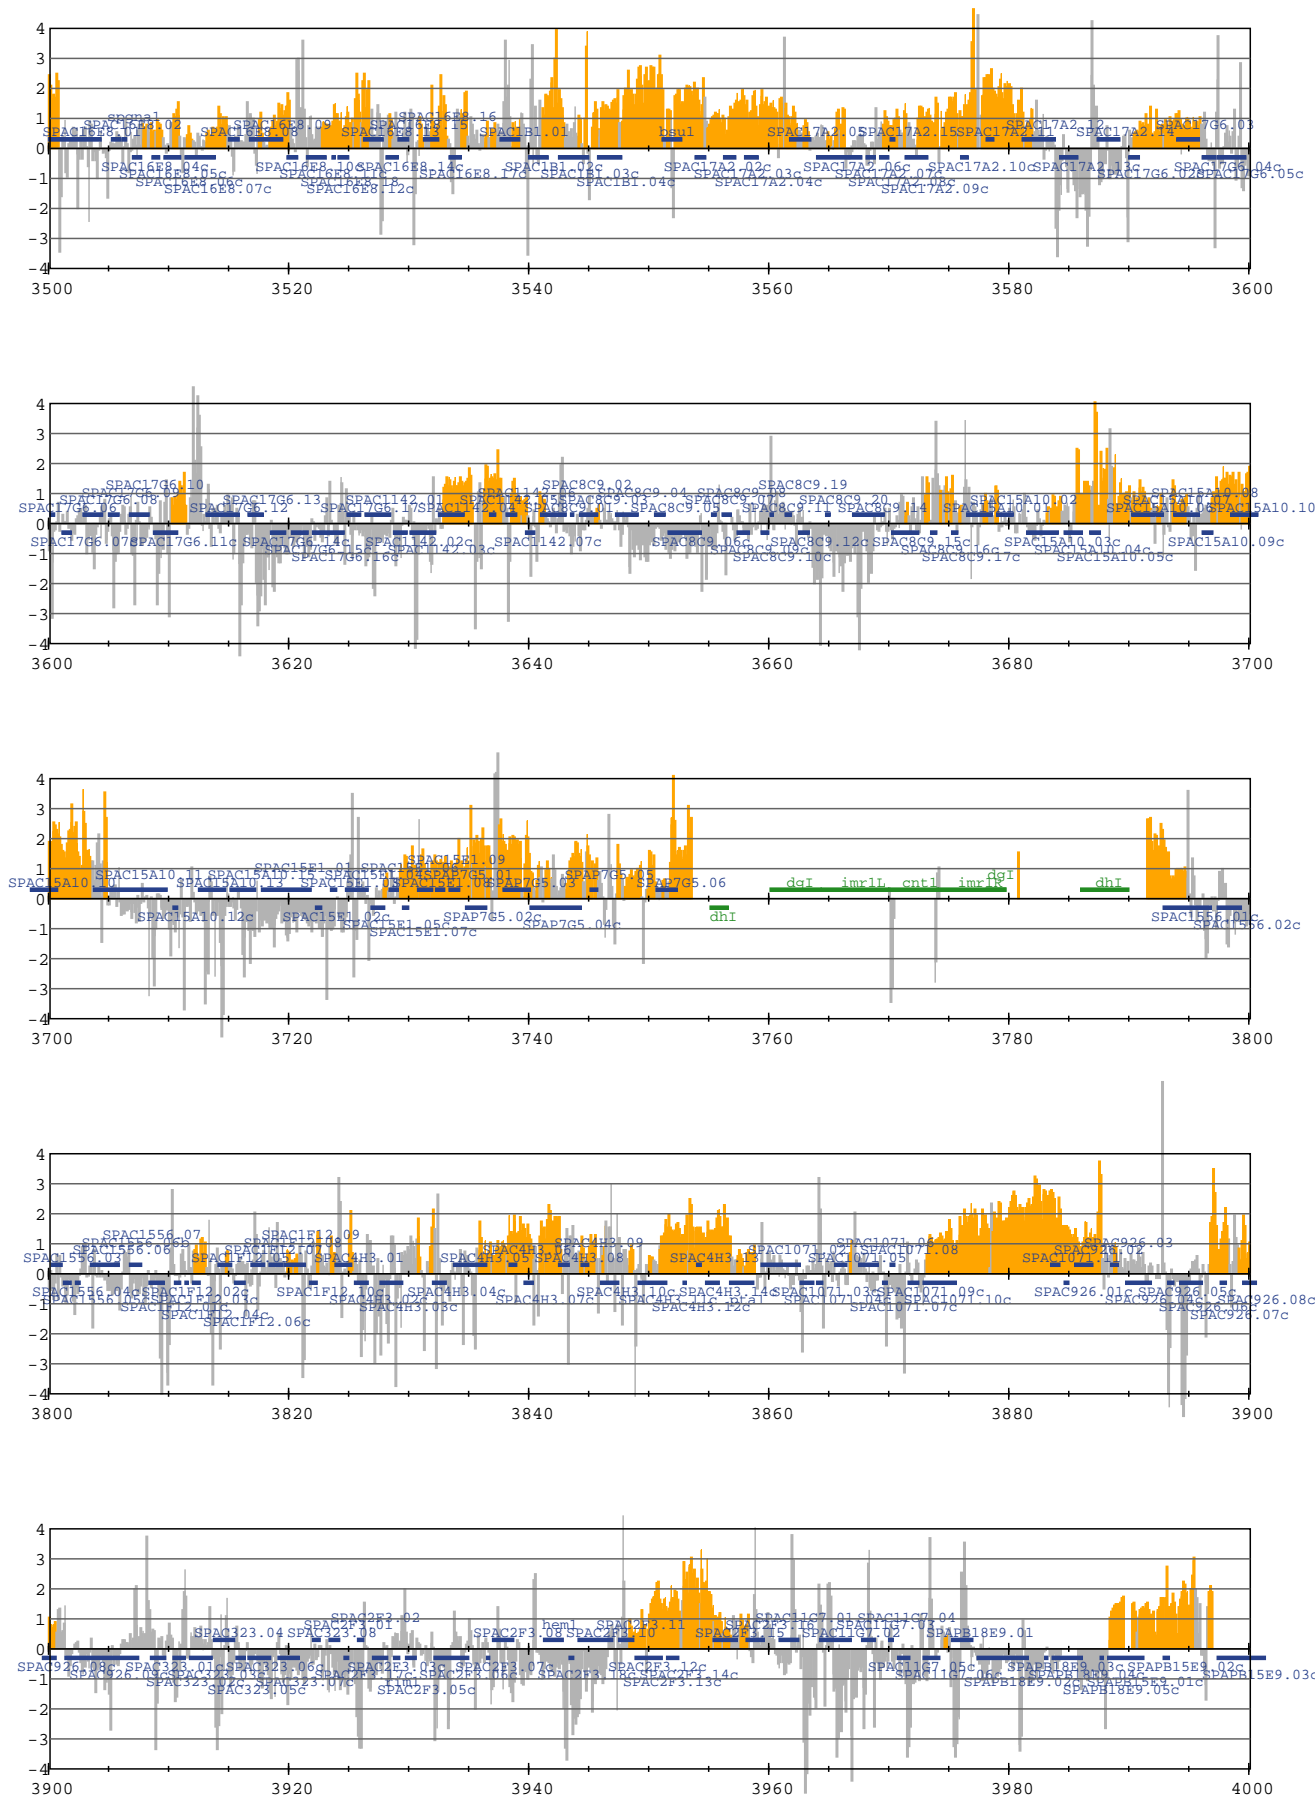





BU\_HU90\_0.025\_chr1

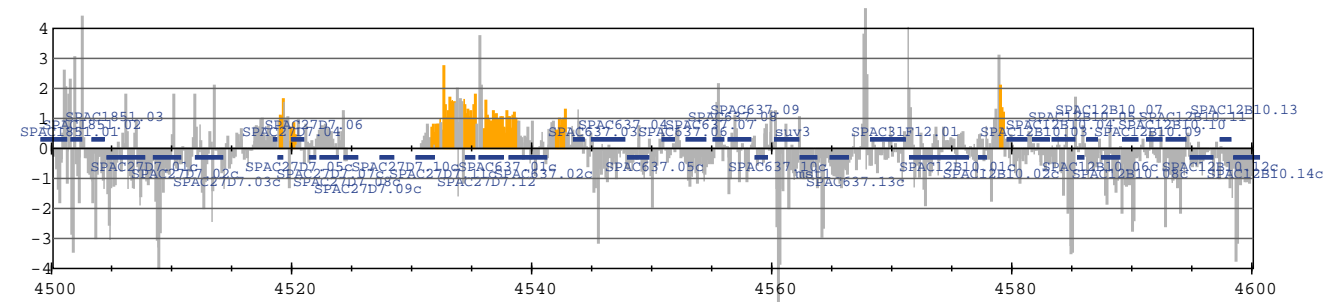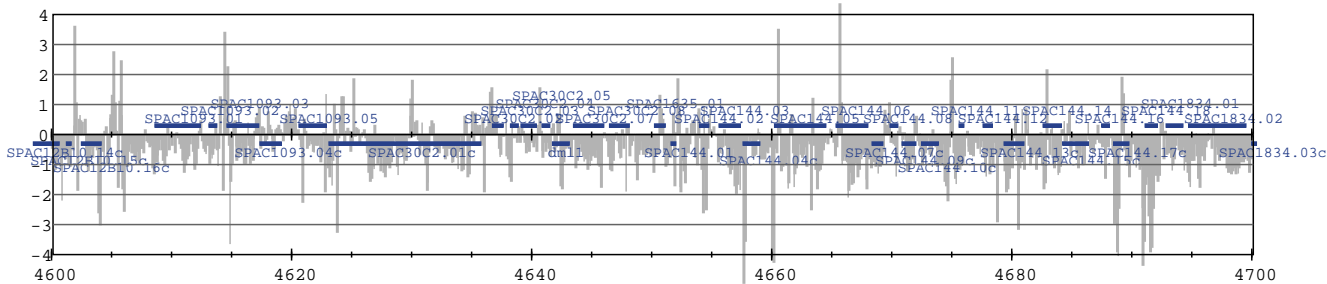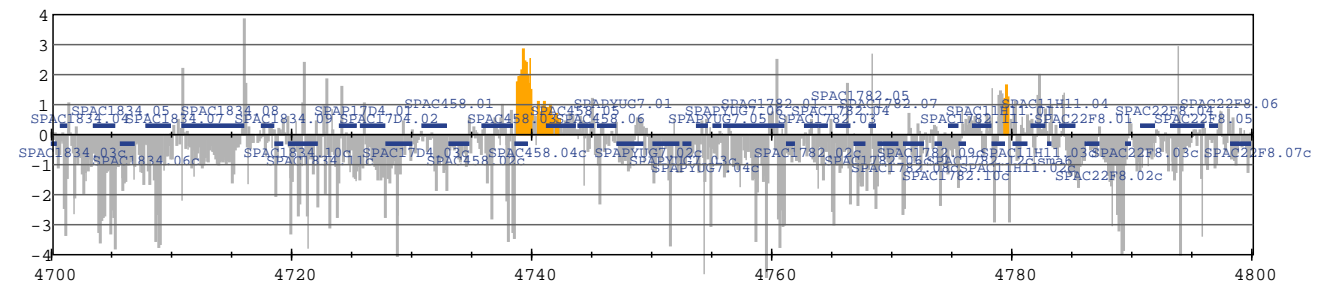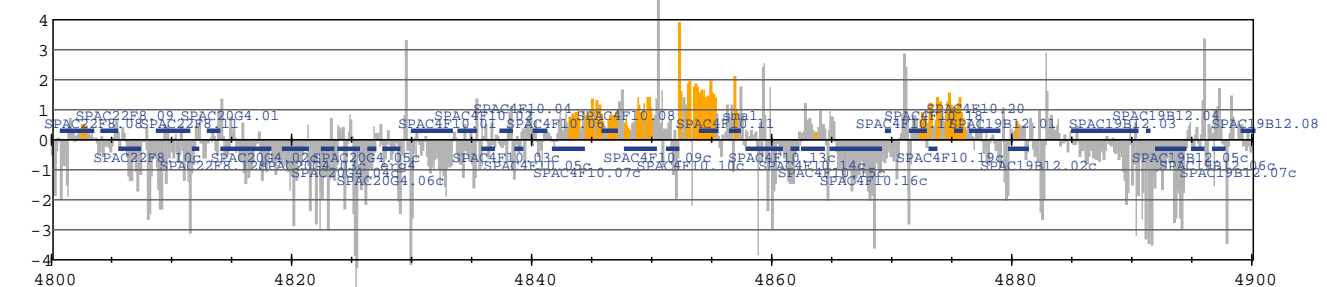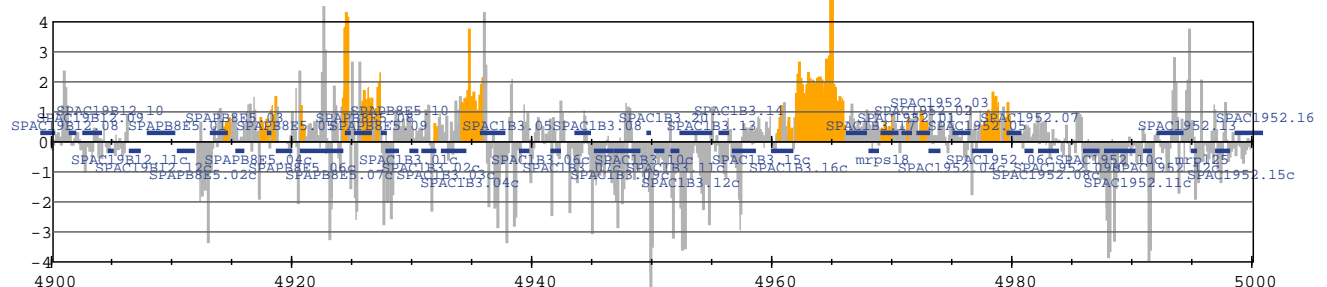



BU\_HU90\_0.025\_chr1

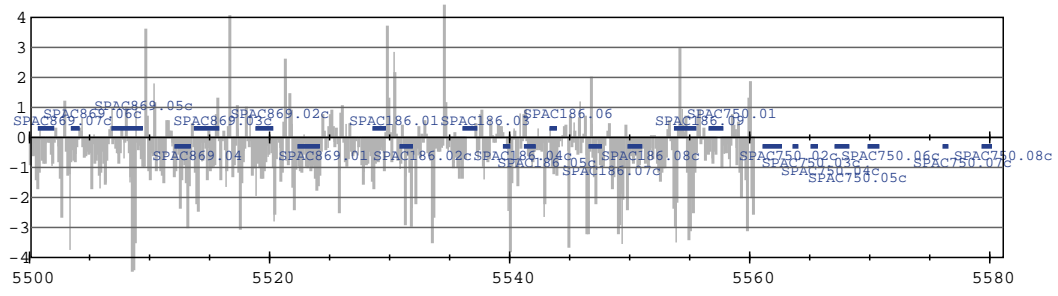



BU\_HU90\_0.025\_chr2

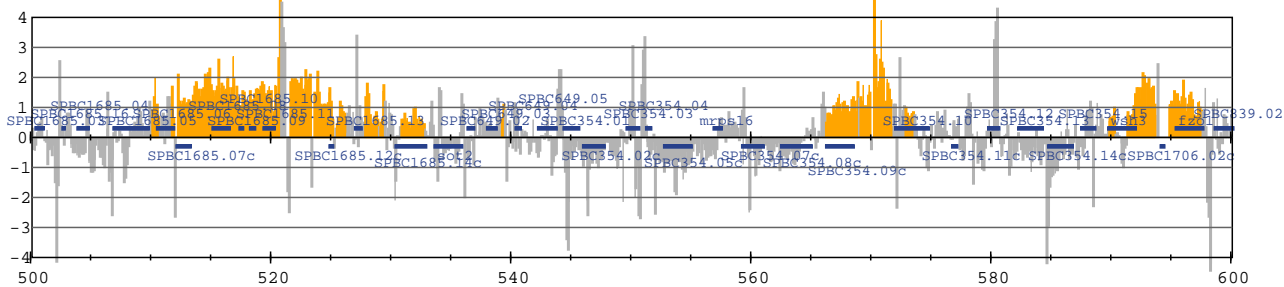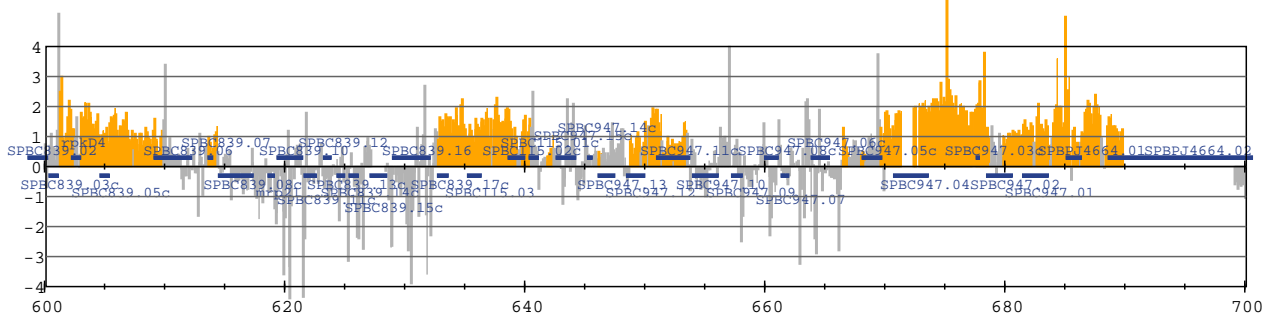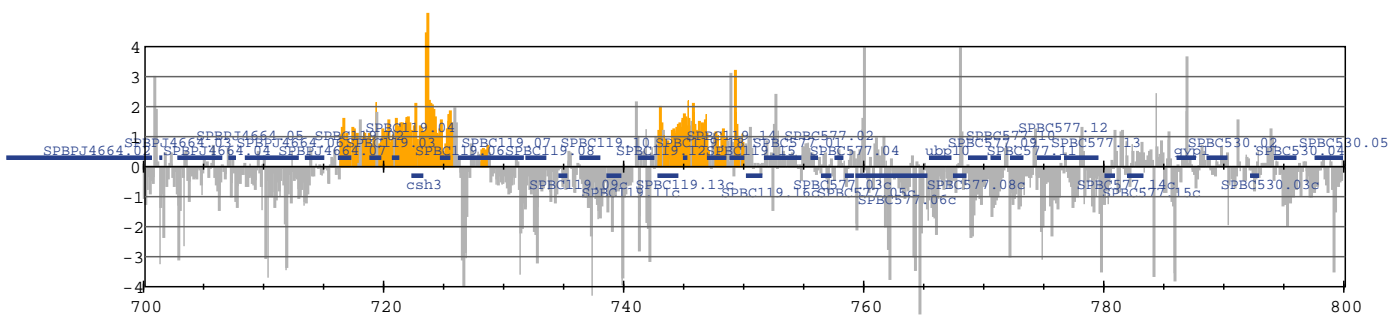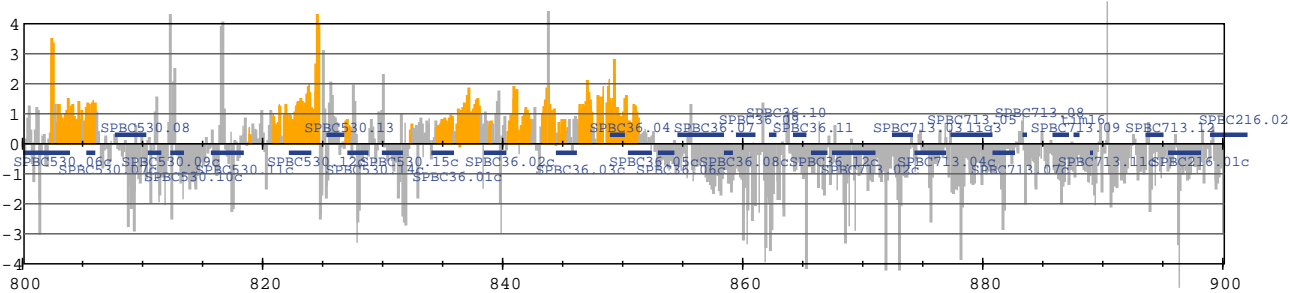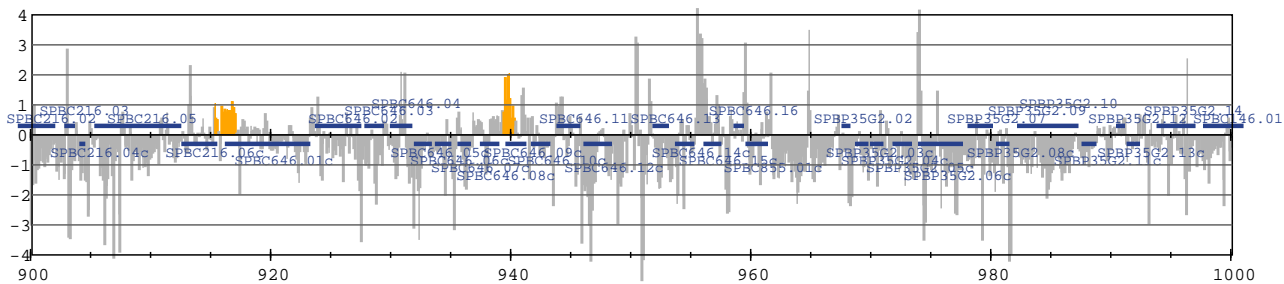

BU\_HU90\_0.025\_chr2

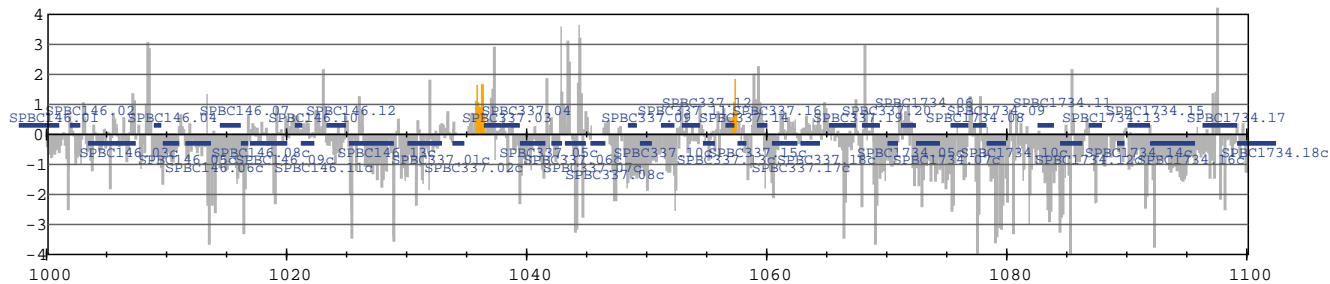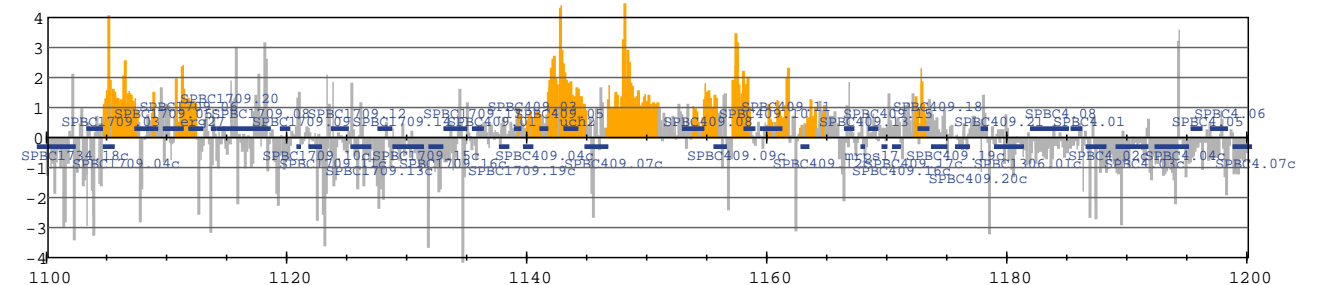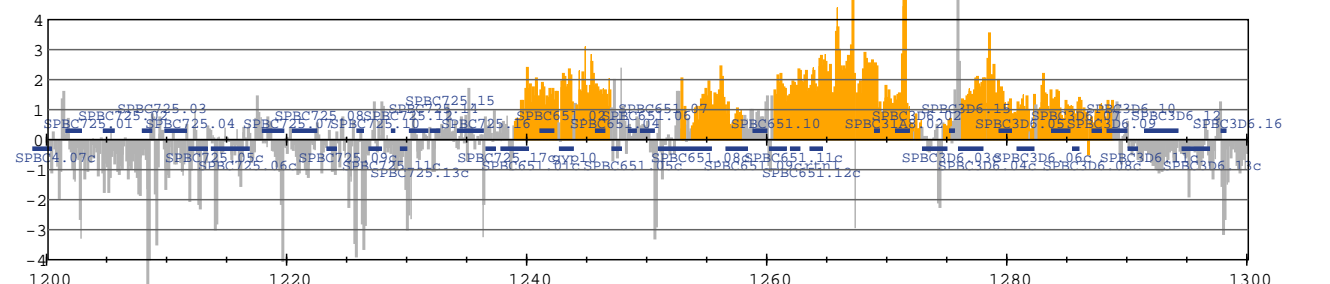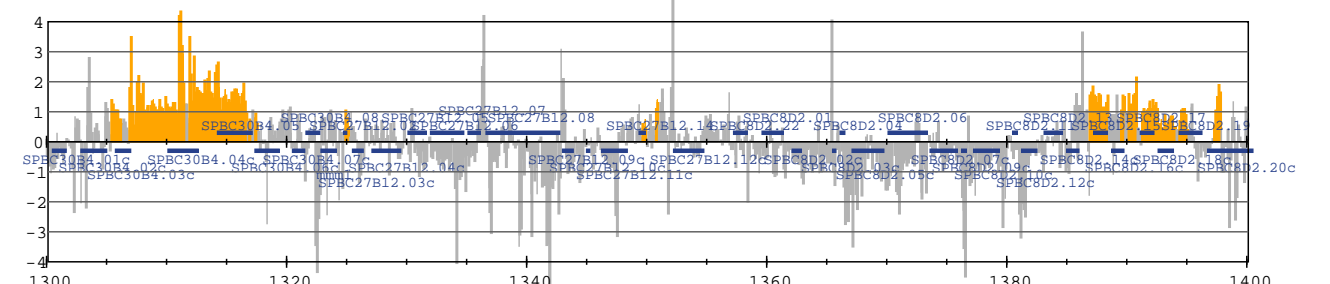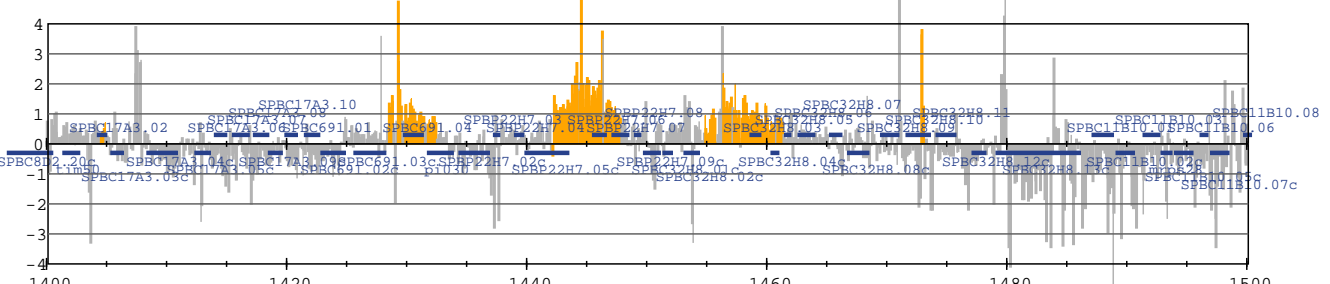









BU\_HU90\_0.025\_chr2

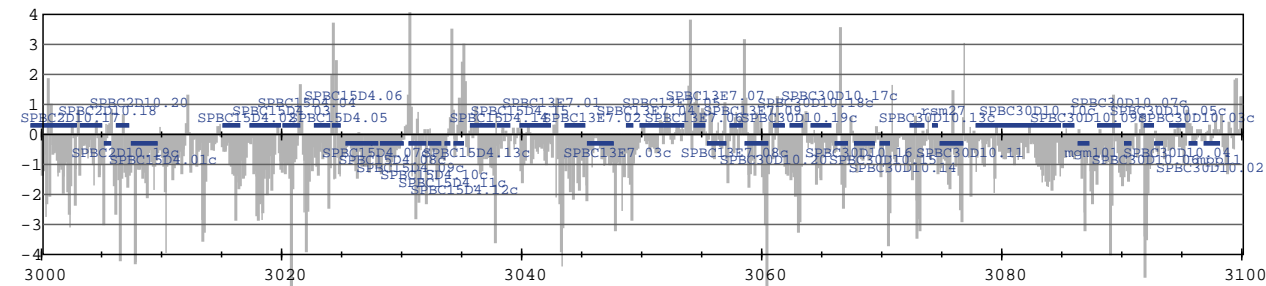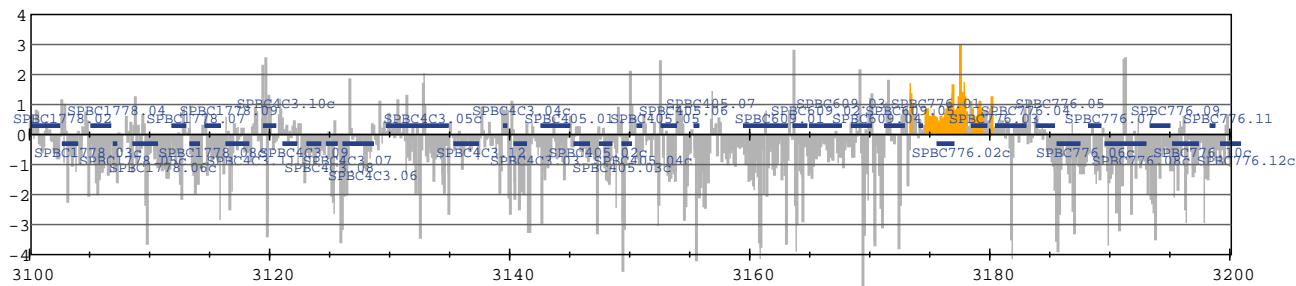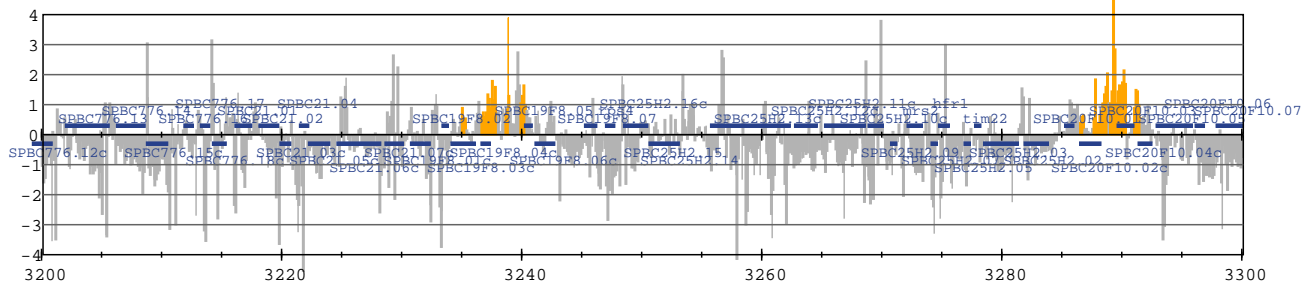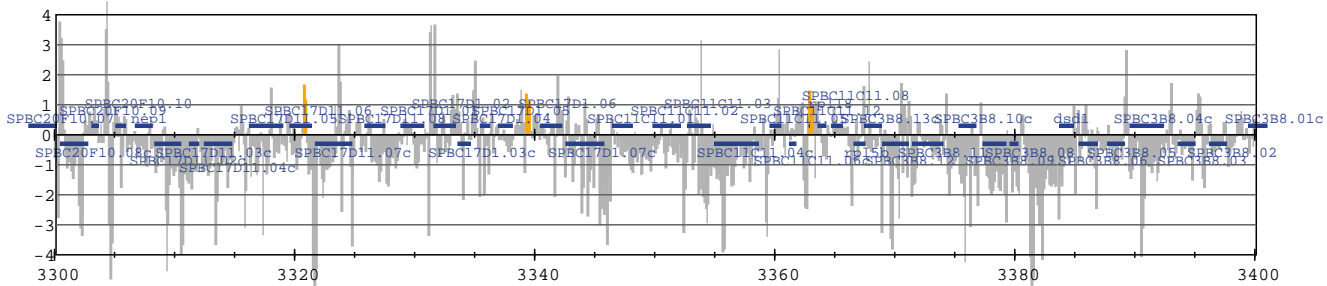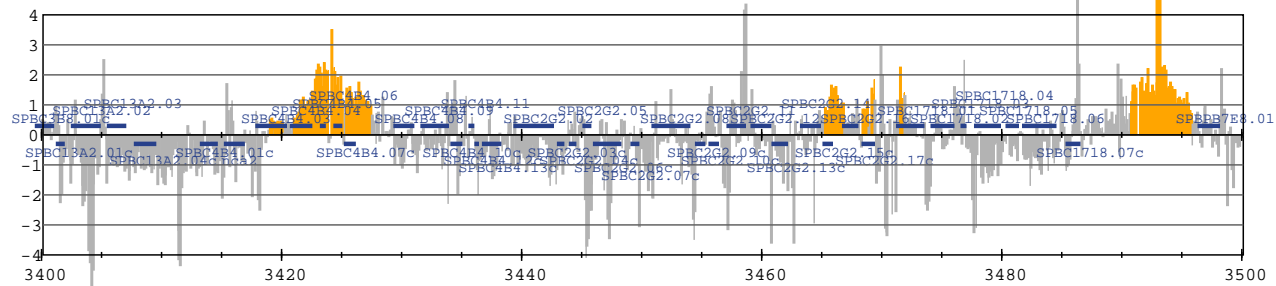



BU\_HU90\_0.025\_chr2

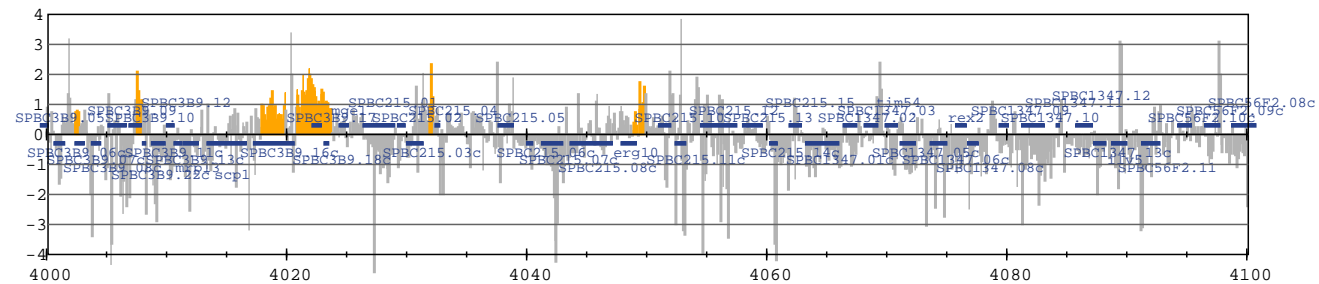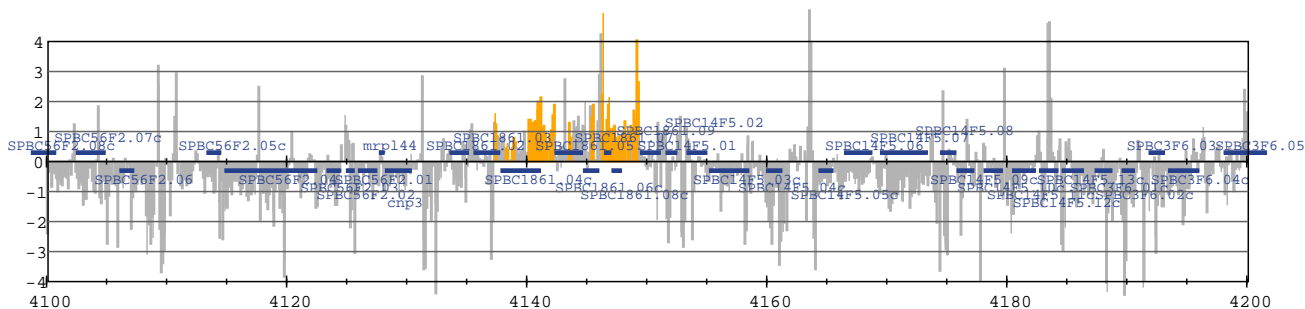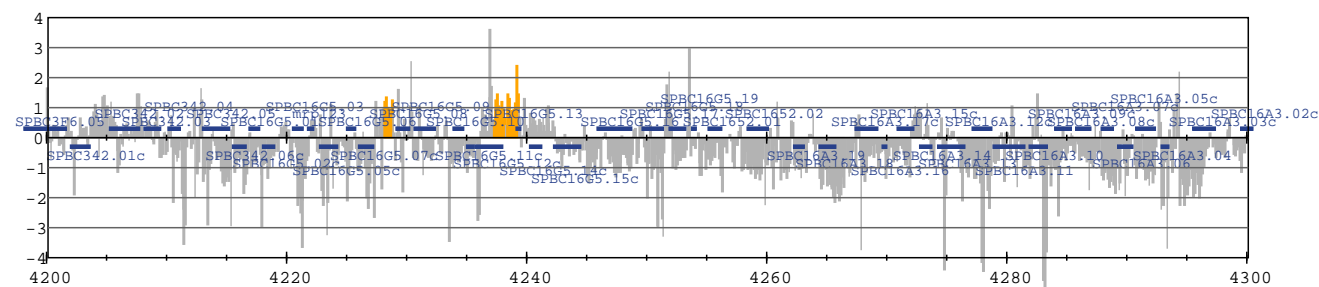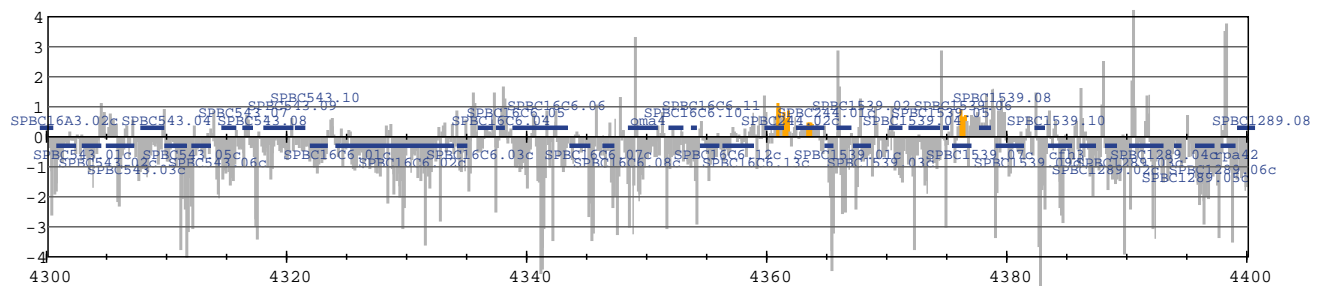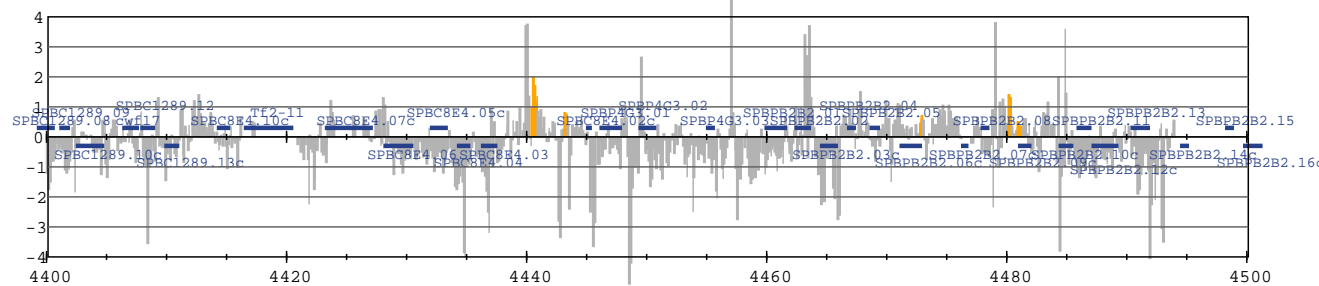

BU\_HU90\_0.025\_chr2

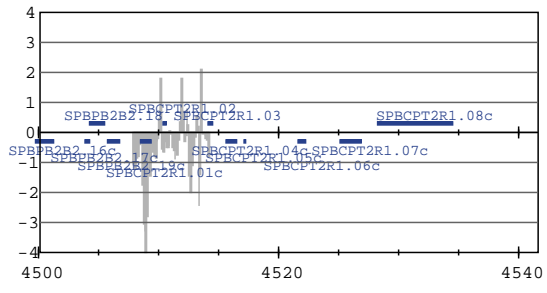



BU\_HU90\_0.025\_chr3

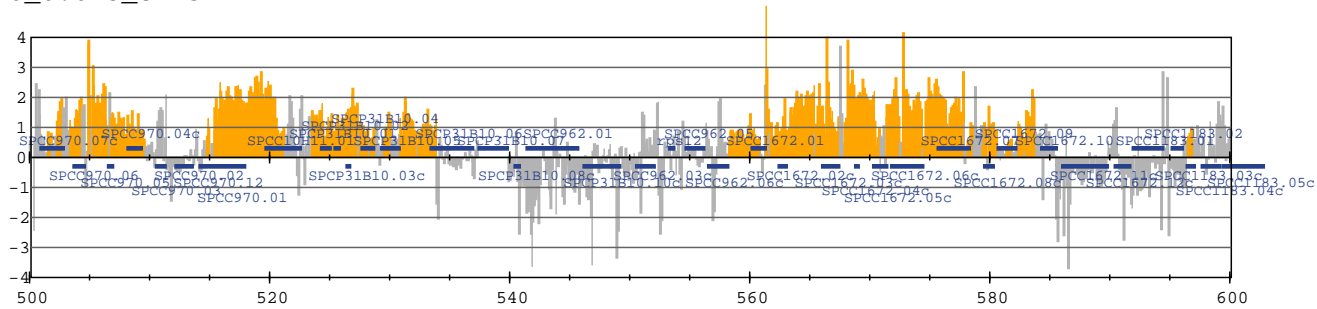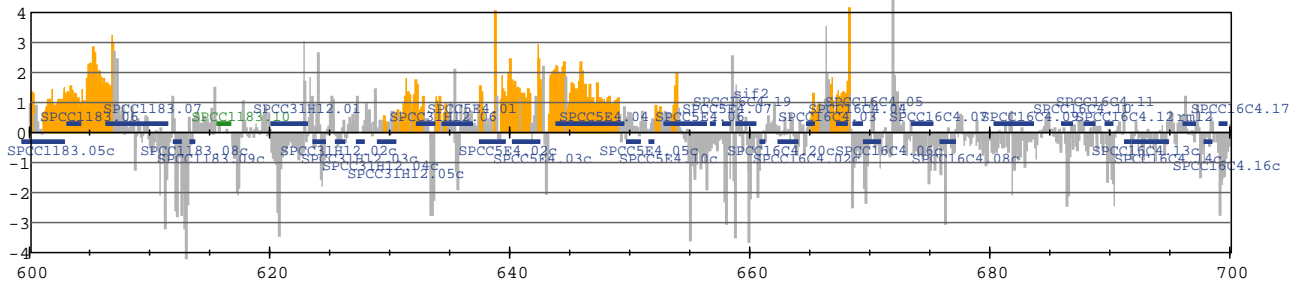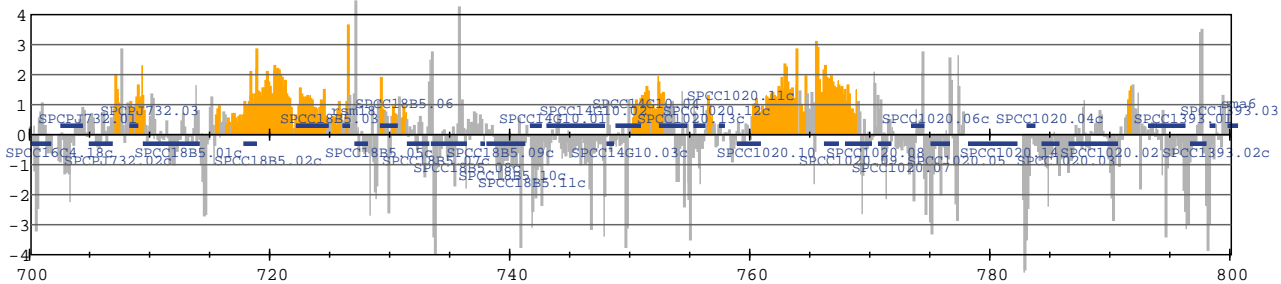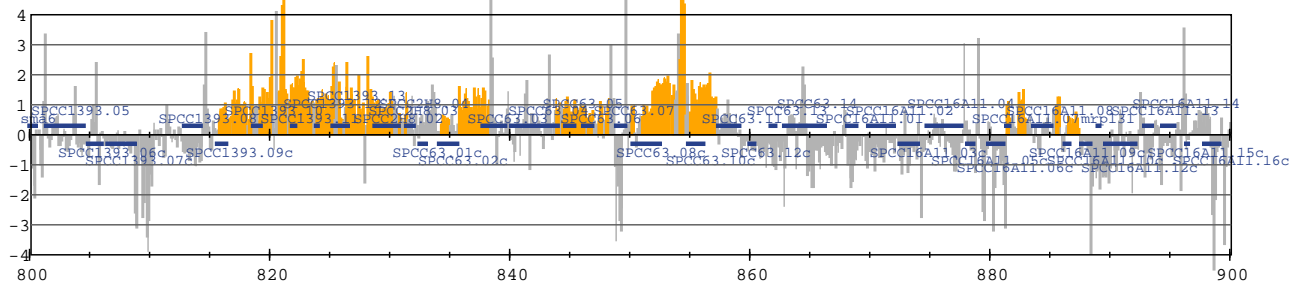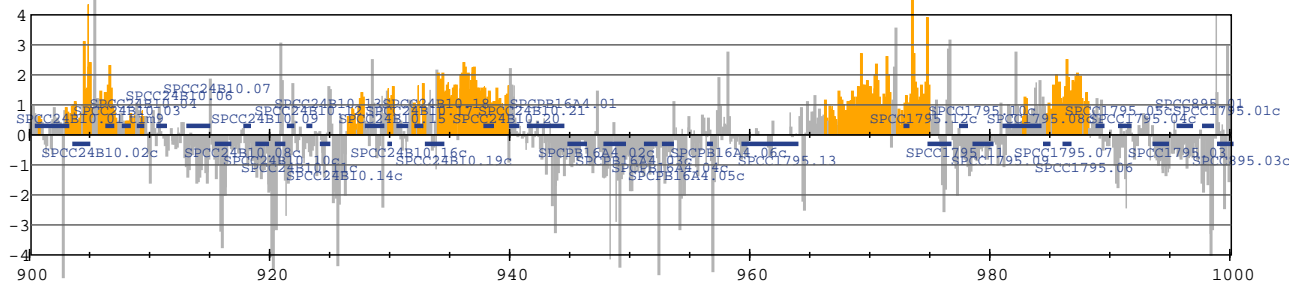





BU\_HU90\_0.025\_chr3

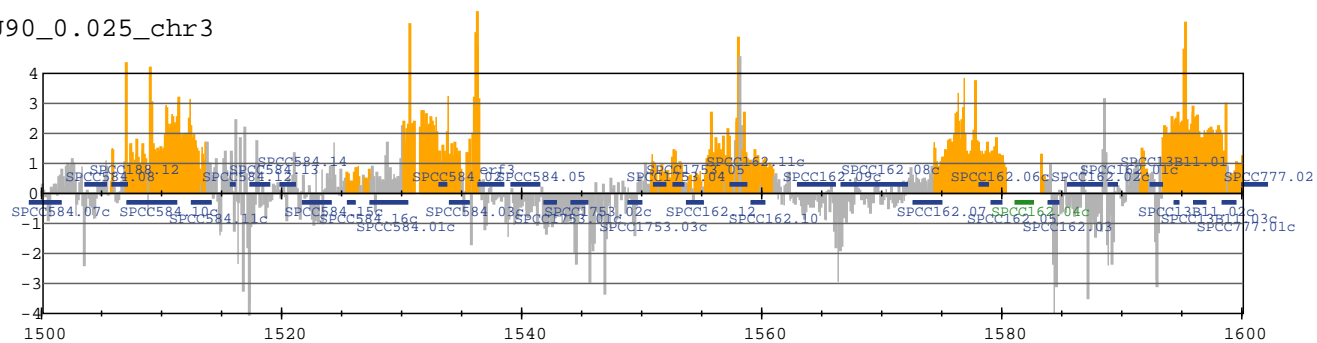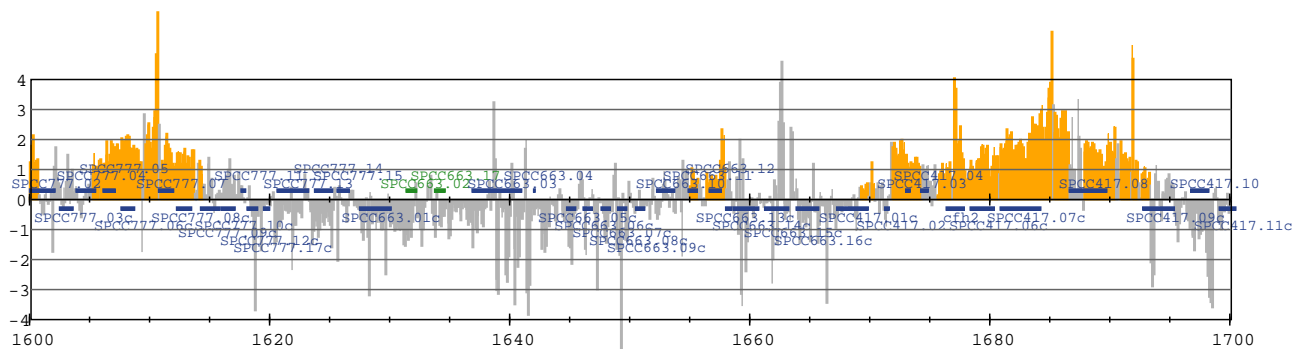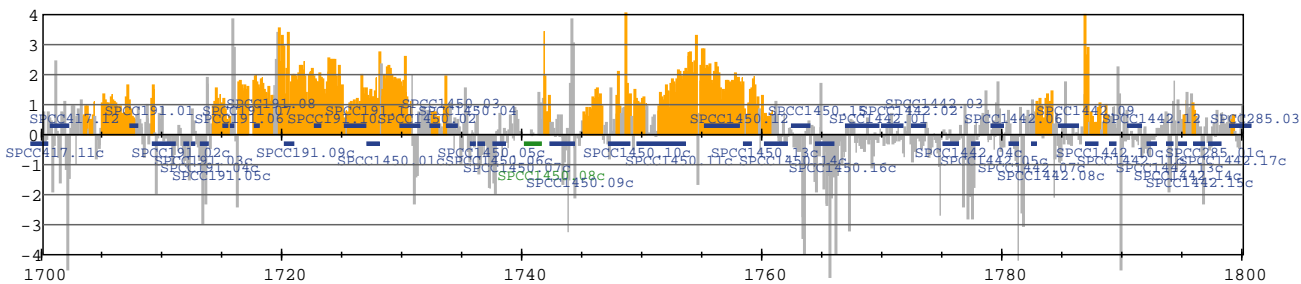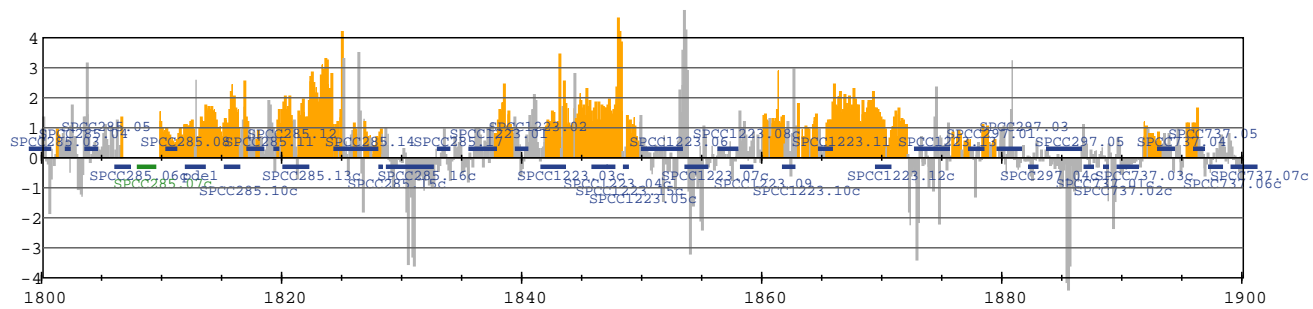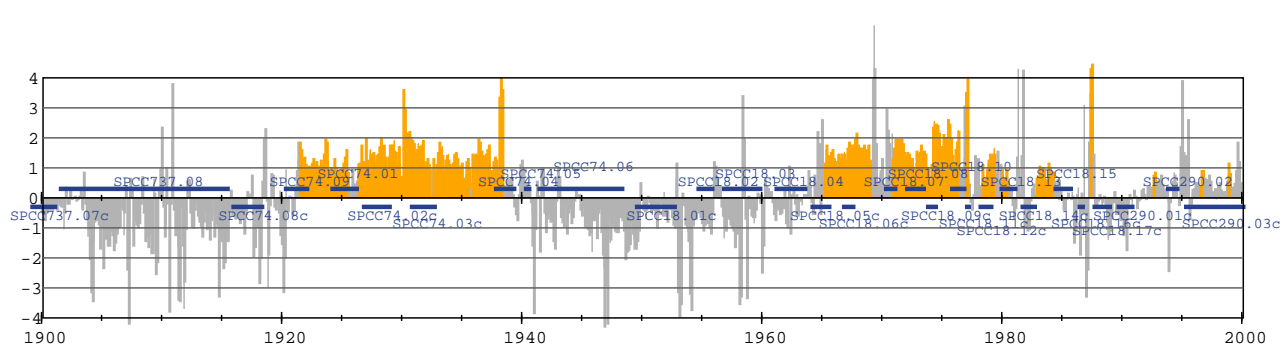

Supplement: 7601585s6.pdf [file 7601585s6.pdf]
