# Supplementary material
Source: PubMed Central journal article supplement (PMC1817633)

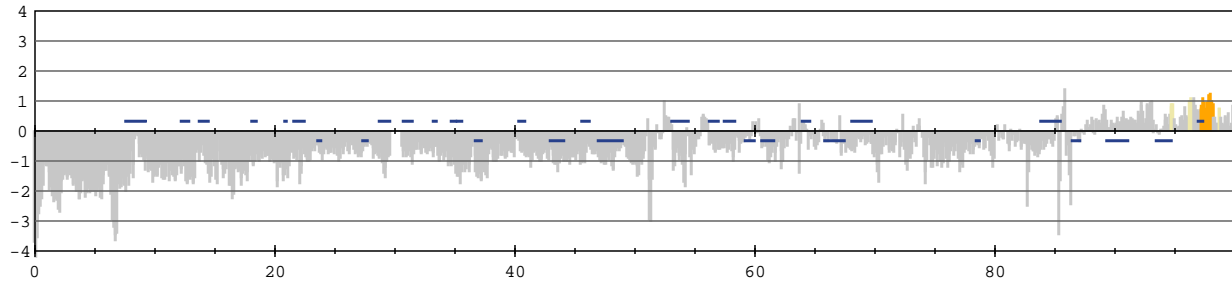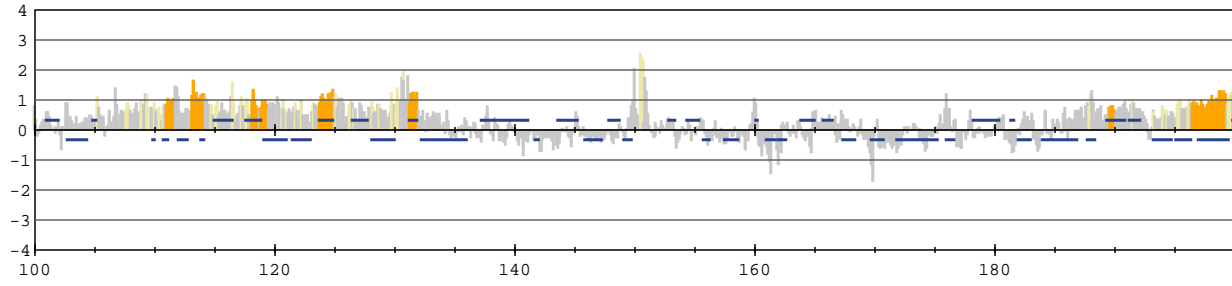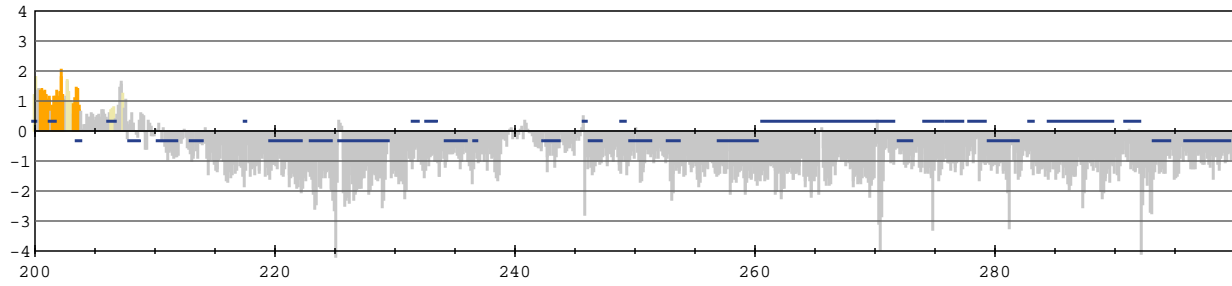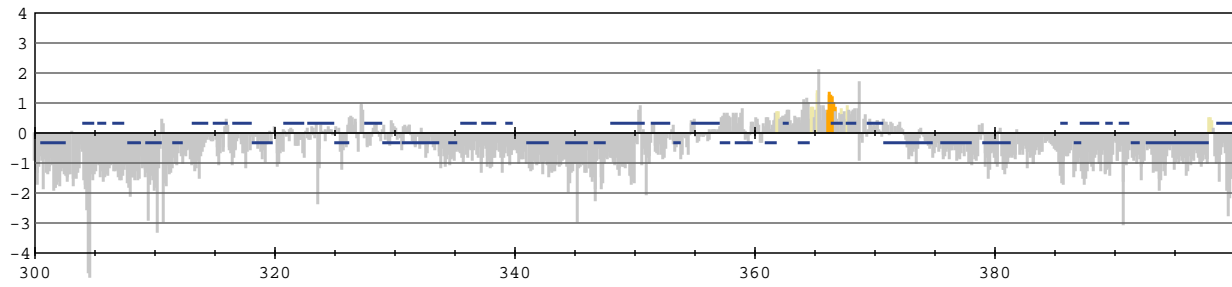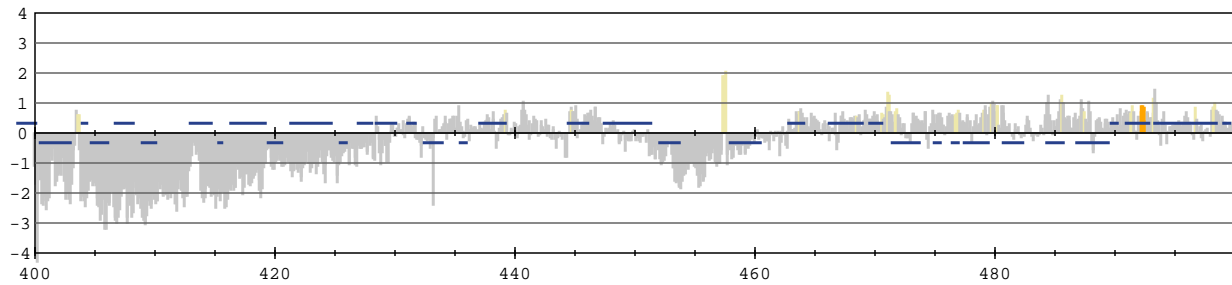

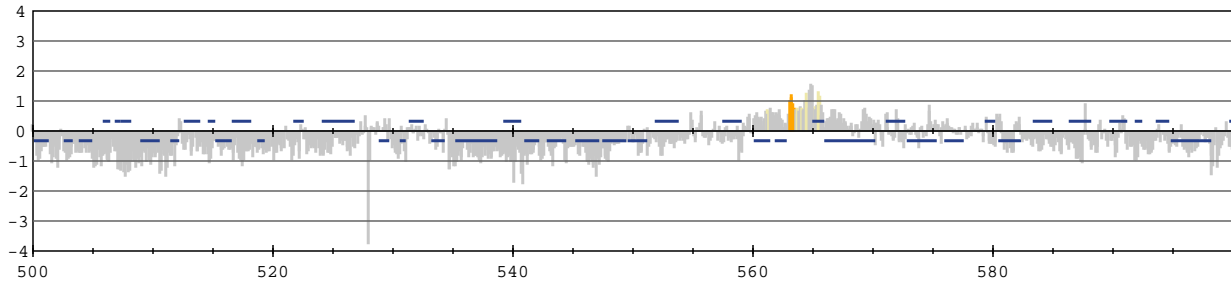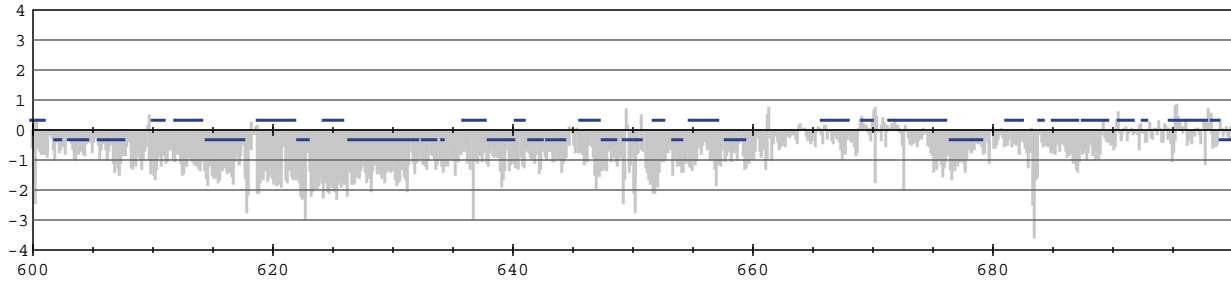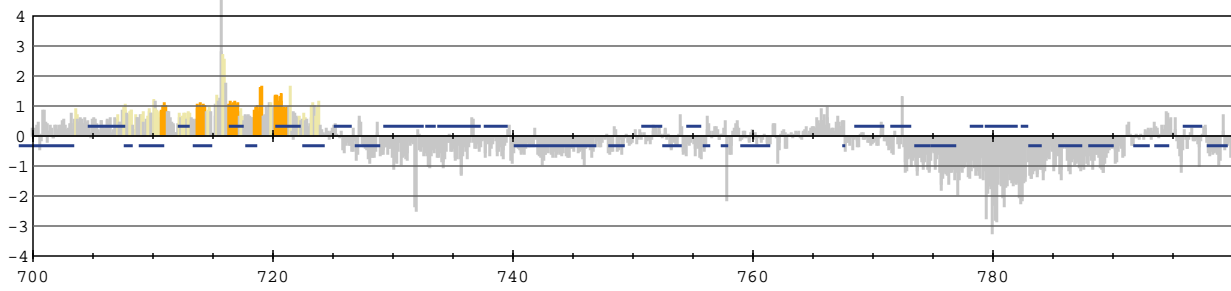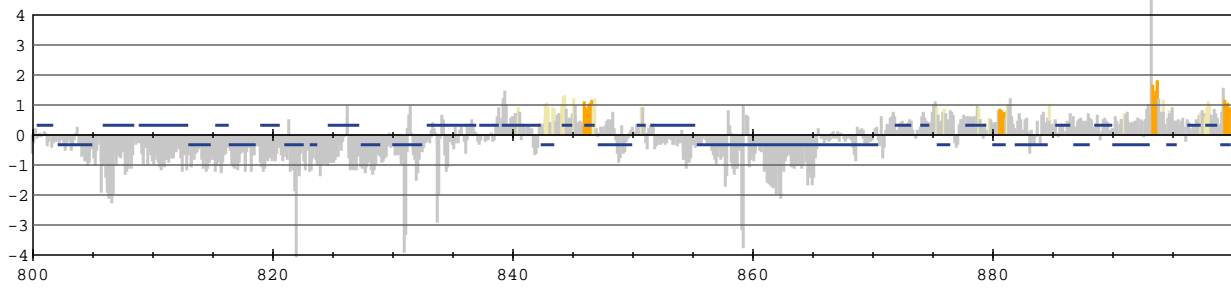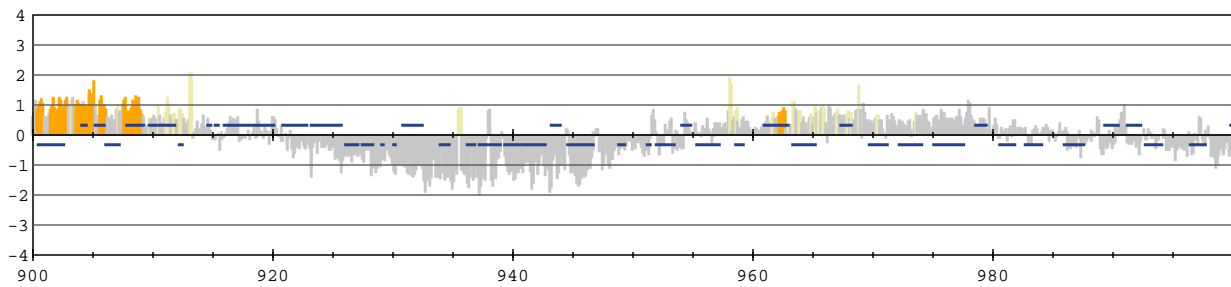

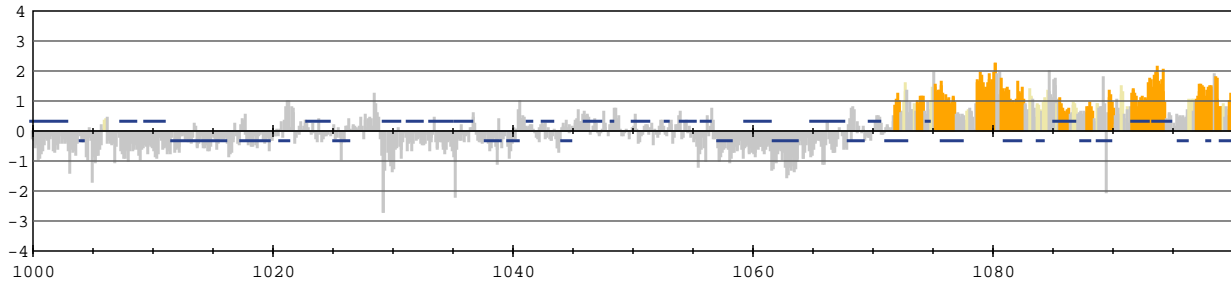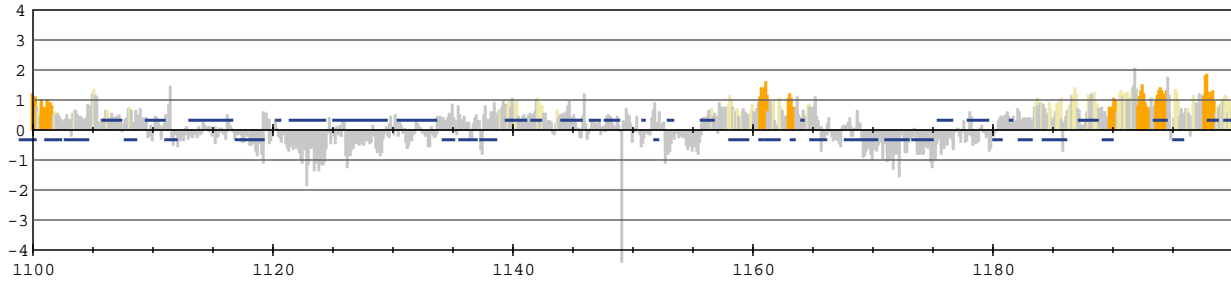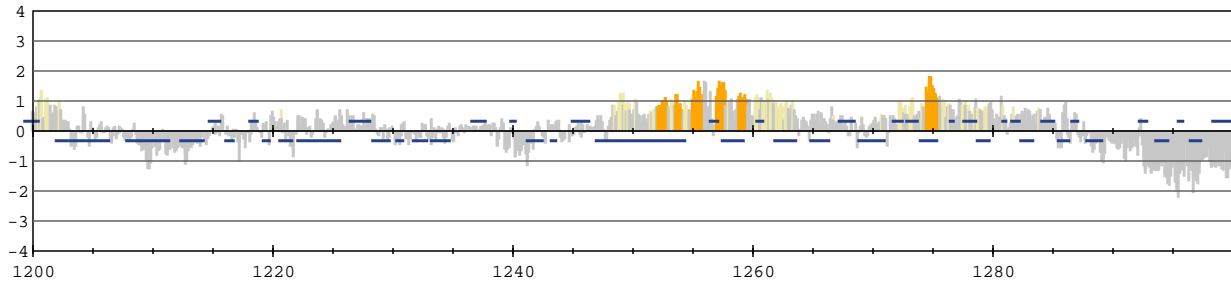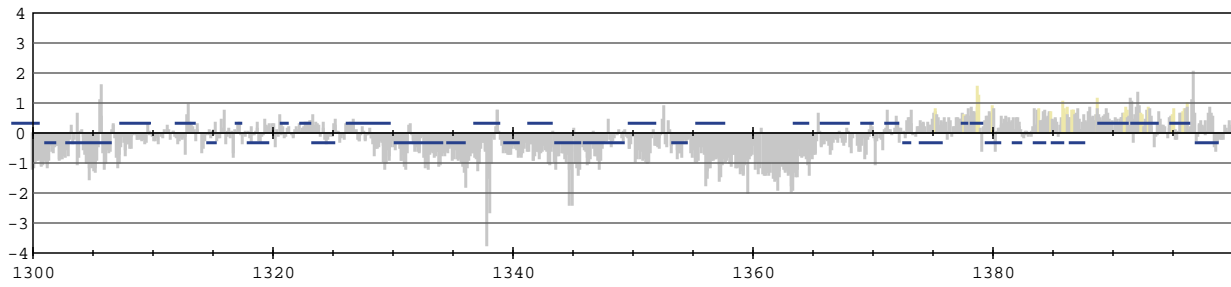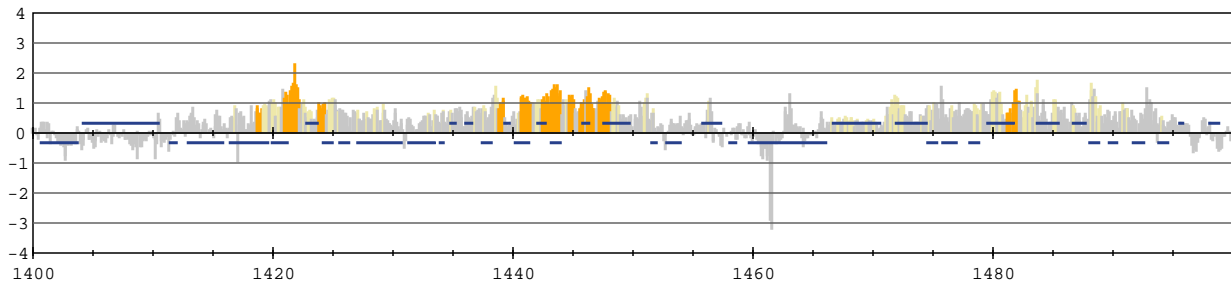

061102\_5\_WT\_HU150-061101\_3\_delcds1\_WCE\_0.001\_chr1

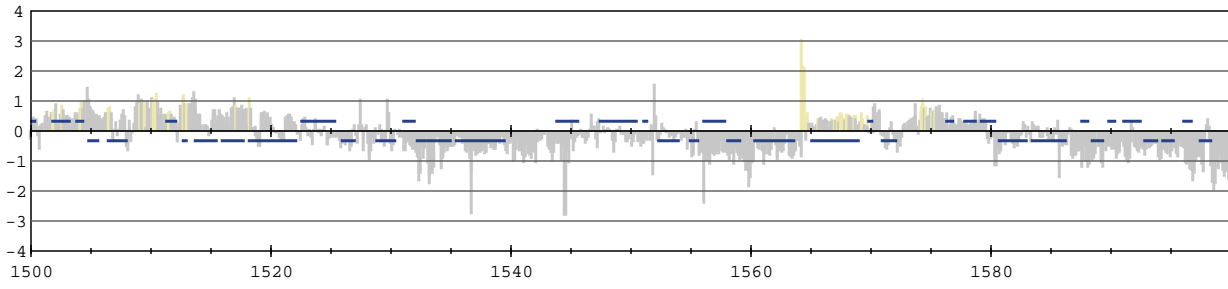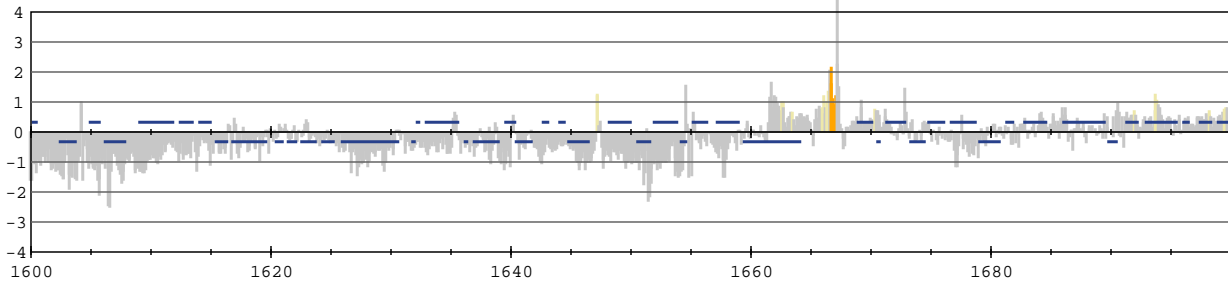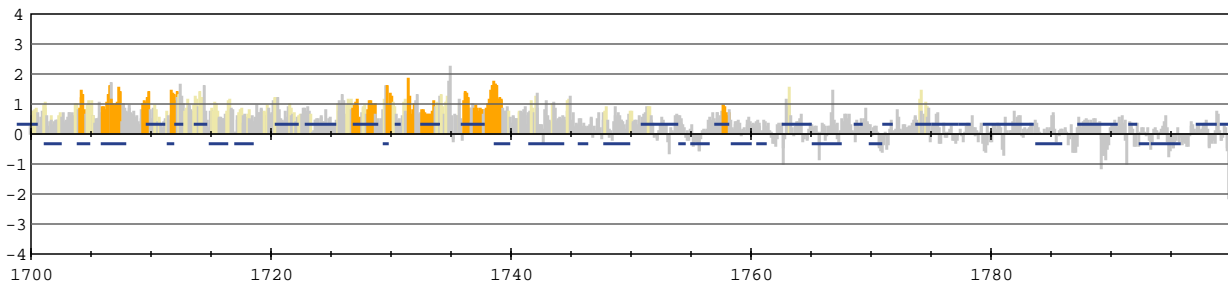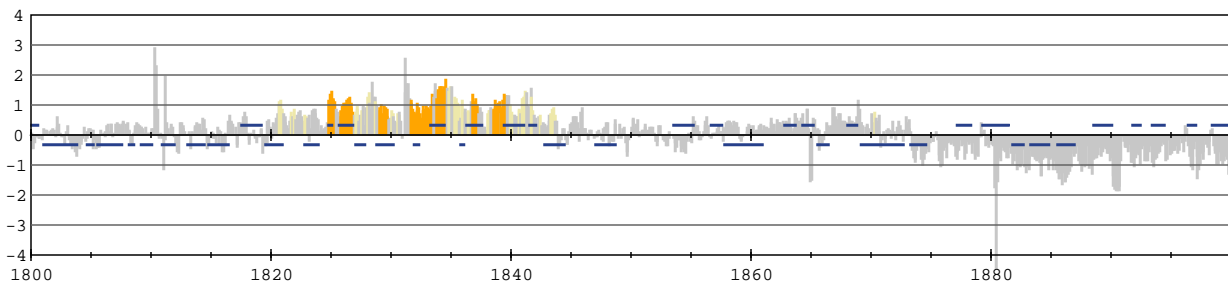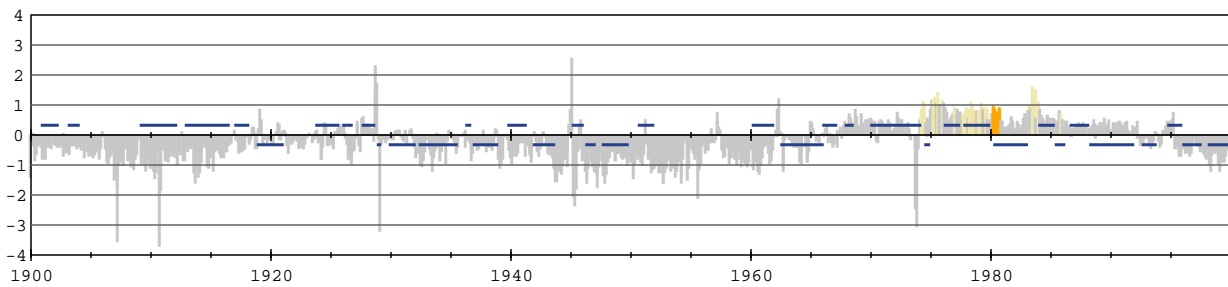

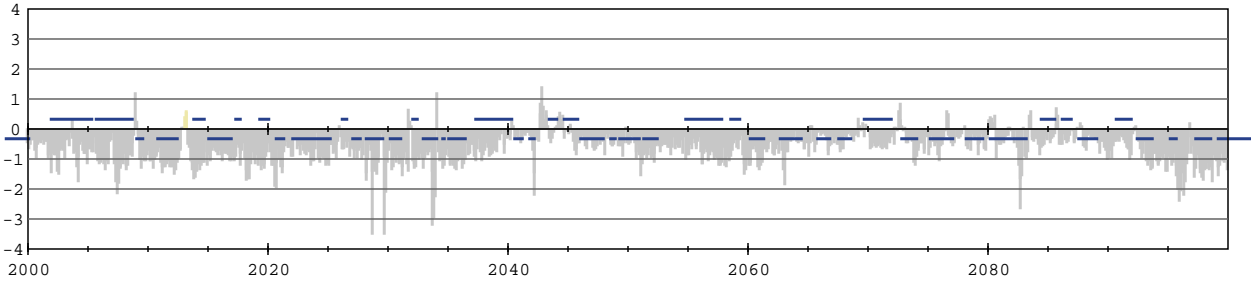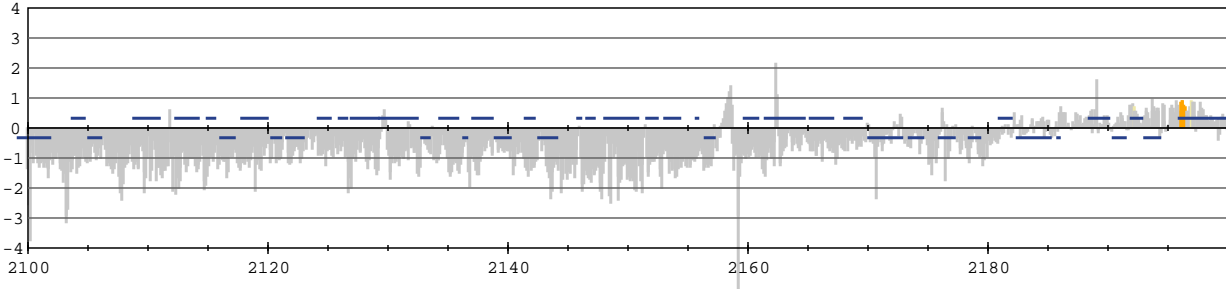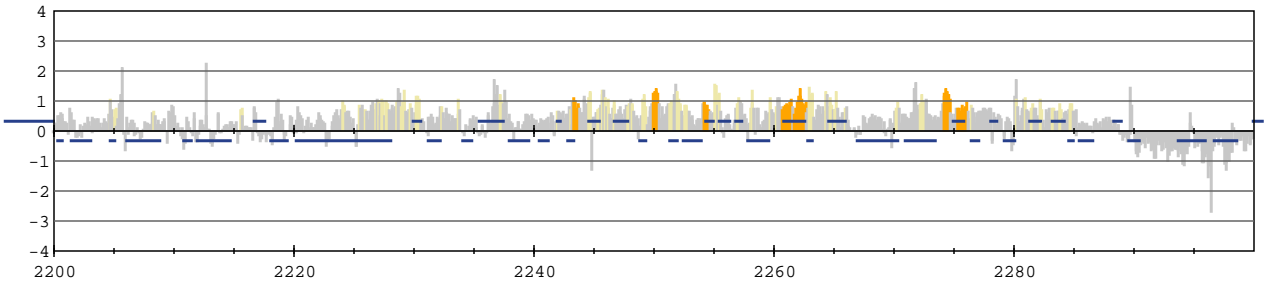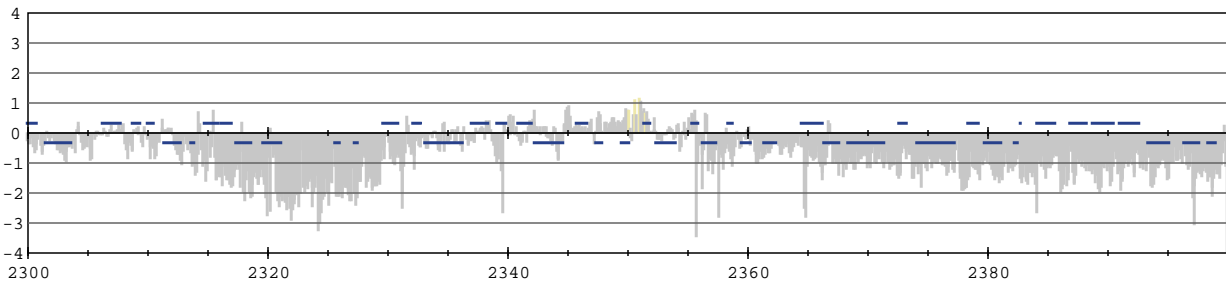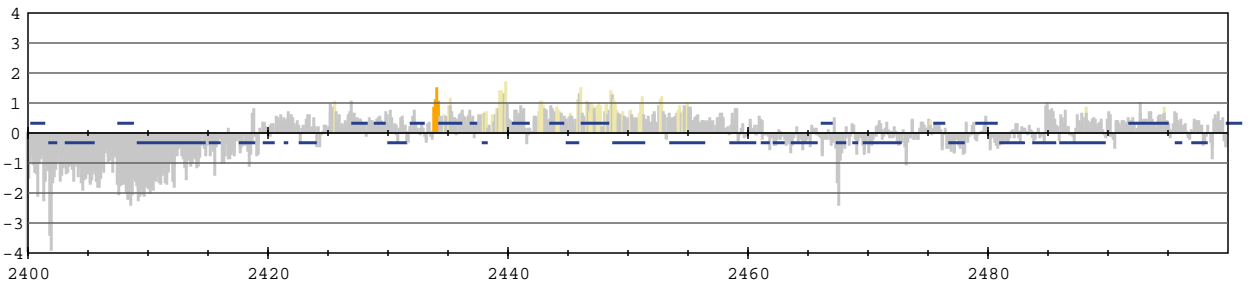

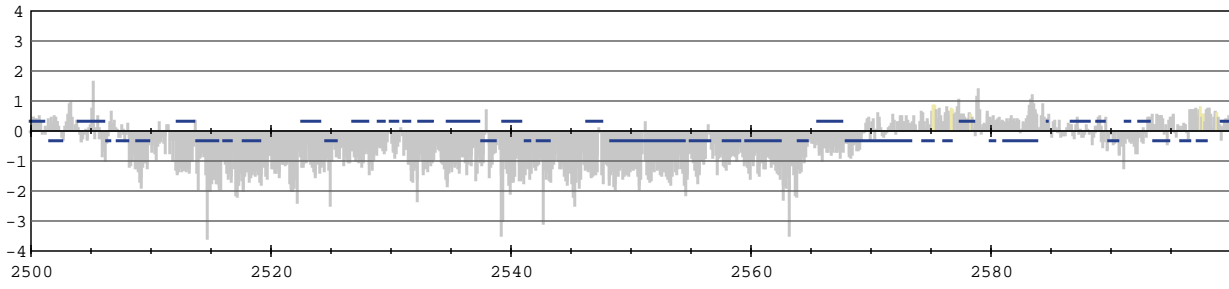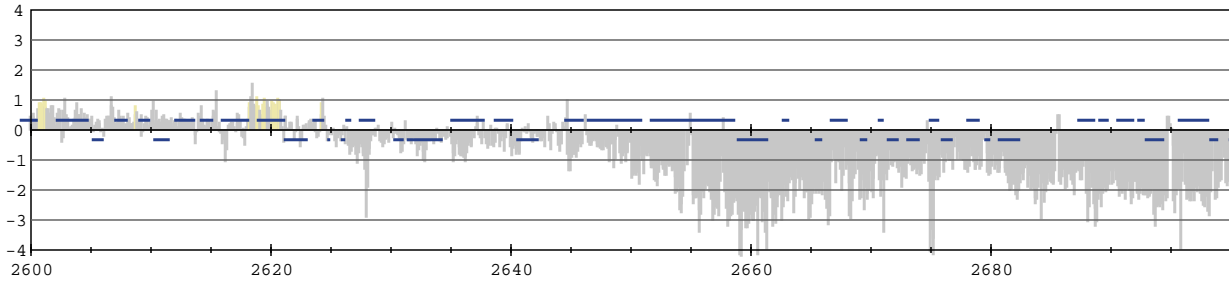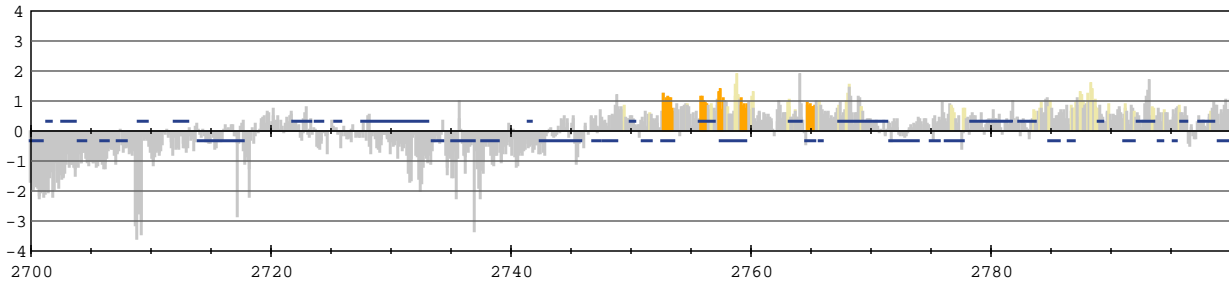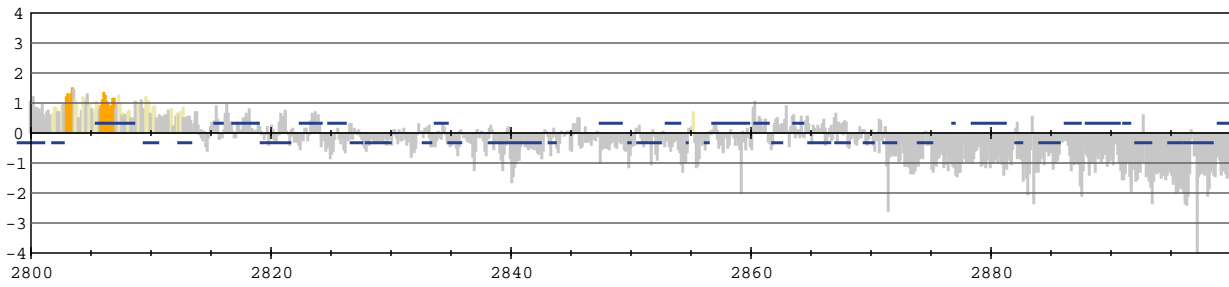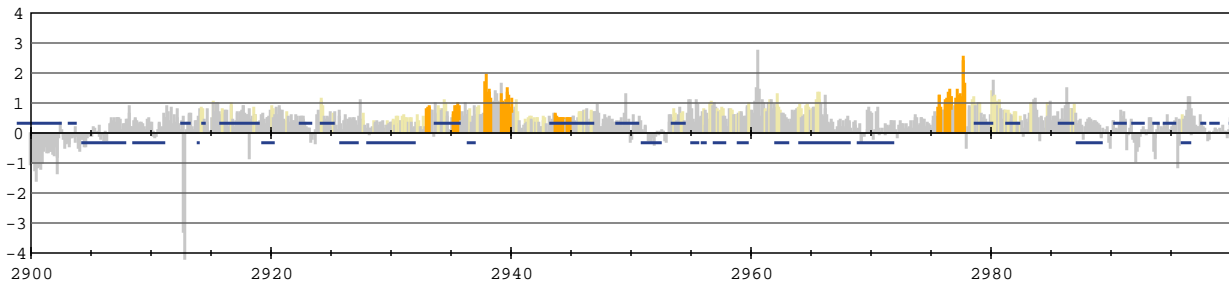

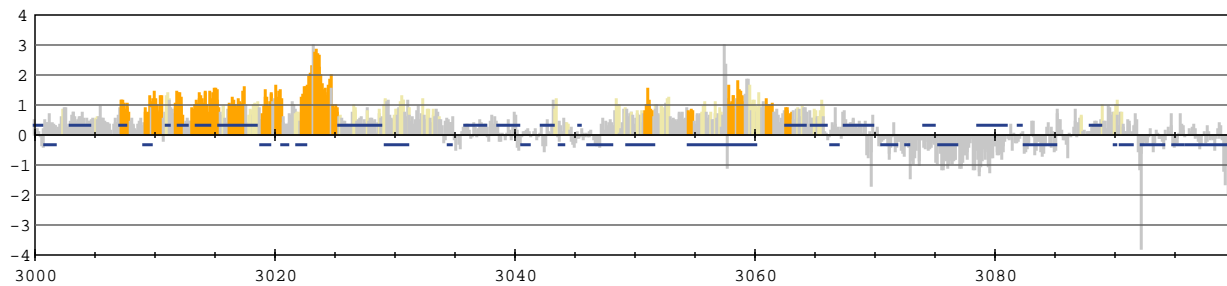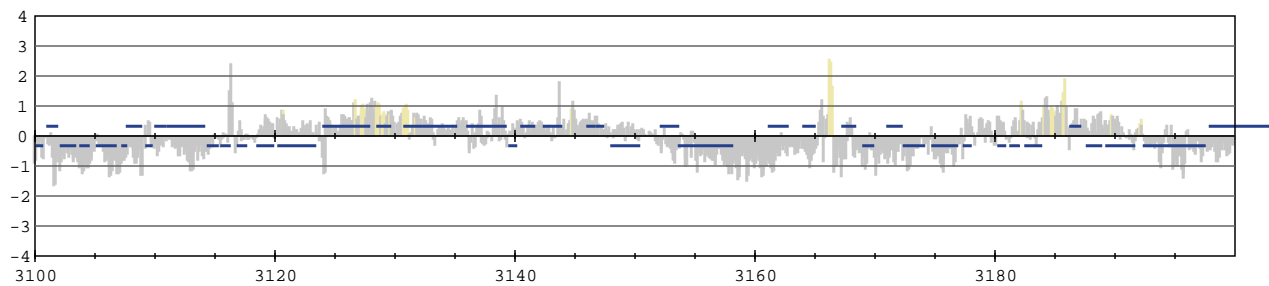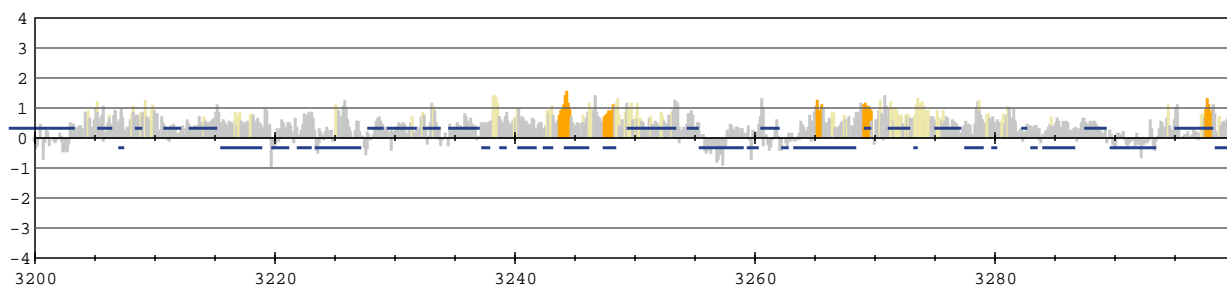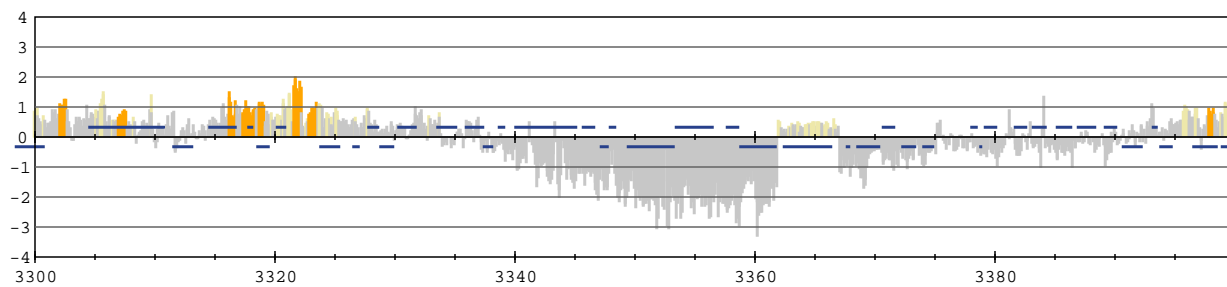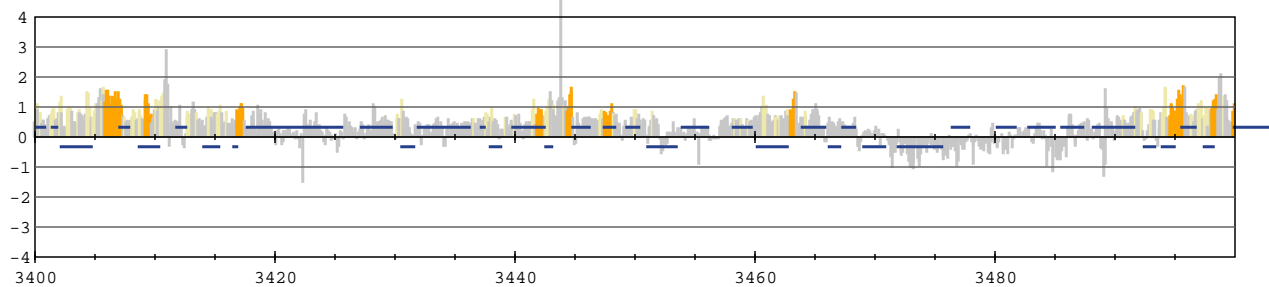

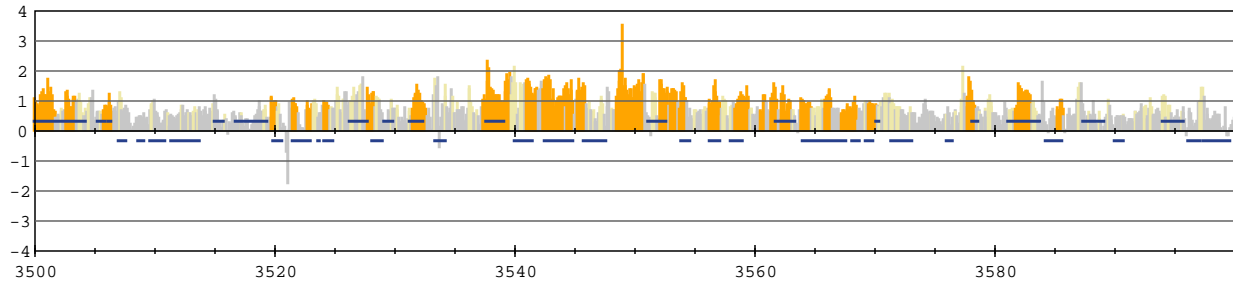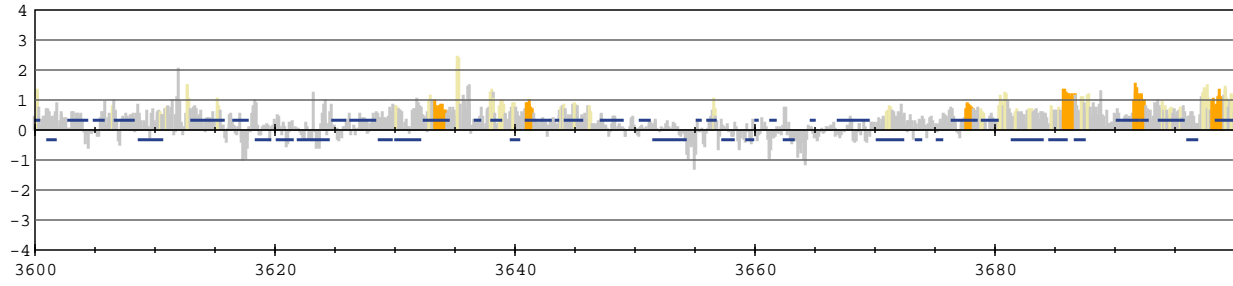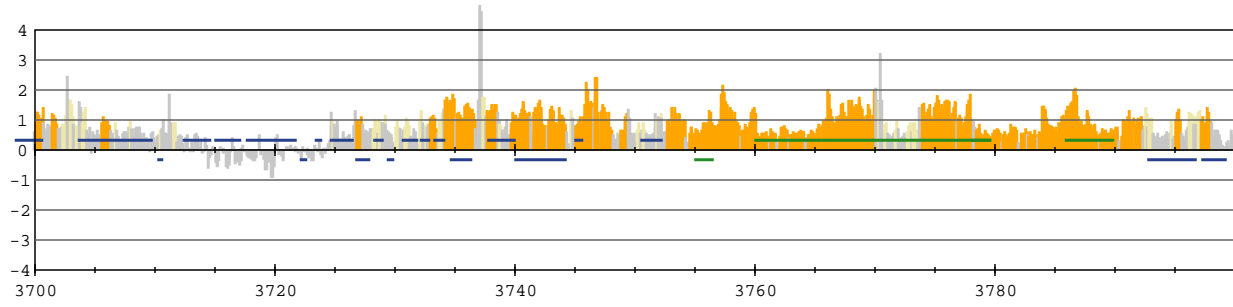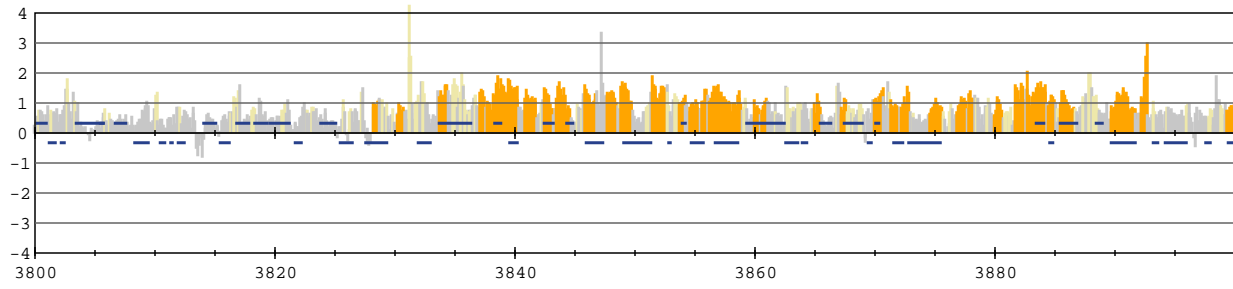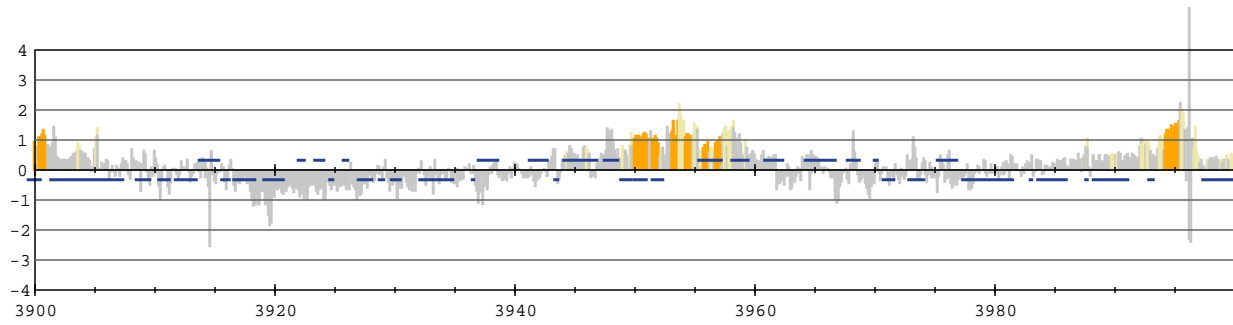



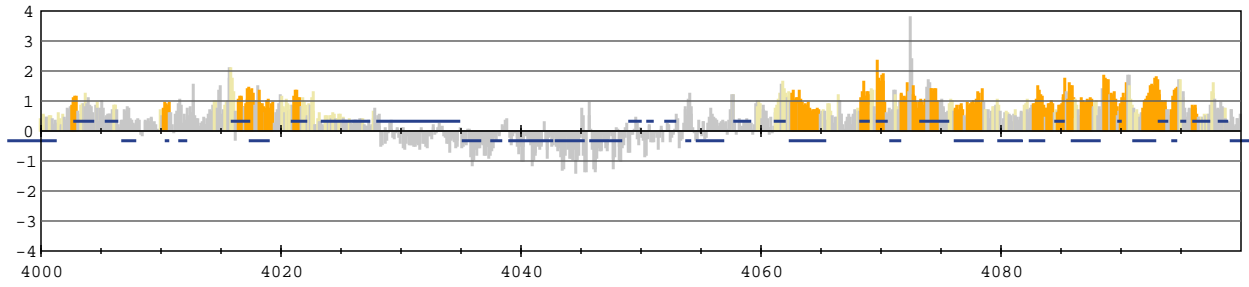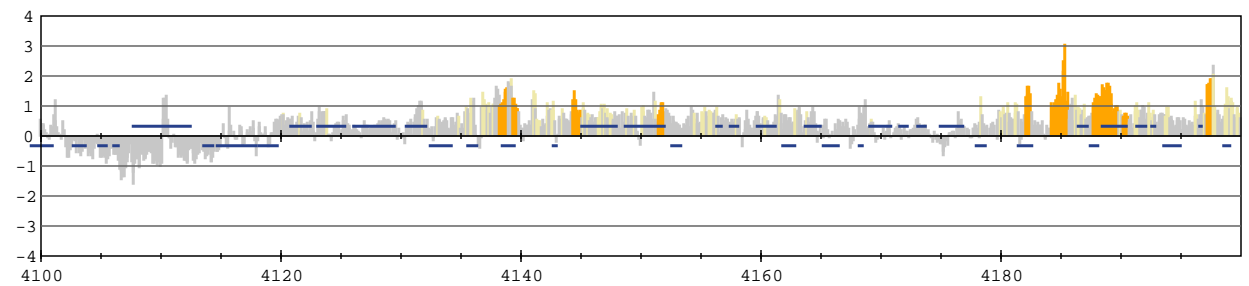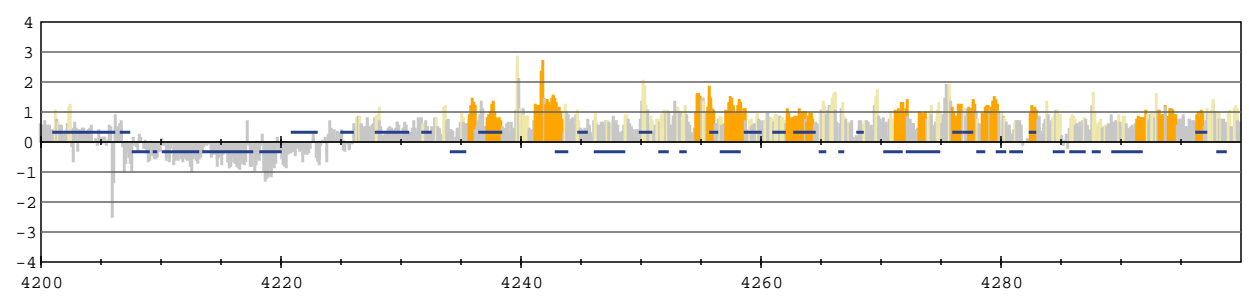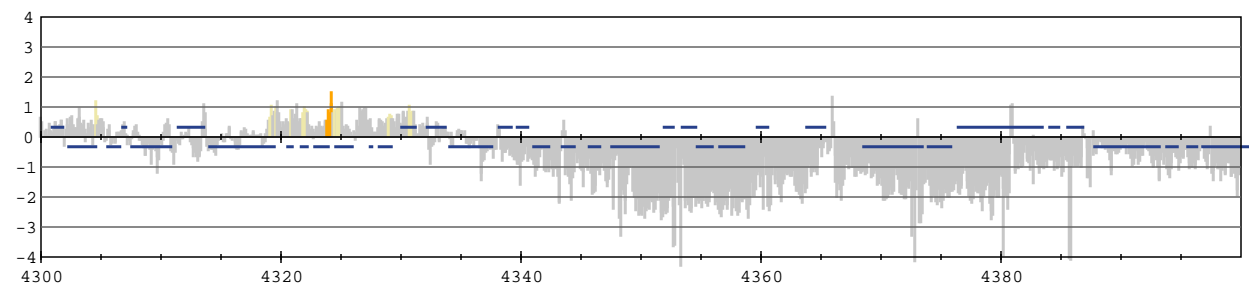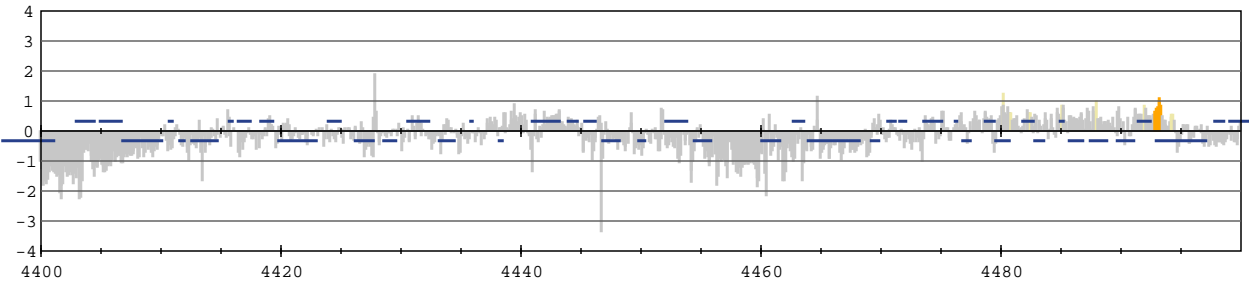

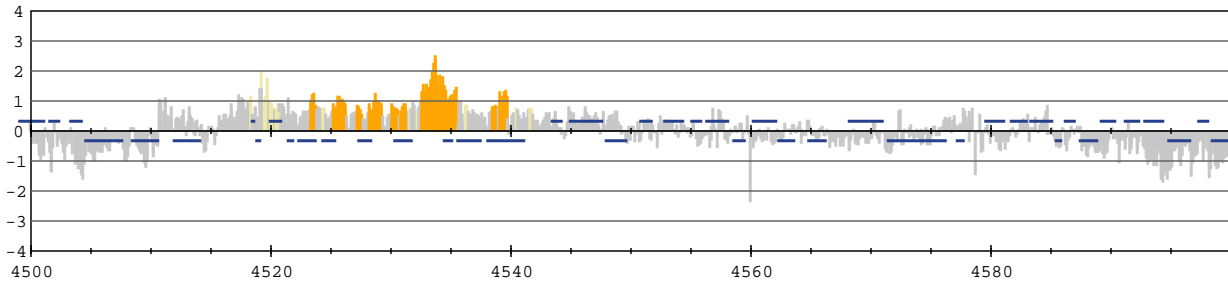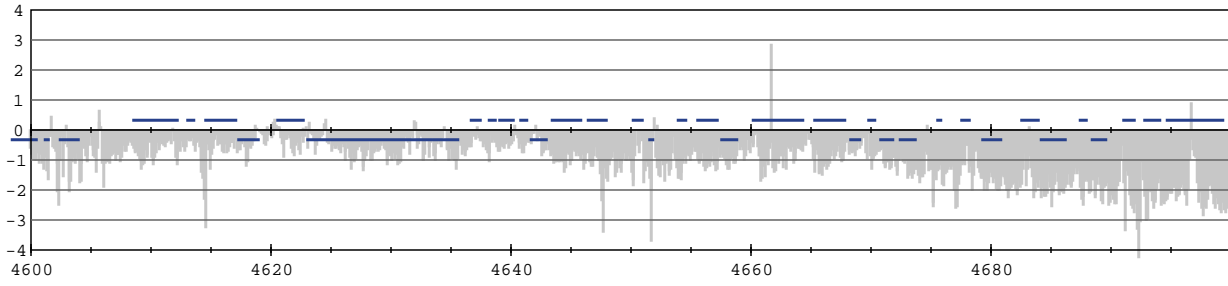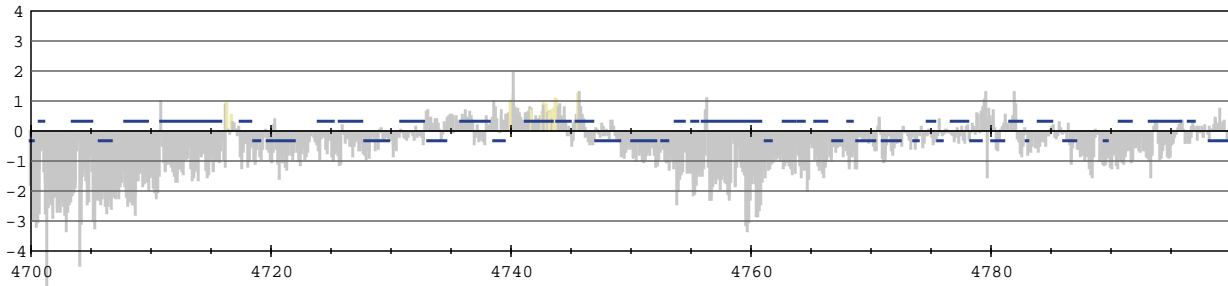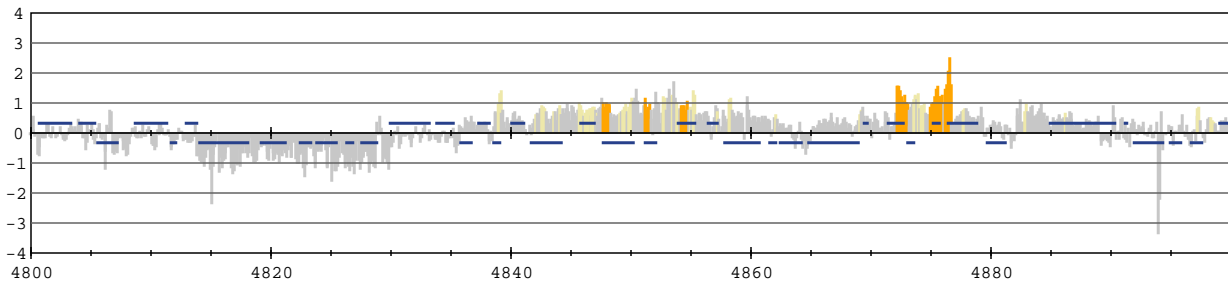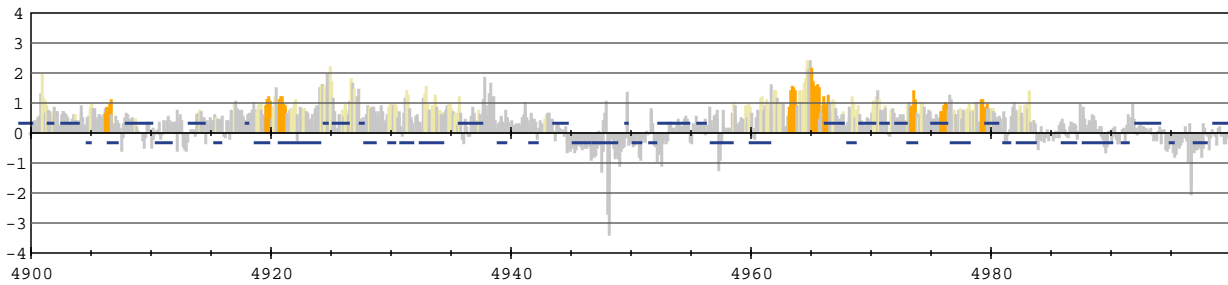

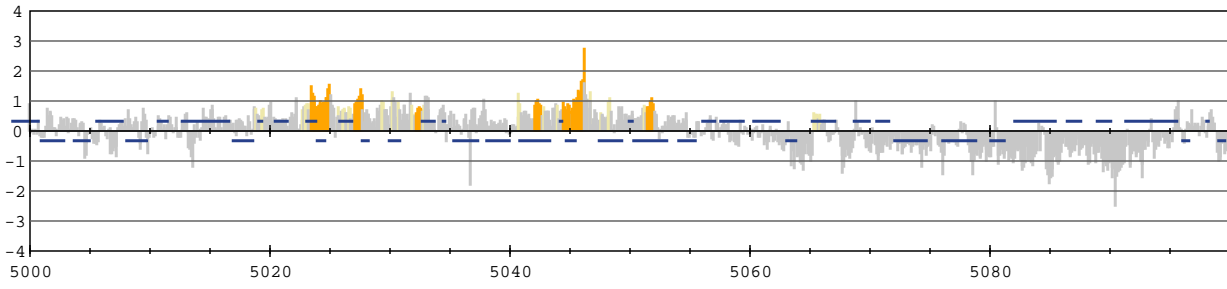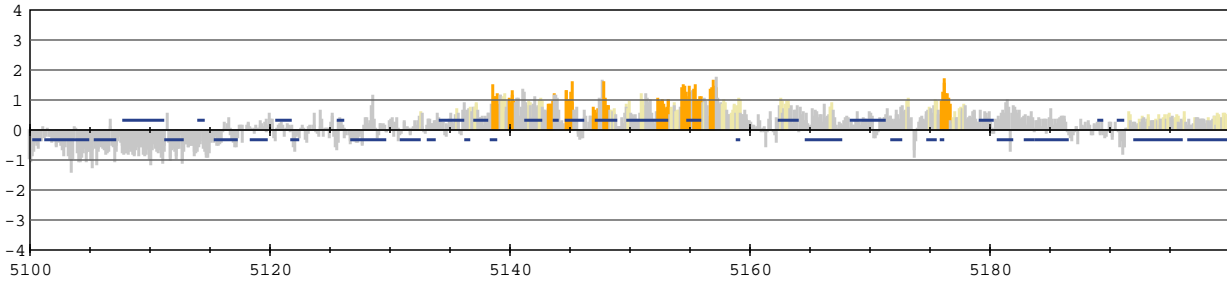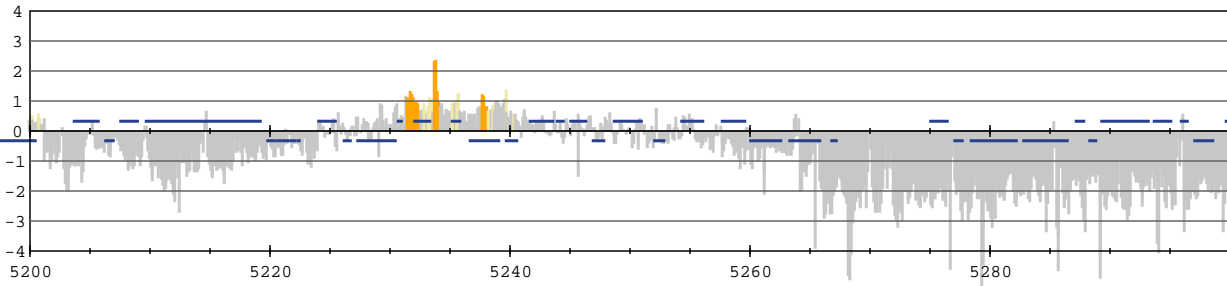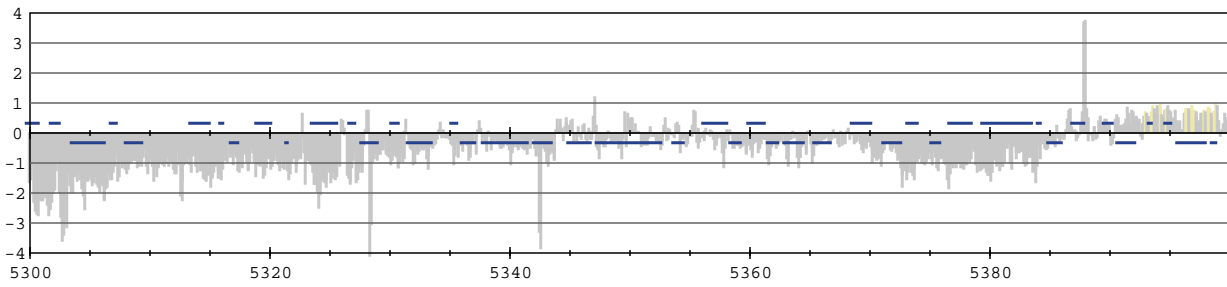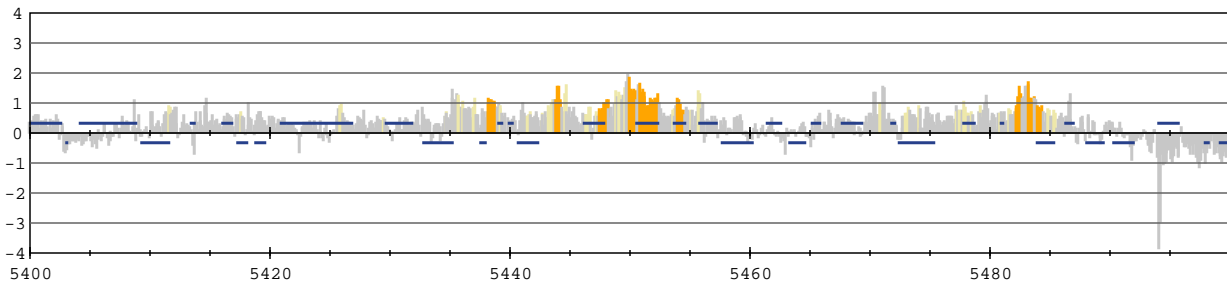

061102\_5\_WT\_HU150-061101\_3\_delcds1\_WCE\_0.001\_chr1

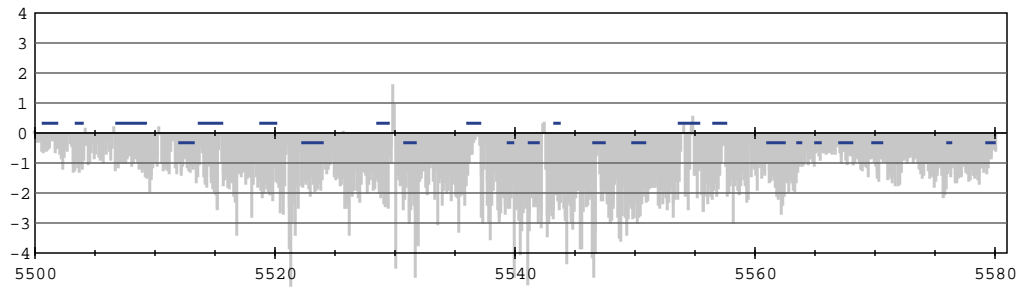

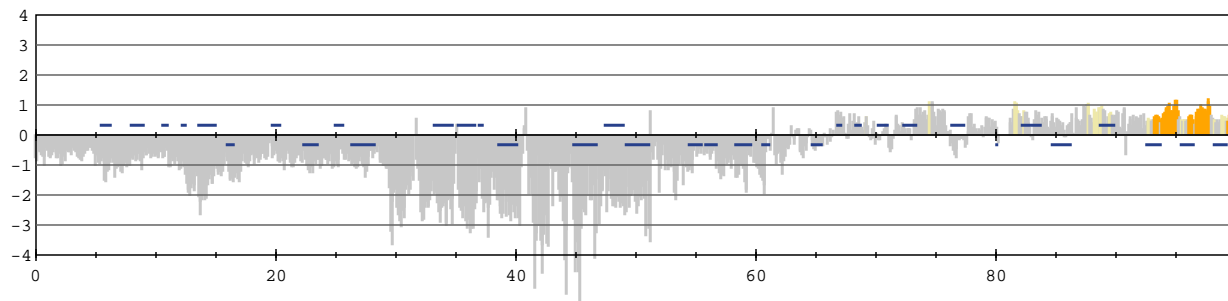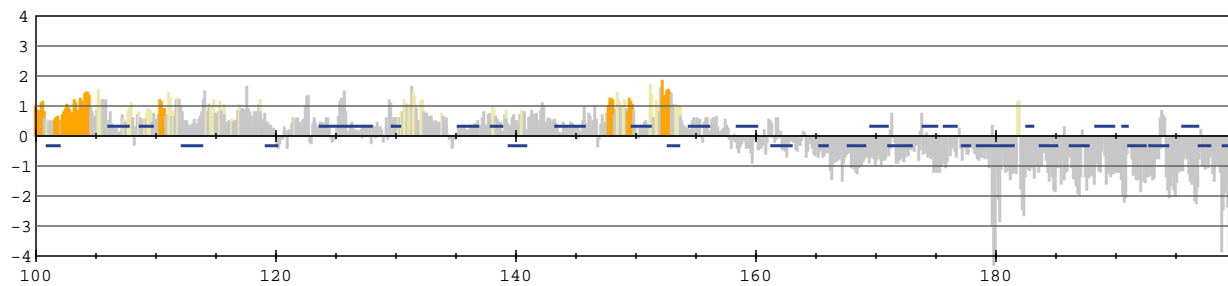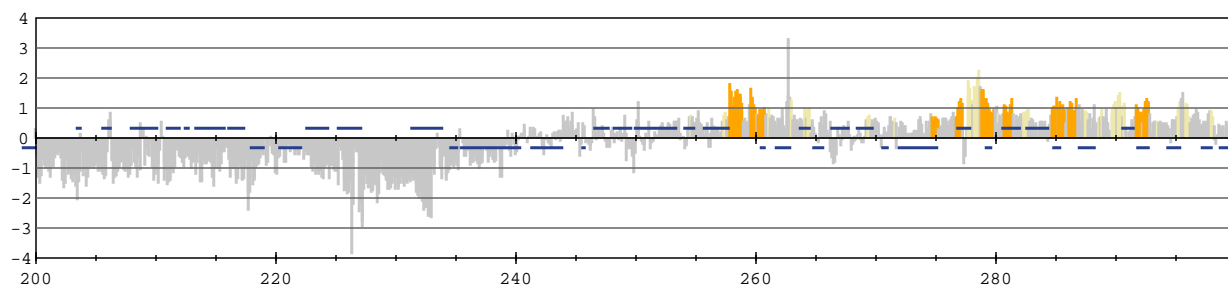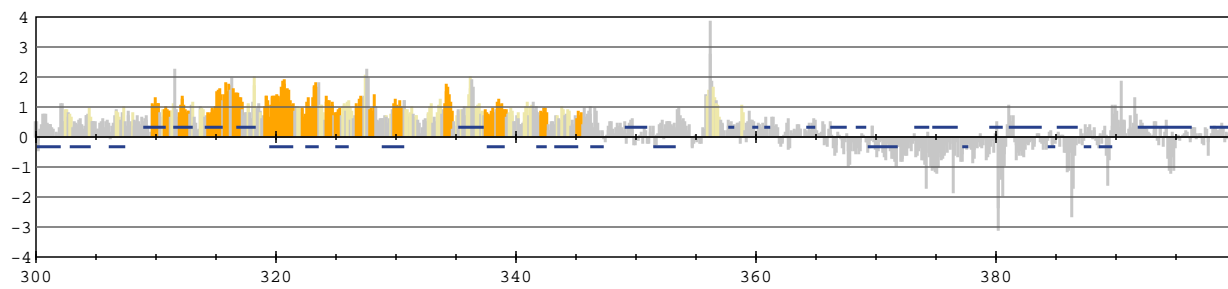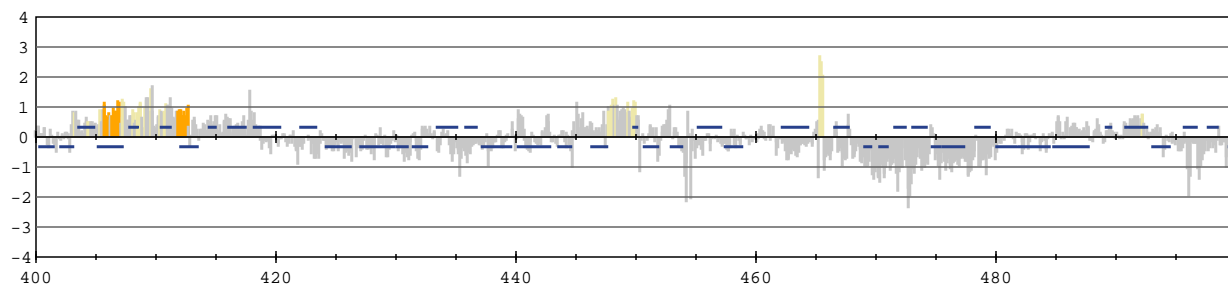

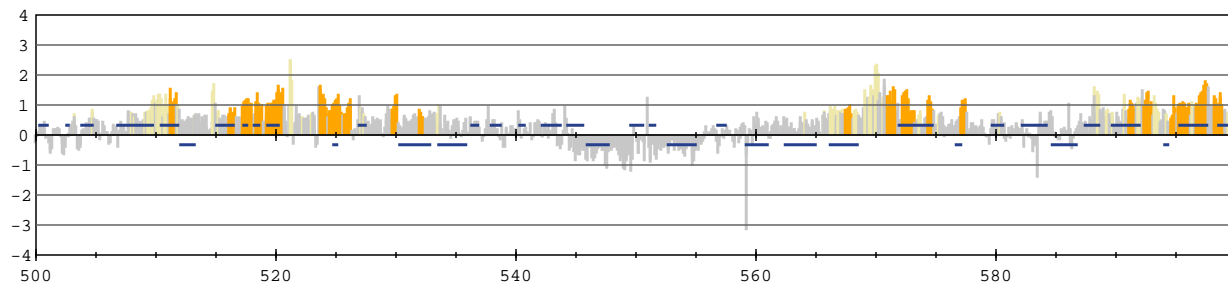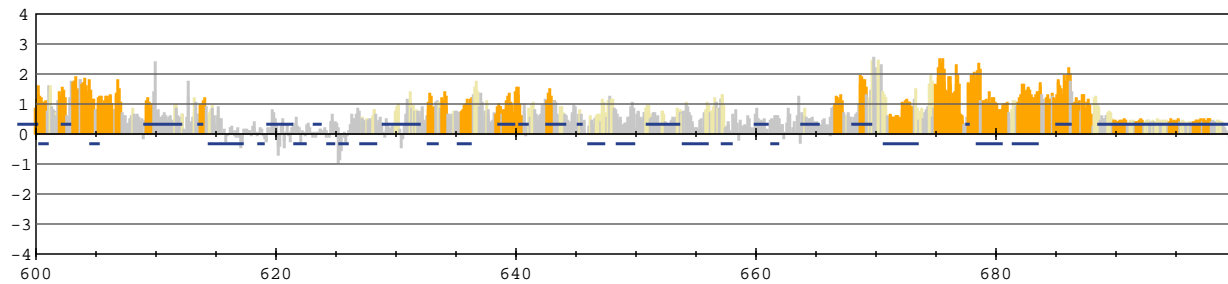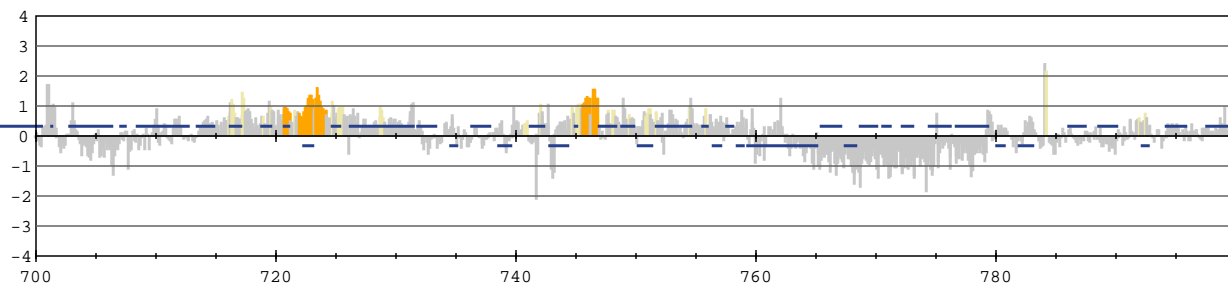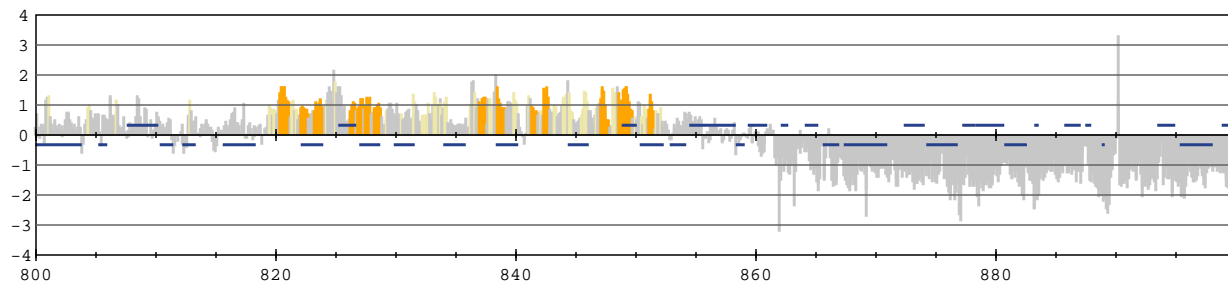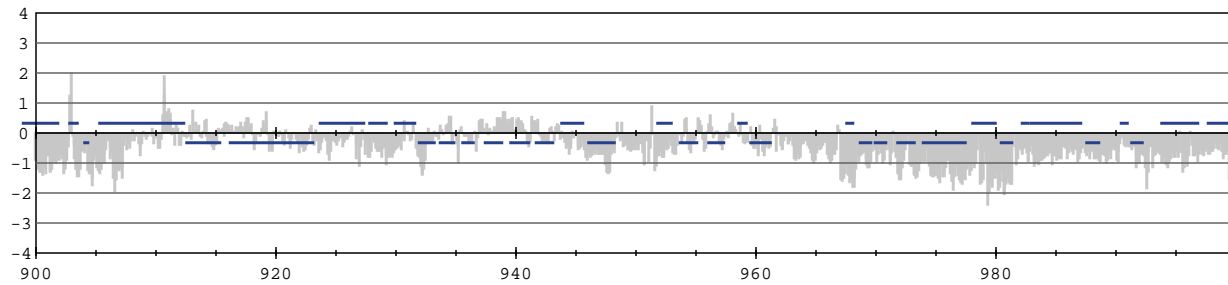

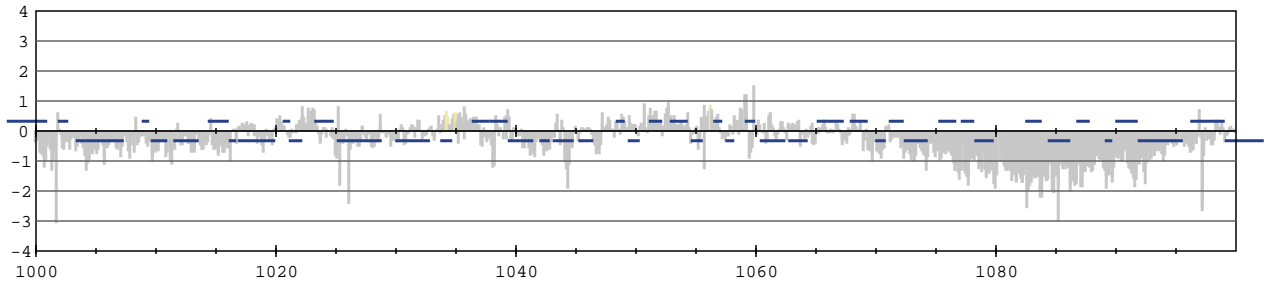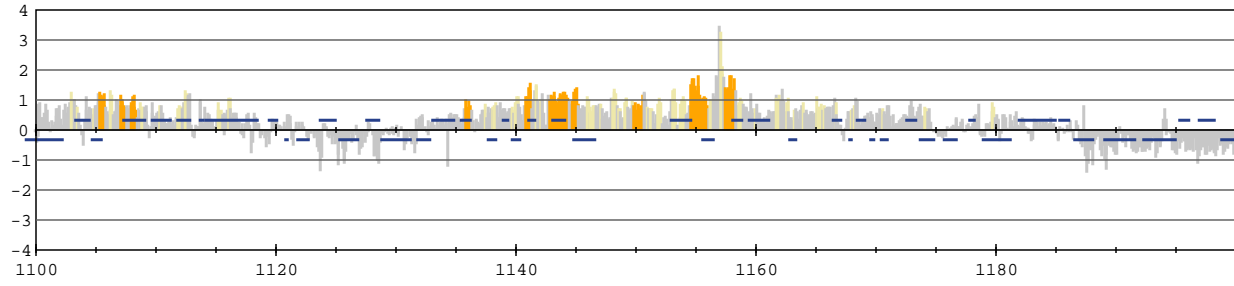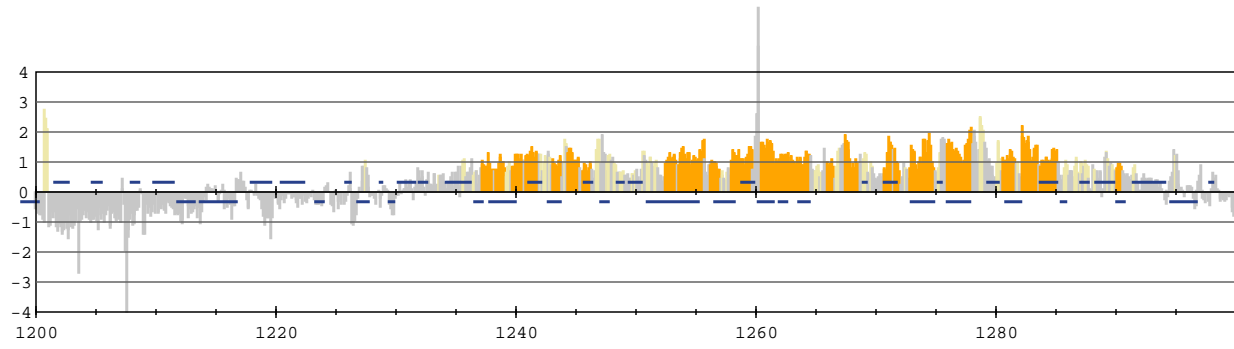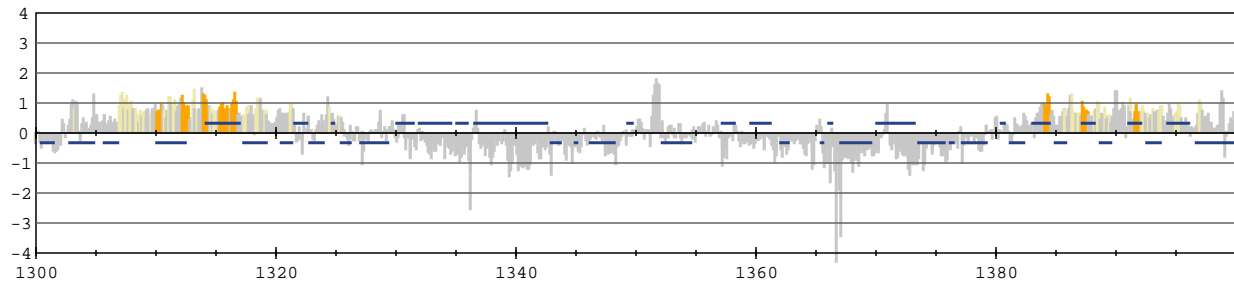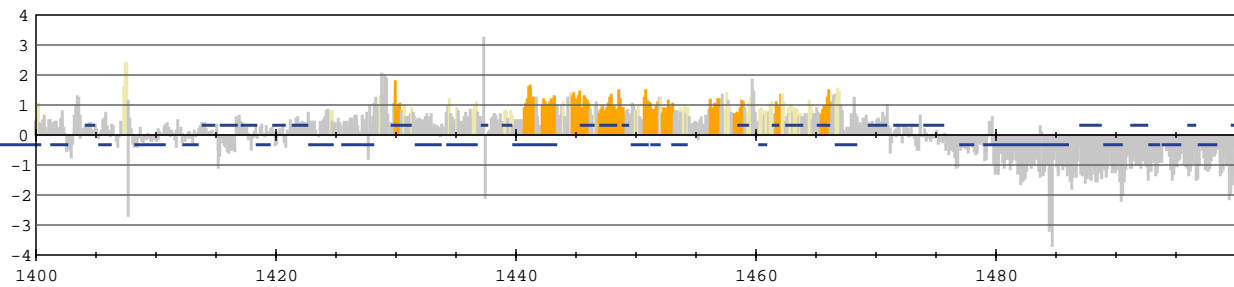

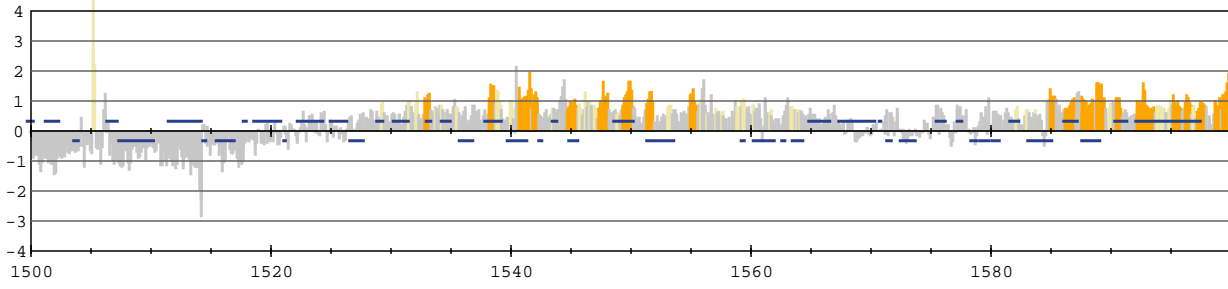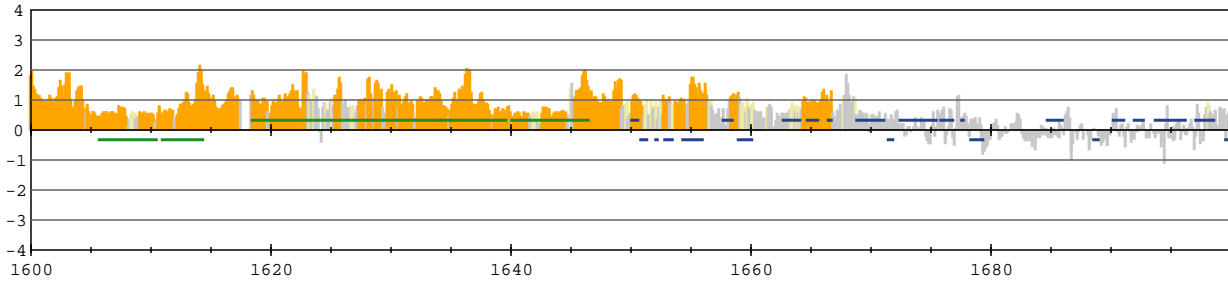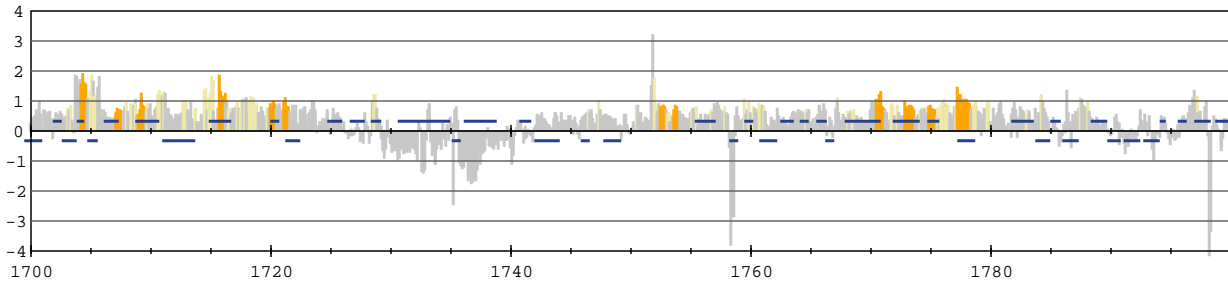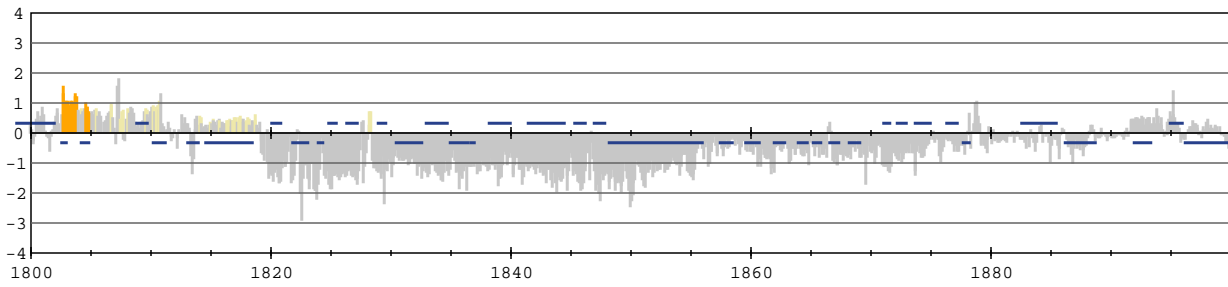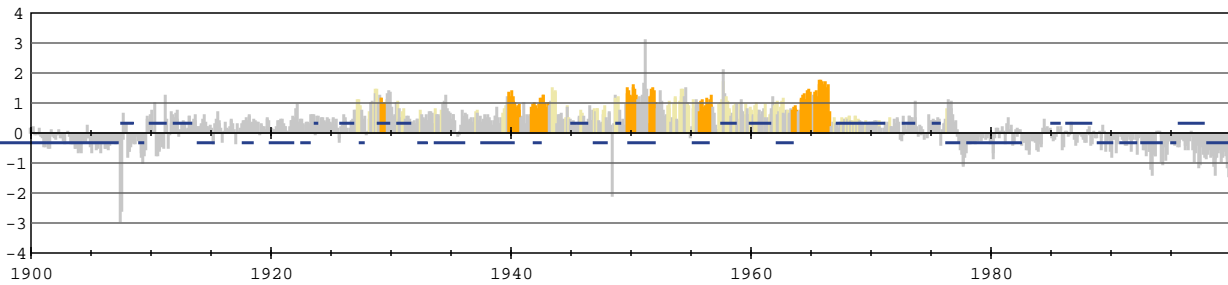



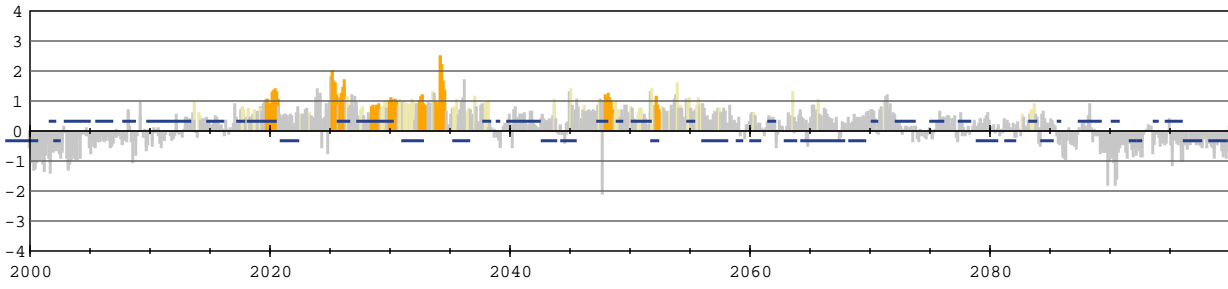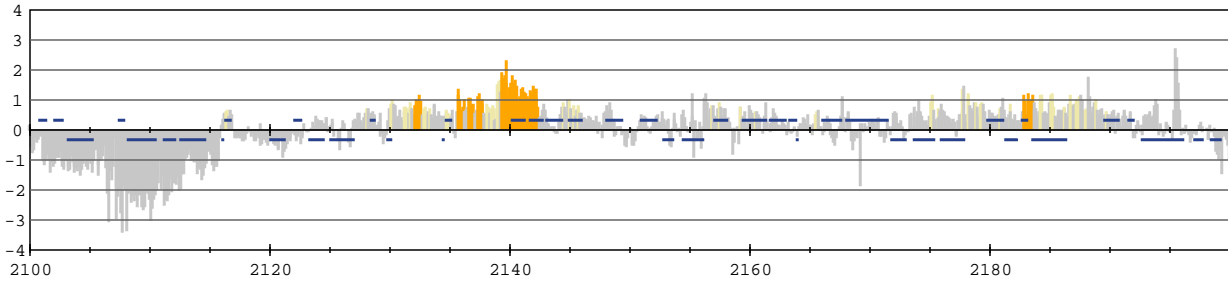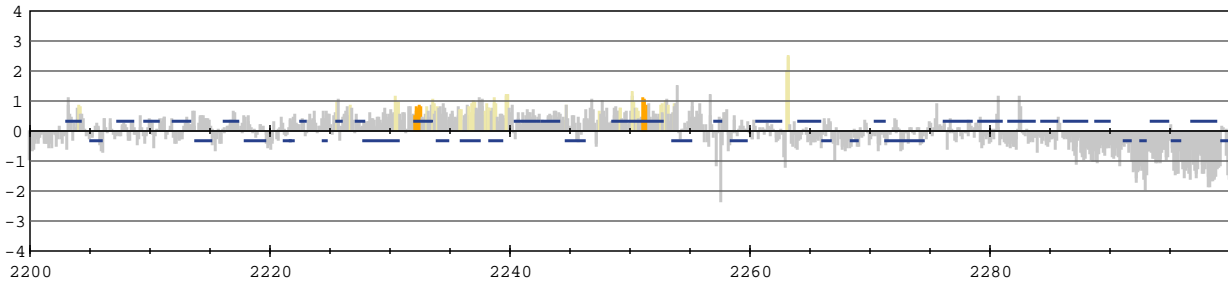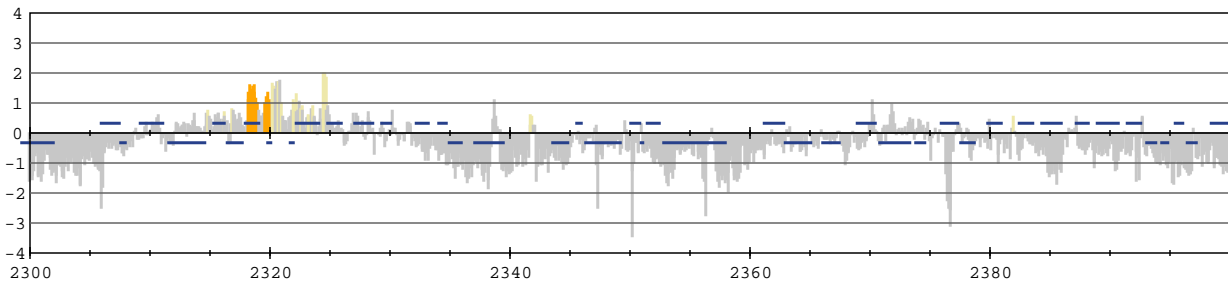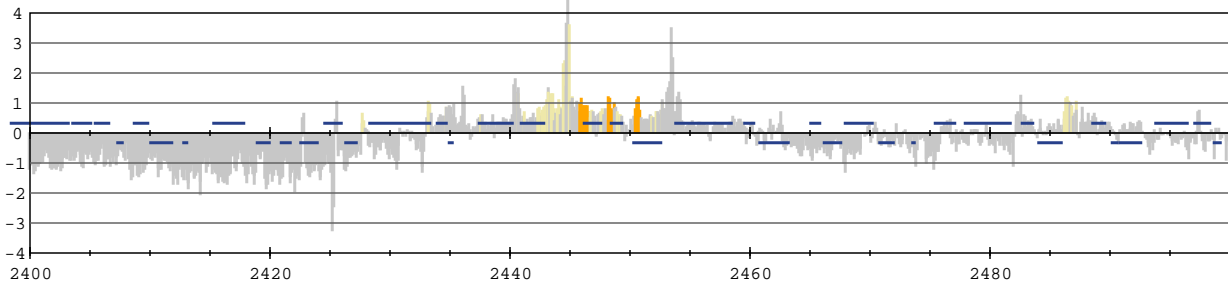

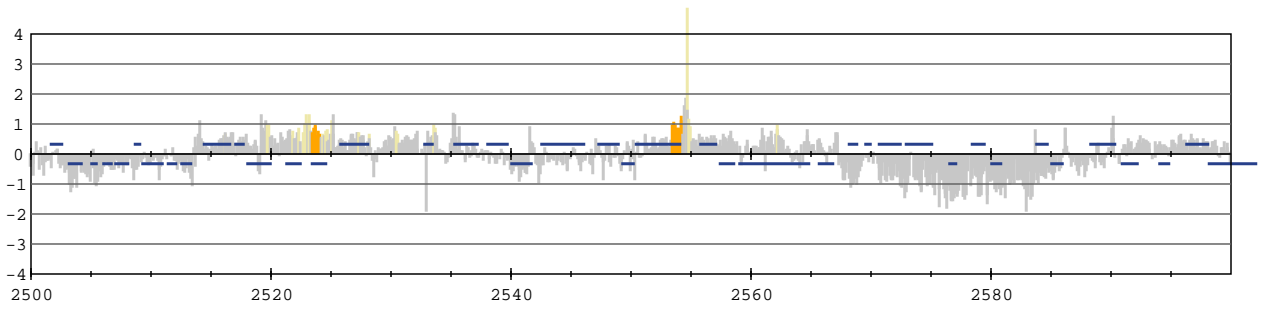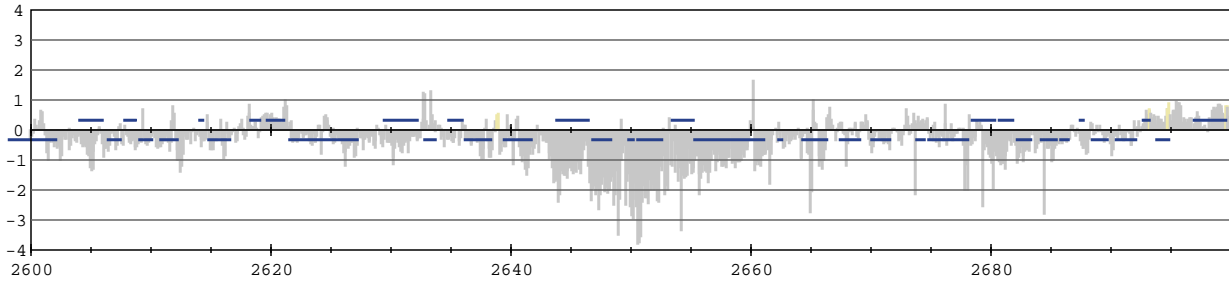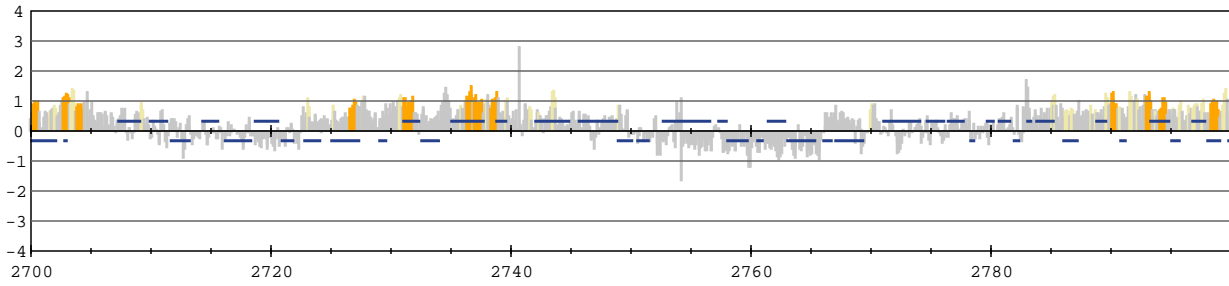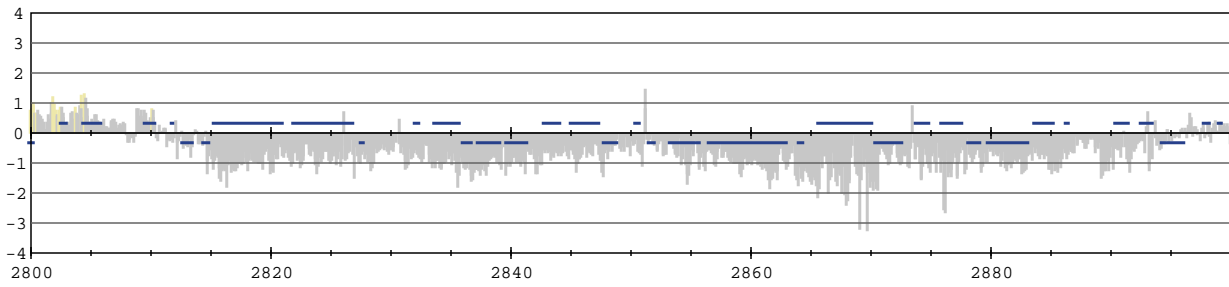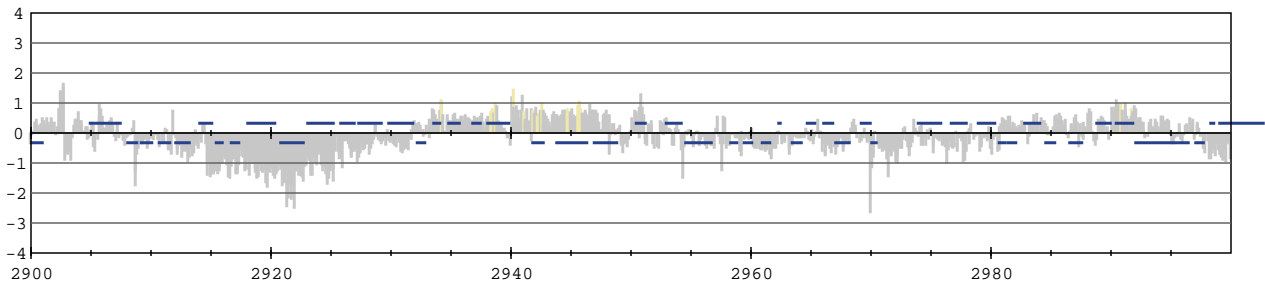

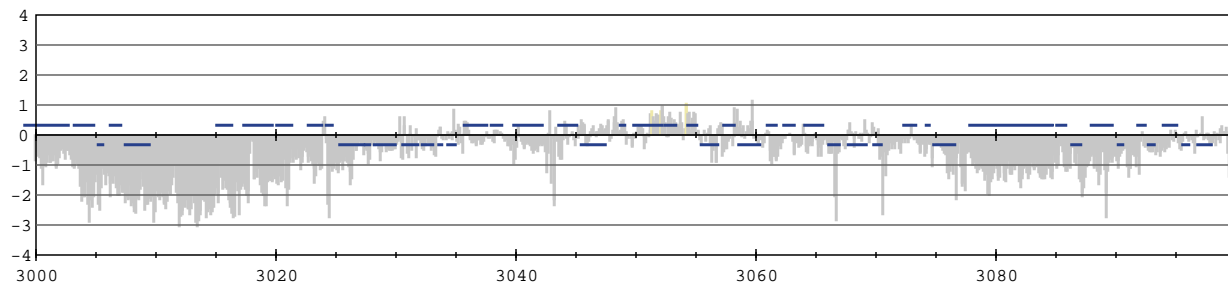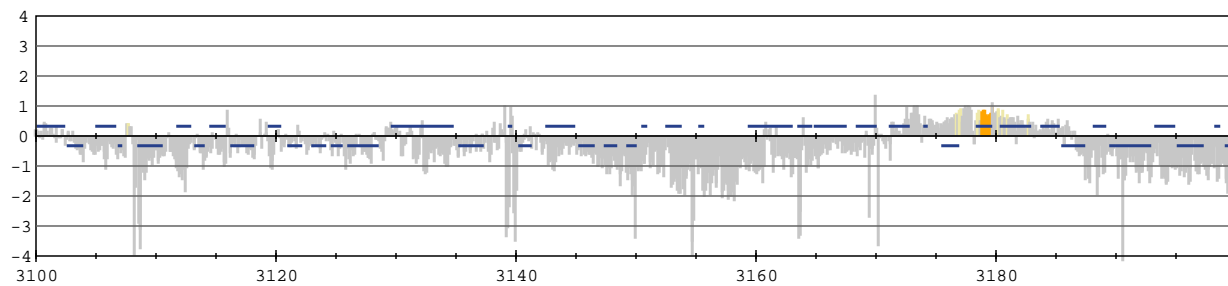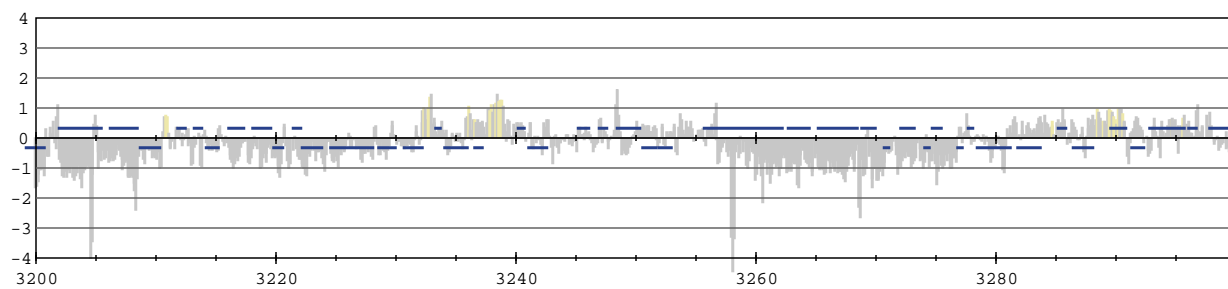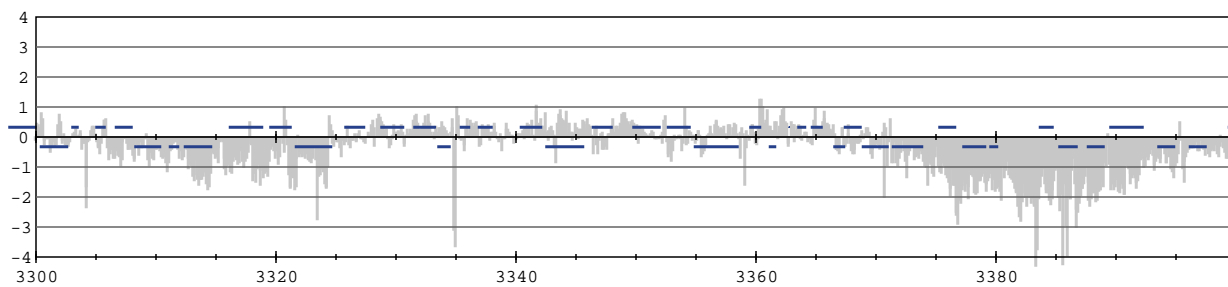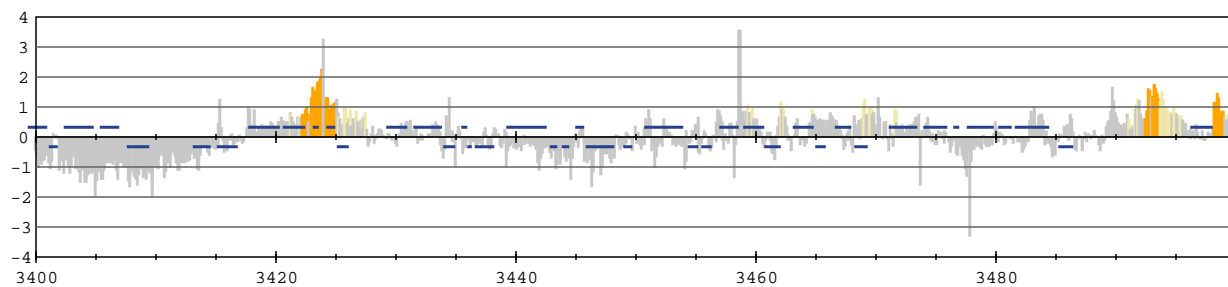

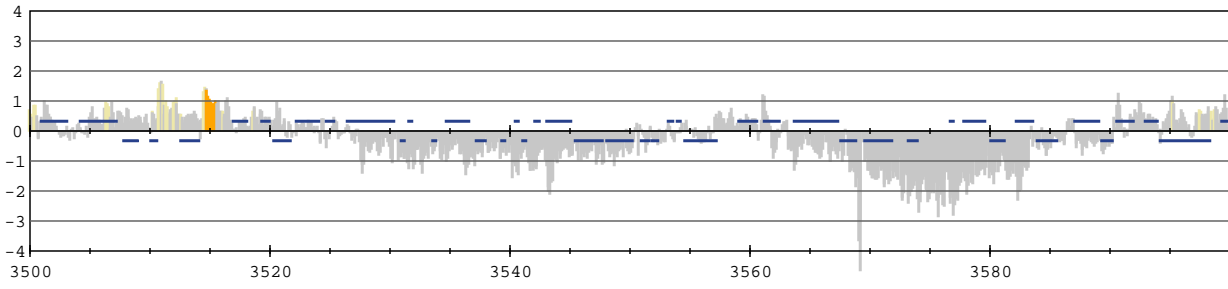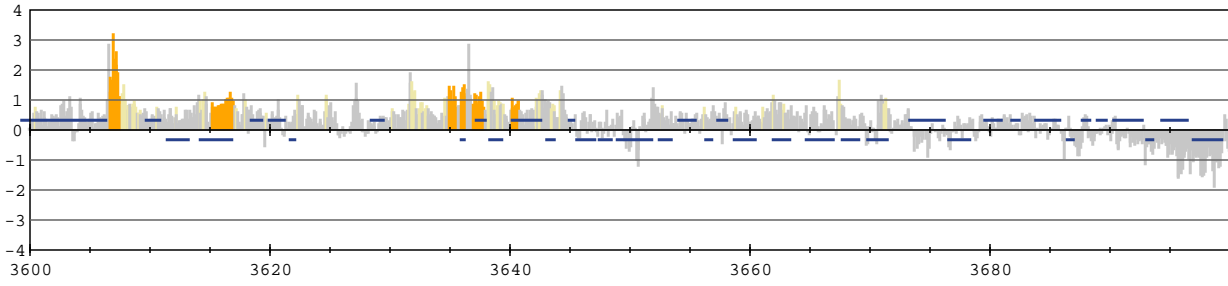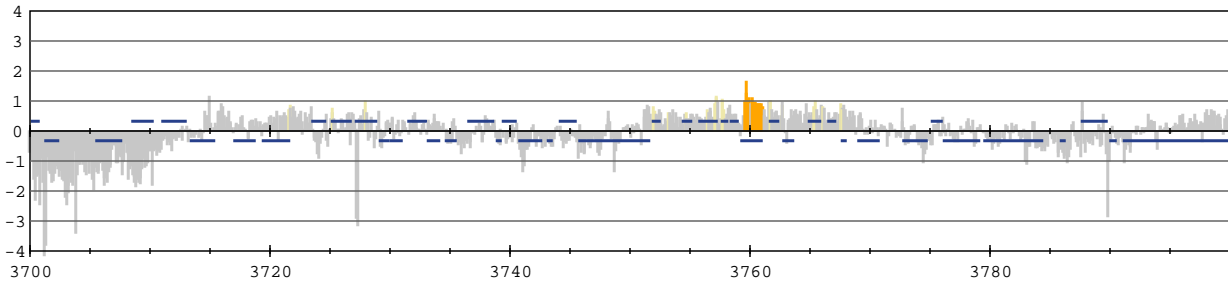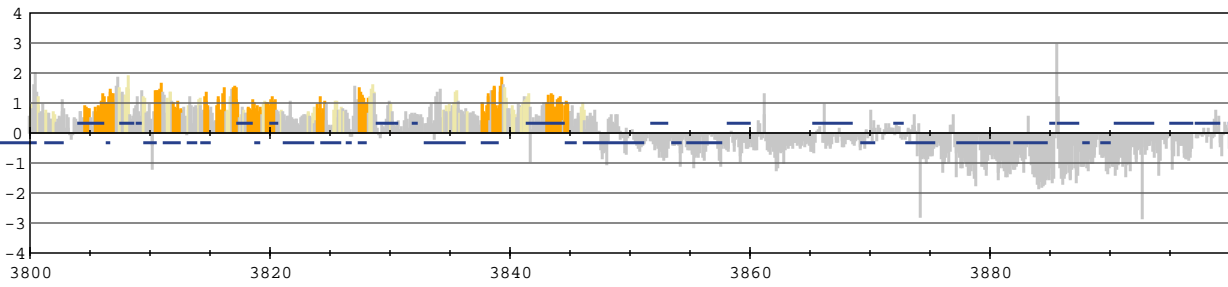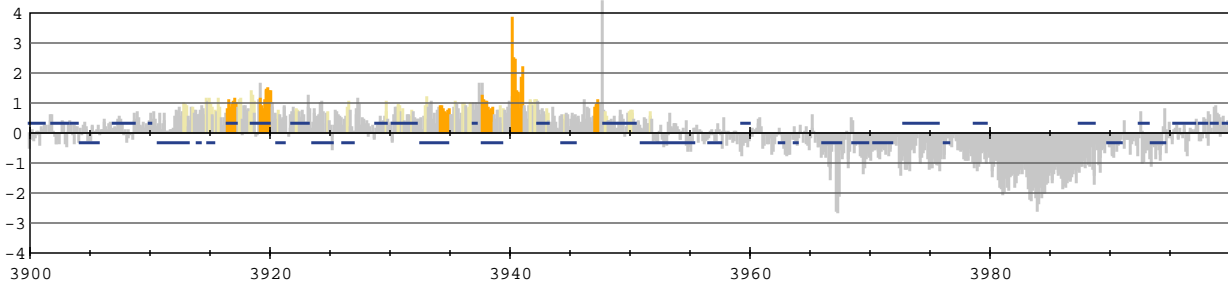

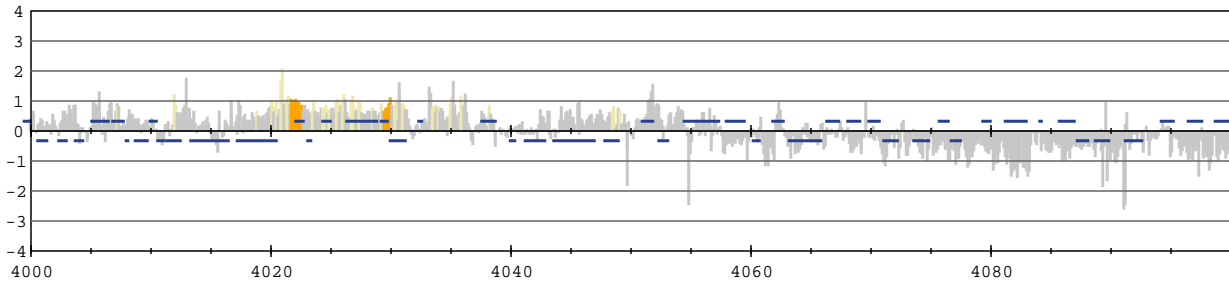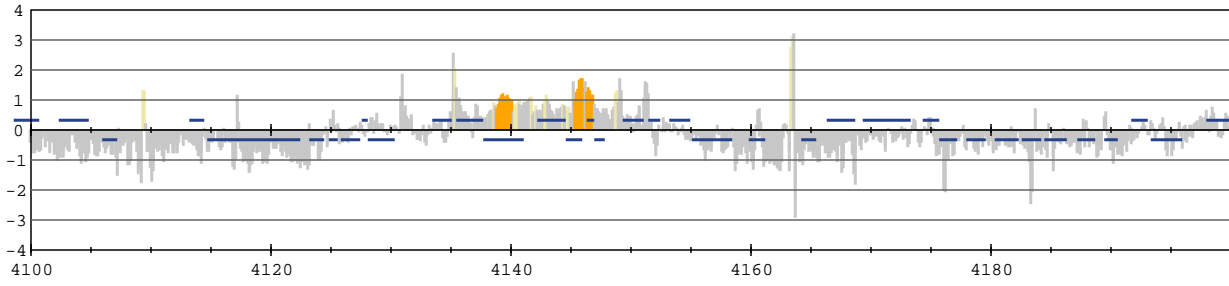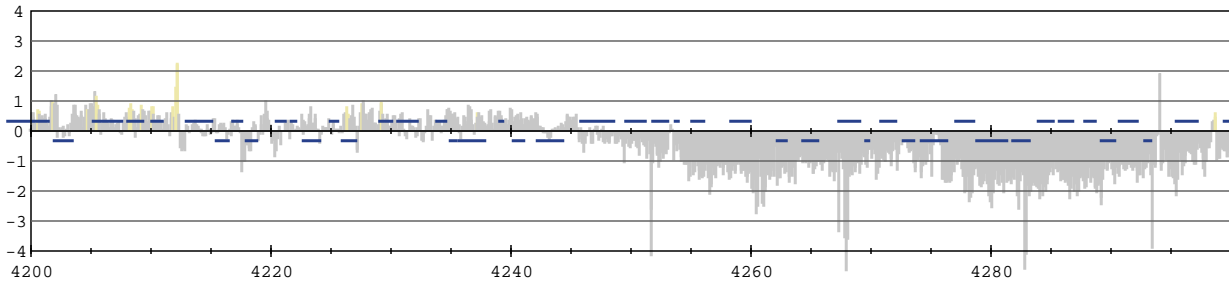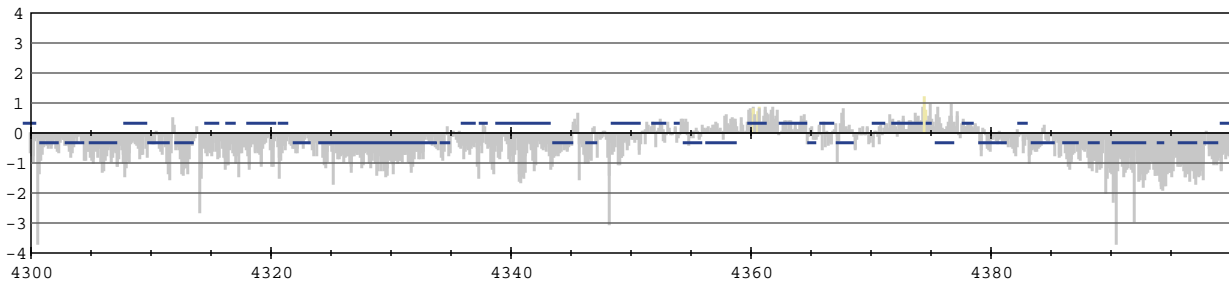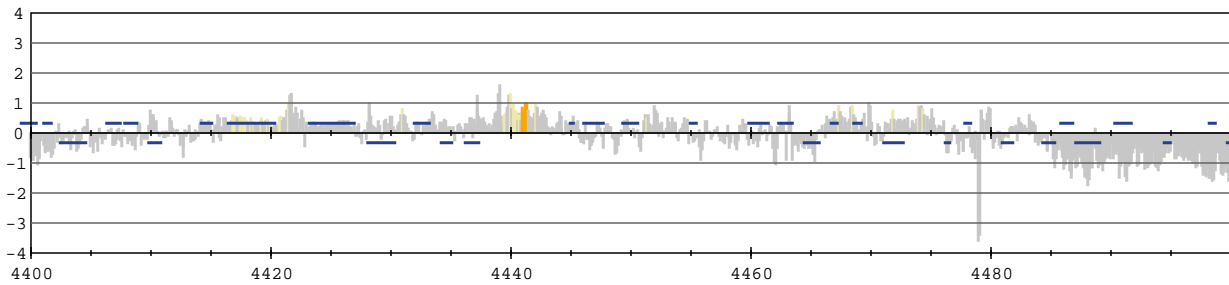

061102\_5\_WT\_HU150-061101\_3\_delcds1\_WCE\_0.001\_chr2

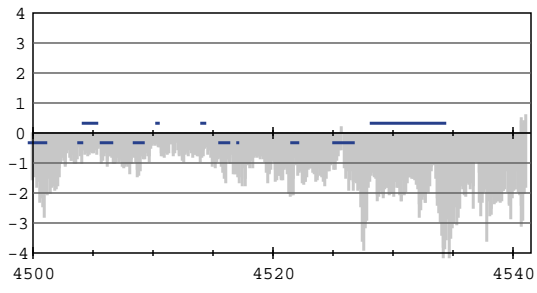

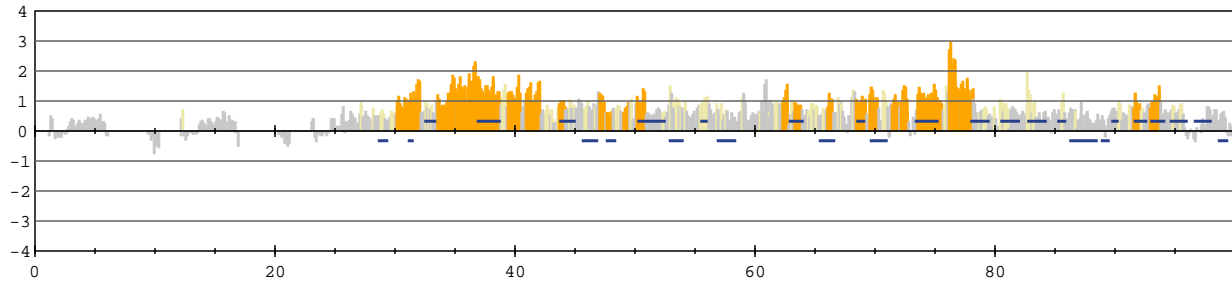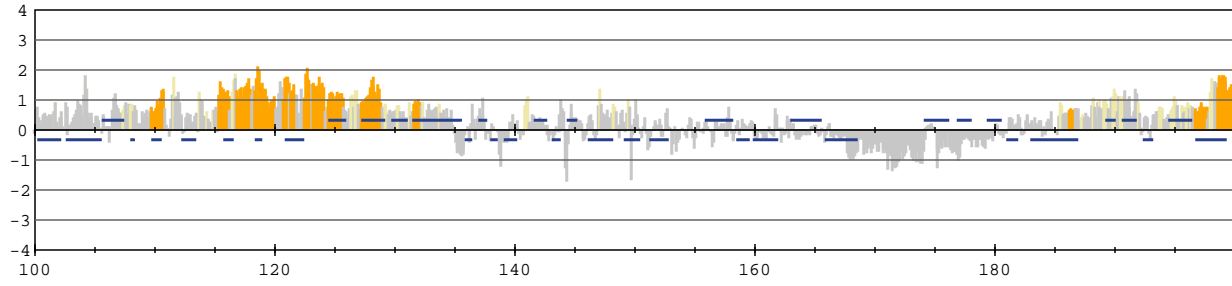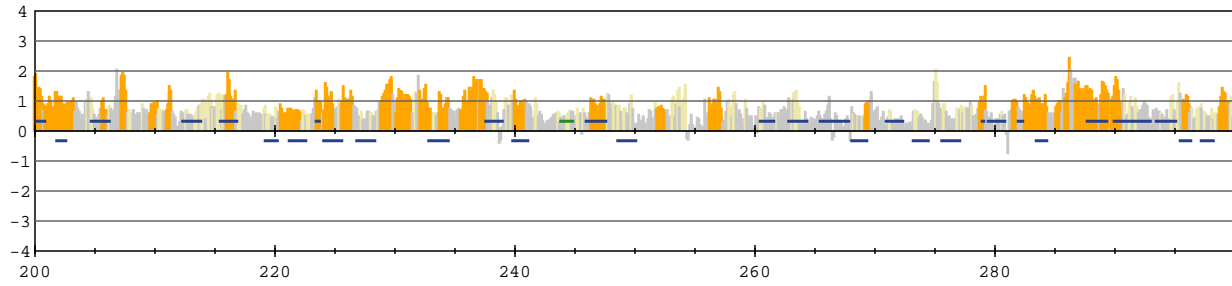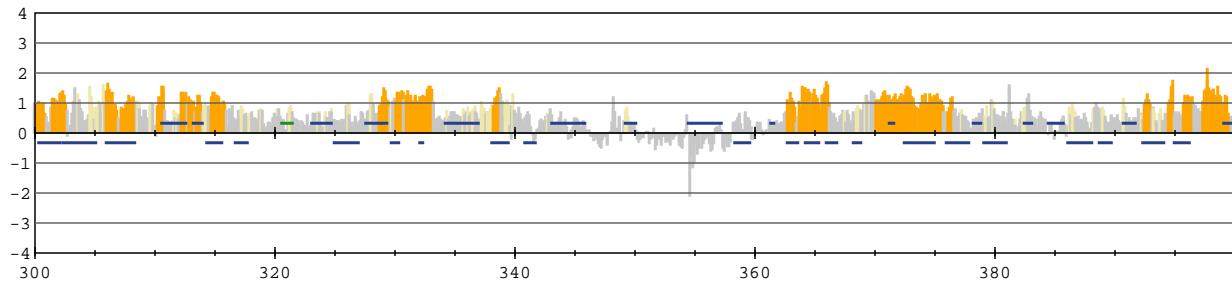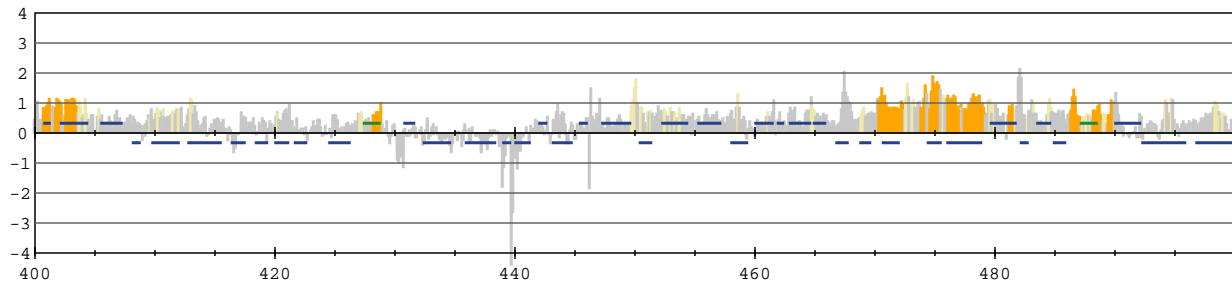

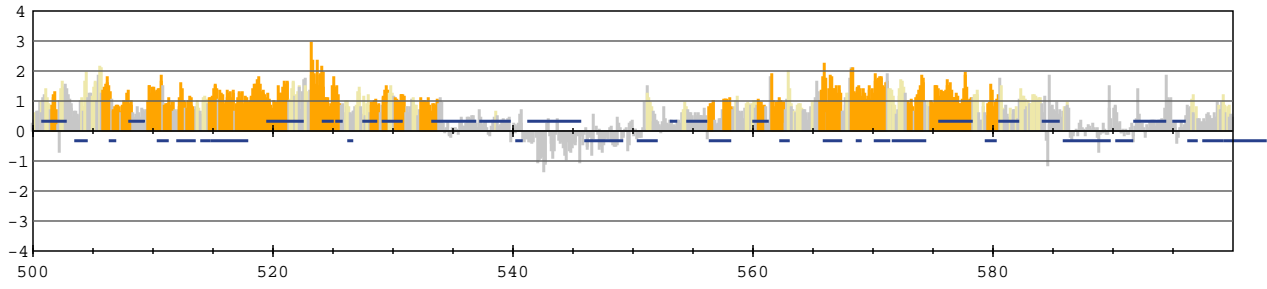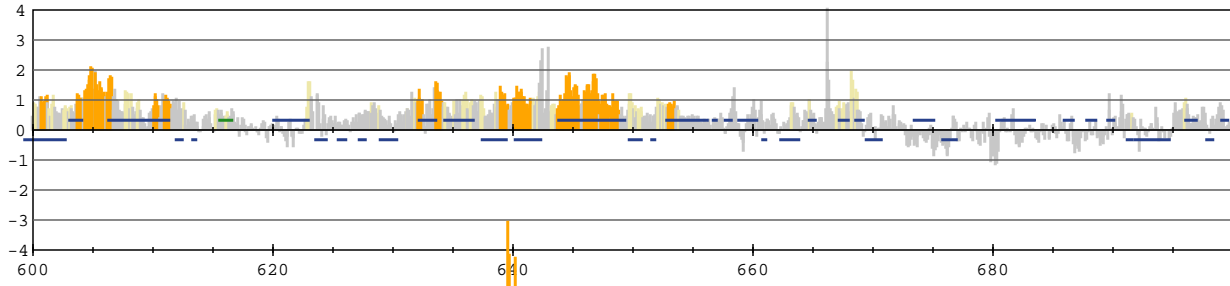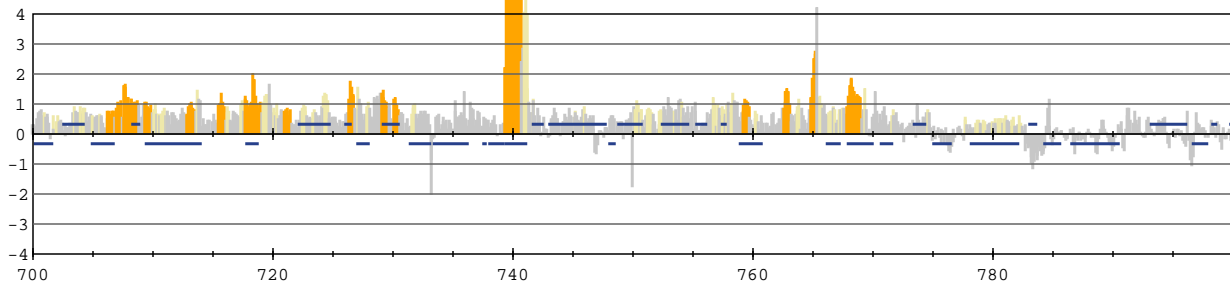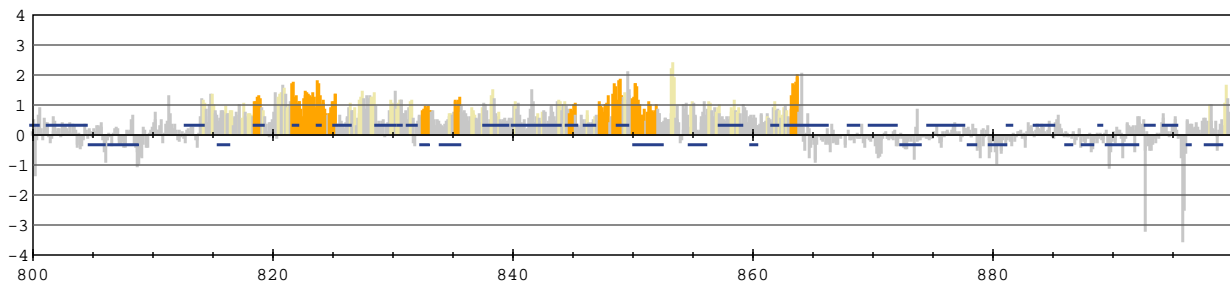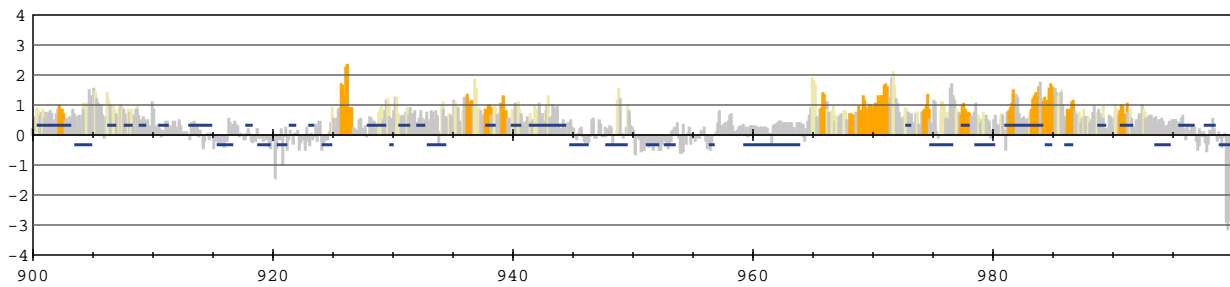



061102\_5\_WT\_HU150-061101\_3\_delcds1\_WCE\_0.001\_chr3

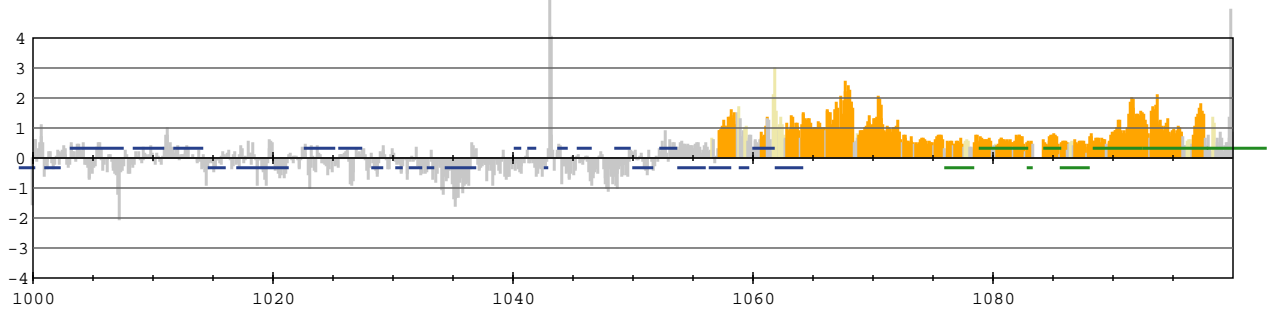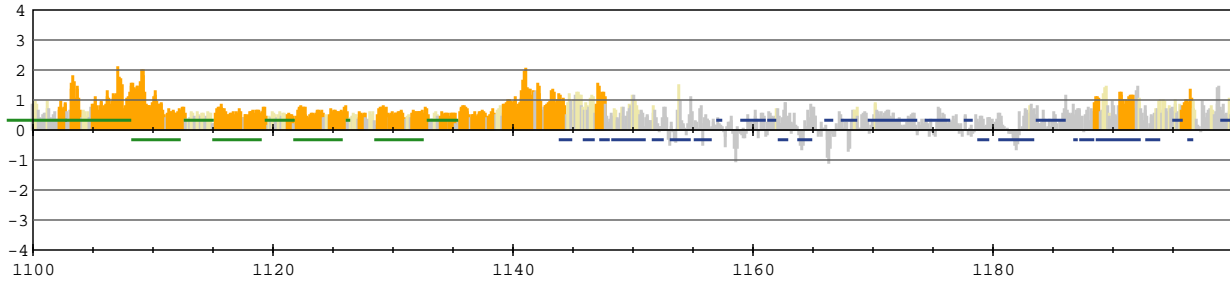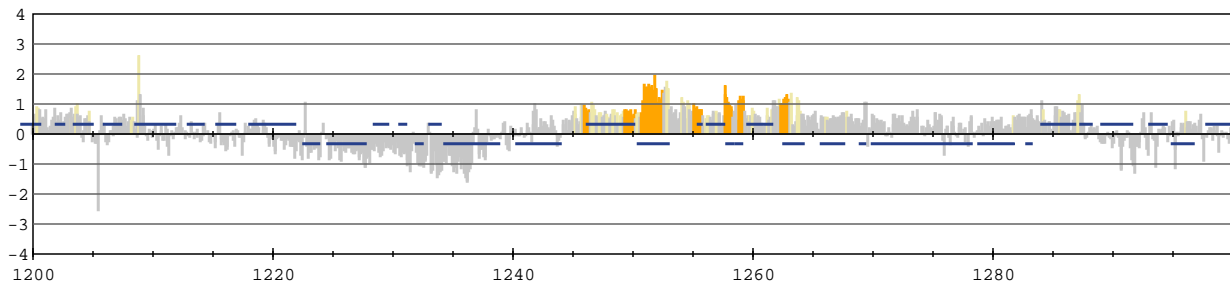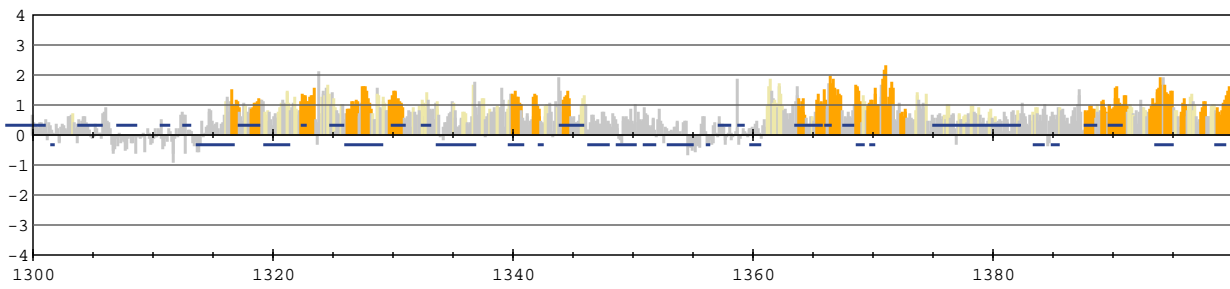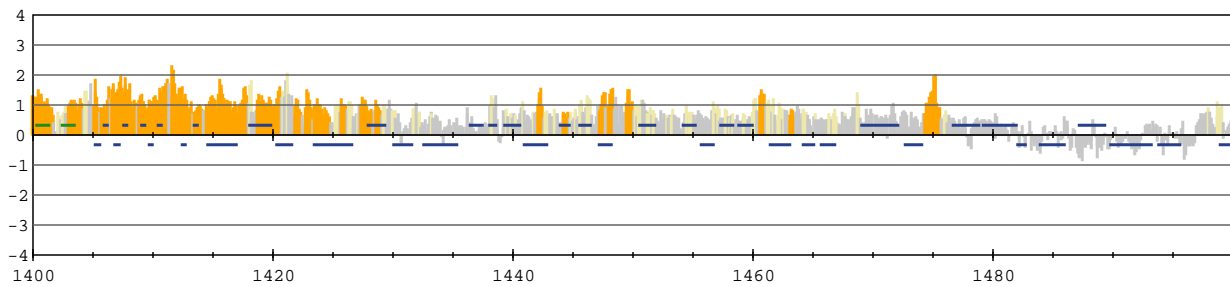

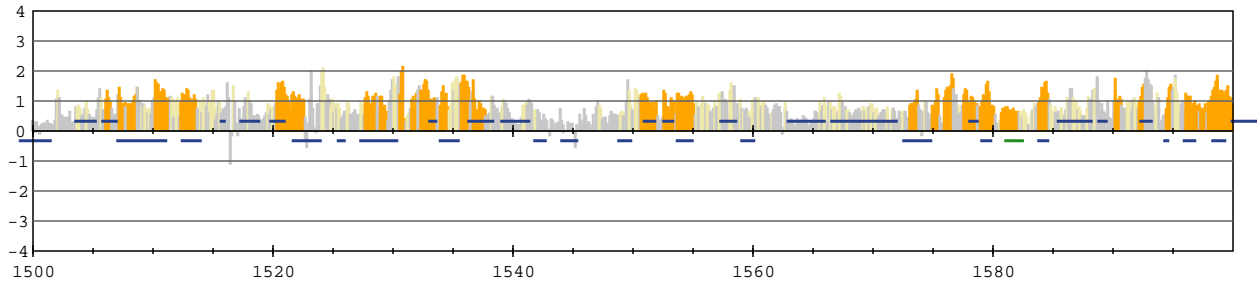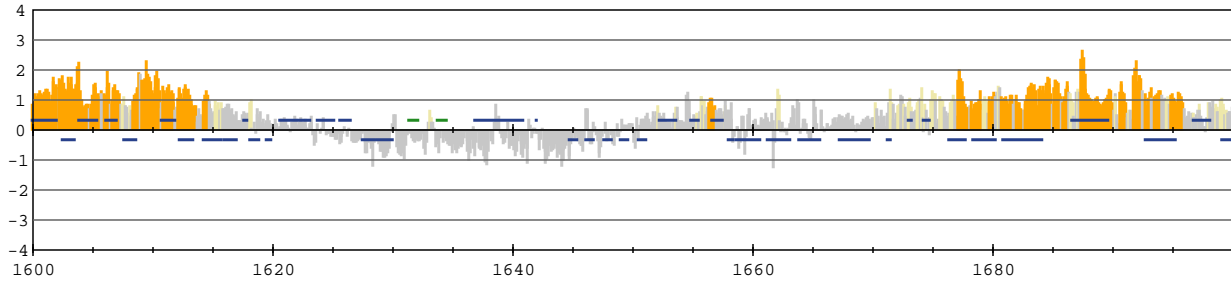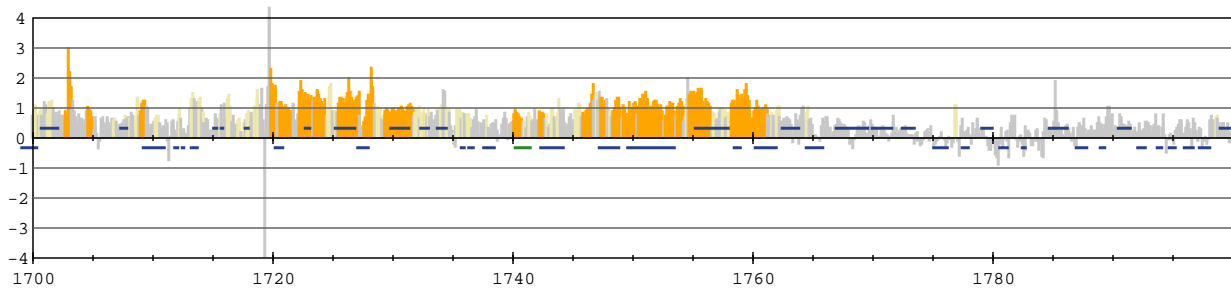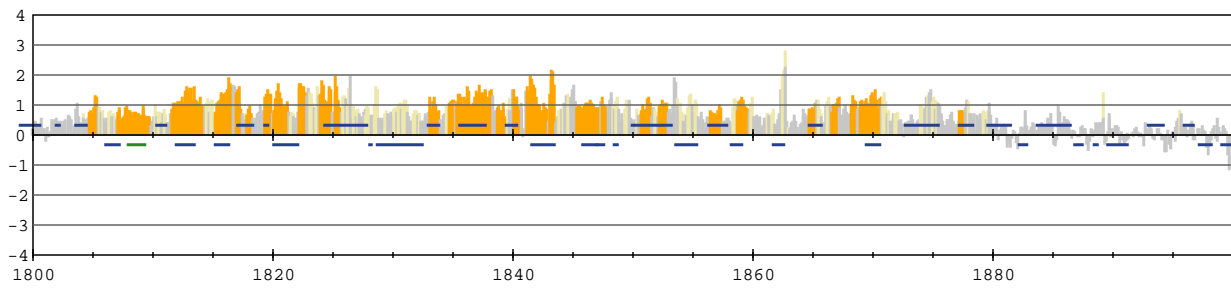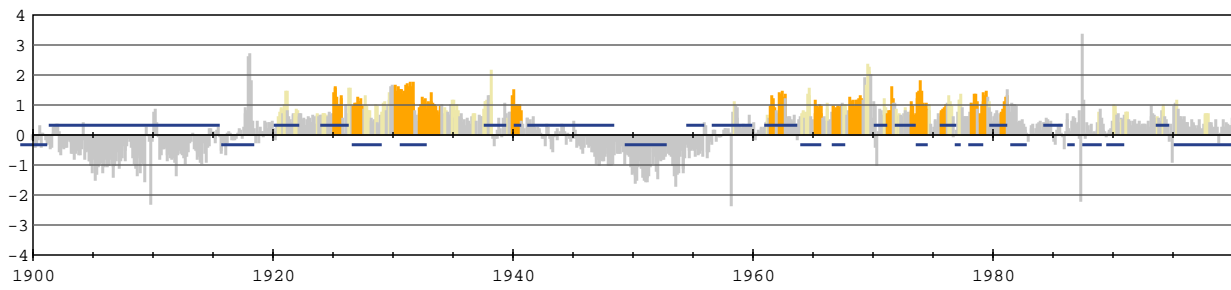

061102\_5\_WT\_HU150-061101\_3\_delcds1\_WCE\_0.001\_chr3

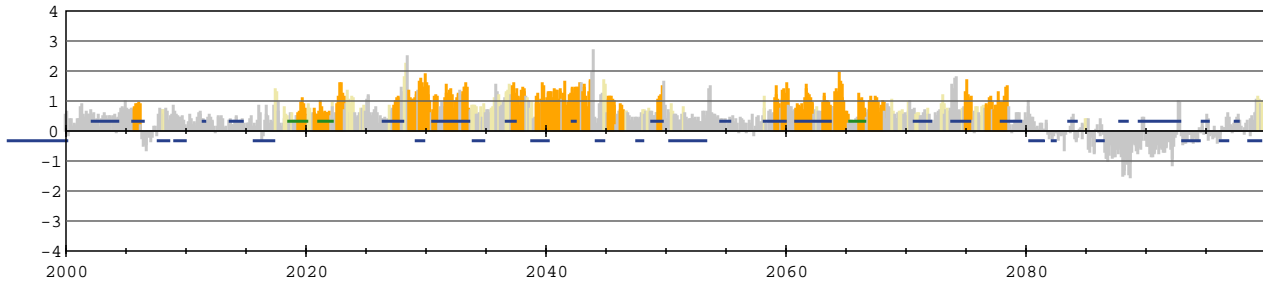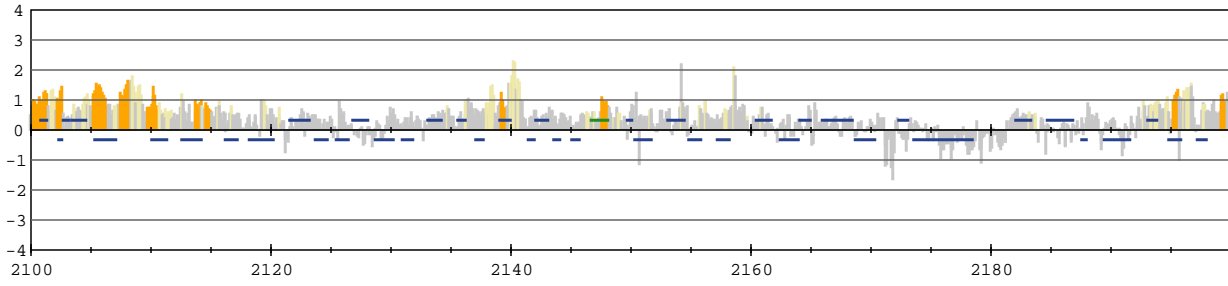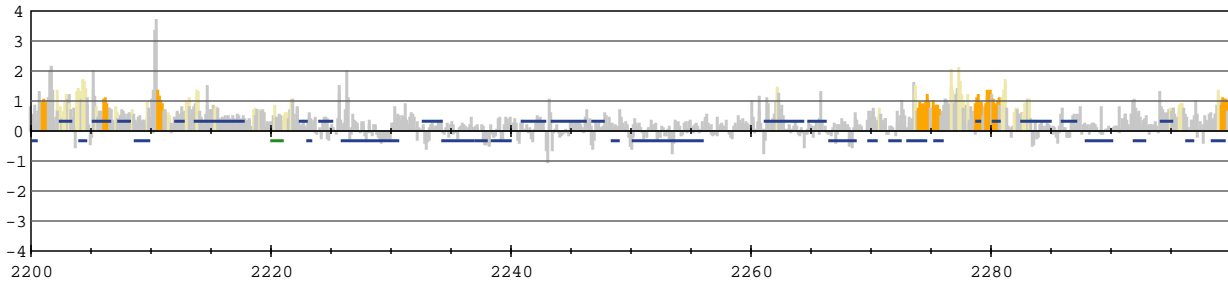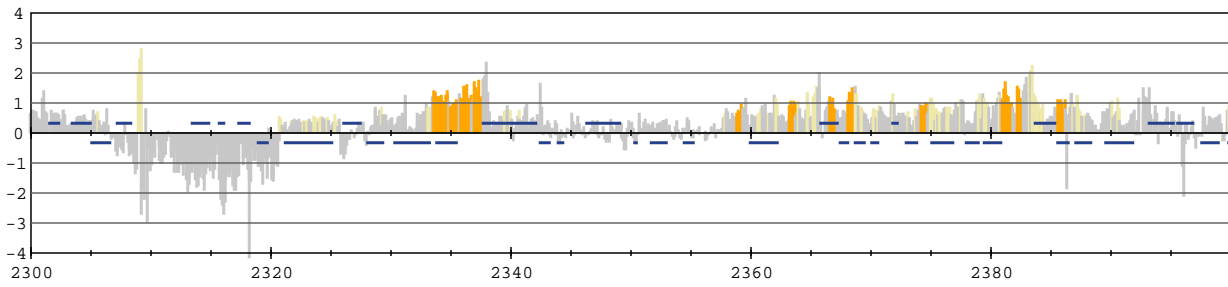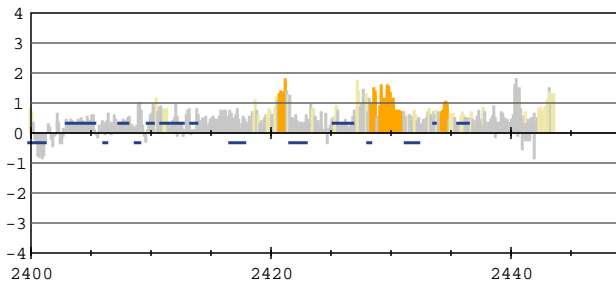

Supplement: 7601585s7.pdf [file 7601585s7.pdf]
