# Supplementary material
Source: PubMed Central journal article supplement (PMC1817633)
Supplement: 7601585s12.pdf [file 7601585s12.pdf]

**Supplementary Table S1** *S. pombe* origins of replication identified in this study

| Chromosome I |       |                  |                                          |                                         |                                             |                    |                                             |                   |          |                   |                     |                   |
|--------------|-------|------------------|------------------------------------------|-----------------------------------------|---------------------------------------------|--------------------|---------------------------------------------|-------------------|----------|-------------------|---------------------|-------------------|
| Ori Number   | Class | Cds1 Suppression | Bioinfo Number (Segurado <i>et al.</i> ) | ORIs Number (Heichinger <i>et al.</i> ) | ORF Microarray Number (Feng <i>et al.</i> ) |                    | ARS/2D-gel Number (Segurado <i>et al.</i> ) | Map Position (bp) |          | Orc4 localization | 5' Gene/ORF         | 3' Gene/ORF       |
|              |       |                  |                                          |                                         | wt (HU)                                     | $\Delta$ cds1 (HU) |                                             | Orc1              | Mcm6     |                   |                     |                   |
| 1001         | L     | Yes              |                                          |                                         |                                             |                    |                                             | 15375.5           | 15375.5  | +                 | SPAC212.07c         | SPAC212.06c       |
| 1002         | L     | Yes              |                                          |                                         |                                             |                    |                                             | 51625.5           | *        | +                 | SPAC977.09c         | SPAC977.10        |
| 1003         | L     | Yes              |                                          |                                         |                                             |                    |                                             | 54625.5           | 55375.5  | +                 | SPAC977.10          | SPAC977.11        |
| 1004         | L     | Yes              | 1011                                     |                                         |                                             |                    |                                             | 63375.5           | 62875.5  | +                 | SPAC977.14c         | SPAC977.15        |
| 1005         | L     | Yes              | 1012                                     |                                         |                                             |                    |                                             | 71125.5           | *        | +                 | SPAC977.17          | SPAPJ695.01c      |
| 1006         | L     | Yes              |                                          |                                         |                                             |                    |                                             | 75375.5           | 75375.5  | +                 |                     |                   |
| 1007         | L     | Yes              | 1013                                     |                                         |                                             |                    |                                             | 80125.5           | *        | +                 | SPAPJ695.01c        | ght3/SPAC1F8.01   |
| 1008         | L     | Yes              | 1014                                     |                                         |                                             | 1001               |                                             | 85625.5           | *        | +                 | ght3/SPAC1F8.01     | SPAC1F8.02c       |
| 1009         | L     | Yes              |                                          |                                         |                                             |                    |                                             | 89125.5           | 88625.5  | +                 | SPAC1F8.02c         | str3/SPAC1F8.03c  |
| 1010         | L     |                  |                                          |                                         |                                             | 1001               |                                             | 95125.5           | 96375.5  | +                 | SPAC1F8.04c         | isp3/SPAC1F8.05   |
| 1011         | E     |                  | 1015                                     | 1002                                    |                                             | 1002               | AT1015                                      | 113875.5          | 113875.5 | +                 | SPAC11D3.03c        | SPAC11D3.04c      |
| 1012         | L     |                  |                                          |                                         |                                             |                    |                                             | 151125.5          | 150875.5 | +                 | SPAC5H10.02c        | SPAC5H10.03       |
| 1013         | L     |                  |                                          |                                         |                                             |                    | 1004                                        | 167125.5          | 166375.5 | -                 | gmh1/SPAC5H10.11    | SPAC5H10.12c      |
| 1014         | E     |                  |                                          |                                         |                                             |                    |                                             | 191125.5          | 191125.5 | +                 | SPAC13G6.08         | SPAC13G6.09       |
| 1015         | E     |                  | 1018                                     | 1004                                    | 1002                                        | 1005               |                                             | 200125.5          | 200625.5 | +                 | SPAC24B11.02        | aps1/SPAC24B11.03 |
| 1016         | L     | Yes              |                                          |                                         |                                             |                    |                                             | 239375.5          | 240875.5 | +                 | rps2601/SPAC806.03c | SPAC806.04c       |
| 1017         | L     | Yes              | 1020                                     |                                         |                                             | 1006               |                                             | 244875.5          | 245125.5 | -                 | SPAC806.04c         | SPAC806.05        |
| 1018         | L     | Yes              | 1021                                     |                                         |                                             | 1007               |                                             | 295375.5          | 295375.5 | -                 | SPAC1F5.02          | SPAC18B11.11      |
| 1019         | L     | Yes              | 1022                                     |                                         |                                             |                    |                                             | 303125.5          | 303125.5 | +                 | tup11/SPAC18B11.10  | SPAC18B11.09c     |
| 1020         | E     |                  | 1025                                     | 1008                                    | 1003                                        | 1009               |                                             | 365625.5          | 365625.5 | +                 | SPAC630.09c         | SPAC630.10        |
| 1021         | L     | Yes              | 1026                                     |                                         |                                             |                    |                                             | 411125.5          | 411375.5 | +                 | cut1/SPAC31A2.11c   | SPAC31A2.12       |
| 1022         | E     |                  | 1027                                     | 1010                                    |                                             | 1010               |                                             | 441625.5          | 441625.5 | +                 | rad32/SPAC13C5.07   | fep1/SPAC23E2.01  |
| 1023         | L     |                  |                                          |                                         |                                             |                    |                                             | 457875.5          | 457125.5 | +                 | ste7/SPAC23E2.03c   | SPAC24H6.13       |
| 1024         | E     |                  |                                          |                                         |                                             |                    |                                             | 465125.5          | 465125.5 | +                 | uba3/SPAC24H6.12c   | SPAC24H6.11c      |
| 1025         | E     |                  | 1028                                     | 1011                                    |                                             | 1011               |                                             | 474375.5          | 474375.5 | +                 | gef1/SPAC24H6.09    | SPAC24H6.08       |
| 1026         | E     |                  | 1029                                     | 1012                                    |                                             | 1012               |                                             | 490375.5          | 490625.5 | +                 | SPAC24H6.02c        | SPAPB21F2.01      |
| 1027         | E     |                  | 1030                                     | 1014                                    | 1004                                        | 1014               |                                             | 563625.5          | 563625.5 | +                 | SPAC2F7.14c         | rsm24/SPAC2F7.15  |

|      |   |     |      |           |      |      |        |           |           |   |                     |                       |
|------|---|-----|------|-----------|------|------|--------|-----------|-----------|---|---------------------|-----------------------|
| 1028 | L |     |      |           |      | 1005 |        | 593375.5  | 593125.5  | + | SPAC3H8.03          | SPAC3H8.04            |
| 1029 | L | Yes | 1031 | 1015      |      |      |        | 608625.5  | 609125.5  | + | SPAC3H8.09c         | spo20/SPAC3H8.10      |
| 1030 | L | Yes | 1032 | 1016      |      | 1015 |        | 651125.5  | 650875.5  | + | SPAC1D4.07c         | SPAC1D4.08            |
| 1031 | E |     | 1033 | 1018/1019 | 1007 | 1016 | ORI 12 | 716125.5  | 715875.5  | + | sxa2/SPAC1296.03c   | SPAC1296.04           |
| 1032 | L |     |      |           |      |      |        | 741125.5  | 739875.5  | + | SPAC22G7.05         | ura1/SPAC22G7.06c     |
| 1033 | L |     |      |           |      |      |        | 750875.5  | 750125.5  | + | SPAC22G7.07c        | ppk8/SPAC22G7.08      |
| 1034 | L |     | 1034 |           |      |      |        | 762375.5  | *         | + | SPAC4G8.03c         | SPAC4G8.15c           |
| 1035 | L |     |      |           |      |      |        | 766125.5  | 765875.5  | + |                     |                       |
| 1036 | L |     |      |           |      |      |        | 785625.5  | 784625.5  | + | atp10/SPAC4G8.11c   | SPAC4G8.12c           |
| 1037 | L |     | 1035 | 1020      | 1008 | 1017 |        | 794875.5  | 794875.5  | + | SPAC16C9.02c        | SPAC16C9.03           |
| 1038 | E |     |      | 1021      | 1009 | 1018 |        | 845375.5  | *         | + | SPAC521.02          | SPAC521.03            |
| 1039 | E |     |      |           |      |      |        | 894375.5  | 893875.5  | - | SPAC23G3.12c        | SPAC22H12.01c         |
| 1040 | E |     | 1039 | 1024      | 1010 | 1020 |        | 902875.5  | 903375.5  | + | SPAC22H12.05c       | rpc19/SPAC1687.01     |
| 1041 | L | Yes |      |           |      |      |        | 939375.5  | 939125.5  | + | ssl3/SPAC1687.18c   | SPAC1687.19c          |
| 1042 | E |     | 1040 | 1025      | 1011 | 1021 |        | 966125.5  | 966875.5  | + | byr4/SPAC222.10c    | hem13/SPAC222.11      |
| 1043 | L |     | 1041 |           |      | 1022 | AT1041 | 1028625.5 | 1028125.5 | + | fap2/SPAC139.04c    | SPAC139.05            |
| 1044 | E |     | 1042 | 1028      |      |      |        | 1080125.5 | 1080375.5 | + | plb1/SPAC1A6.04c    | SPAC1A6.05c           |
| 1045 | E |     |      |           | 1013 | 1023 |        | 1084125.5 | 1084375.5 | - | meu31/SPAC1A6.06c   | SPAC1A6.07            |
| 1046 | E |     | 1043 | 1029      | 1013 | 1023 |        | 1091125.5 | 1091375.5 | + | lag1/SPAC1A6.09c    | SPAC30D11.15c         |
| 1047 | E |     | 1044 | 1030      |      |      | ars1   | 1097125.5 | 1097125.5 | + | hus5/SPAC30D11.13   | rpl3802/SPAC30D11.12  |
| 1048 | L |     | 1045 |           |      | 1024 |        | 1148875.5 | 1148875.5 | + | SPAC56F8.12         | SPAC56F8.13           |
| 1049 | E |     | 1046 | 1032      |      | 1025 |        | 1157375.5 | 1157625.5 | + | esc1/SPAC56F8.16    | pso2/SPAC22A12.01c    |
| 1050 | E |     |      |           |      |      |        | 1163375.5 | 1162875.5 | - | csn4/SPAC22A12.03c  | rps2201/SPAC22A12.04c |
| 1051 | E |     |      | 1033      | 1014 | 1026 |        | 1191875.5 | 1192125.5 | + | SPAC22A12.17c       | SPAC4C5.01            |
| 1052 | E |     | 1047 | 1034      |      |      |        | 1197375.5 | 1197125.5 | + | ryh1/SPAC4C5.02c    | SPAC4C5.03            |
| 1053 | E |     |      |           |      | 1027 |        | 1226375.5 | 1226375.5 | + | psm3/SPAC10F6.09c   | SPAC10F6.10           |
| 1054 | E |     | 1048 | 1035      | 1015 | 1028 |        | 1255875.5 | 1255875.5 | + | cut6/SPAC56E4.04c   | SPAC56E4.05           |
| 1055 | E |     | 1049 | 1036      | 1016 | 1029 |        | 1275875.5 | 1276125.5 | + | csn2/SPAPB17E12.04c | rpl3703/SPAPB17E12.05 |
| 1056 | L | Yes | 1050 |           |      |      |        | 1360625.5 | 1360625.5 | + | fin1/SPAC19E9.02    | pas1/SPAC19E9.03      |
| 1057 | E |     | 1052 | 1041      | 1019 | 1034 |        | 1445125.5 | 1445125.5 | + | SPAC3A12.13c        | cam1/SPAC3A12.14      |
| 1058 | E |     | 1053 | 1043      | 1020 | 1035 |        | 1477625.5 | 1477625.5 | + | SPAC9.07c           | SPAC9.08c             |

|      |   |                  |      |      |      |      |              |           |           |           |                     |                    |
|------|---|------------------|------|------|------|------|--------------|-----------|-----------|-----------|---------------------|--------------------|
| 1059 | L |                  |      |      | 1021 | 1036 |              | 1499875.5 | *         | +         | SPAC5D6.09c         | mes1/SPAC5D6.08c   |
| 1060 | E |                  | 1055 | 1046 |      |      |              | 1510125.5 | 1509875.5 | +         | SPAC5D6.04          | SPAC5D6.02c        |
| 1061 | E | Yes <sup>f</sup> |      | 1047 | 1022 | 1038 |              | 1574125.5 | 1575125.5 | +         | SPAC23H4.19         | rbx1/SPAC23H4.18c  |
| 1062 | L | Yes              |      |      |      |      |              | 1600375.5 | 1600125.5 | +         | gln1/SPAC23H4.06    | SPAC23H4.05c       |
| 1063 | E |                  | 1056 | 1049 |      |      |              | *         | *         | +         | msc1/SPAC343.11c    | rds1/SPA343.12     |
| 1064 | E |                  |      |      |      | 1024 | 1039         |           | 1667375.5 | 1667625.5 |                     |                    |
| 1065 | E |                  | 1057 | 1050 |      | 1040 |              | 1709125.5 | 1709125.5 | +         | SPAC664.02c         | SPAC664.03         |
| 1066 | E |                  |      | 1051 |      |      |              | 1719625.5 | 1719625.5 | +         | SPAC664.08c         | ggt1/SPAC664.09    |
| 1067 | L |                  | 1059 |      |      |      |              | 1766125.5 | 1768125.5 | +         | ulp2/SPAC17A5.07c   | SPAC17A5.08        |
| 1068 | L |                  |      |      |      |      |              | 1823875.5 | *         | -         | psu1/SPAC1002.13c   | SPAC1002.20        |
| 1069 | E |                  | 1061 | 1054 |      | 1043 |              | 1834875.5 | 1835125.5 | +         | SPAC1002.18         | SPAC1002.21        |
| 1070 | L | Yes              |      |      | 1028 | 1045 |              | 1892625.5 | *         | +         | SPAPB1A10.14        | SPAPB1A10.15       |
| 1071 | L | Yes              | 1062 |      | 1028 | 1045 |              | 1894875.5 | 1895625.5 | +         | SPAPB1A10.15        | sdh2/SPAC140.01    |
| 1072 | L |                  |      |      |      |      |              | 1947375.5 | 1947125.5 | +         | SPAC3H1.08c         | SPAC3H1.09c        |
| 1073 | L | Yes              | 1063 |      |      |      |              | 1954875.5 | 1954875.5 | +         | SPAC3H1.10          | SPAC3H1.11         |
| 1074 | L | Yes              |      |      |      |      |              | *         | 1959375.5 | +         |                     |                    |
| 1075 | E |                  | 1064 | 1056 | 1030 | 1047 |              | 1975875.5 | 1975875.5 | +         | rpl3001/SPAC9G1.03c | oxa101/SPAC9G1.04  |
| 1076 | L | Yes              |      |      |      | 1048 |              | 2026125.5 | 2026125.5 | +         | ddb1/SPAC17H9.10c   | SPAC17H9.11        |
| 1077 | L |                  | 1065 | 1057 |      | 1049 |              | 2042875.5 | 2042875.5 | +         | snu13/SPAC607.03c   | SPAC607.04         |
| 1078 | L | Yes              | 1067 | 1059 |      |      |              | 2097125.5 | 2096875.5 | +         | obr1/SPAC3C7.14c    | SPAC25A8.03c       |
| 1079 | L | Yes              | 1068 | 1061 |      | 1051 |              | 2141375.5 | 2141125.5 | +         | pnk1/SPAC23C11.04c  | SPAC23C11.05       |
| 1080 | E |                  | 1069 |      | 1032 | 1052 |              | 2195375.5 | 2195125.5 | +         | hst4/SPAC1783.04c   | hrp1/SPAC1783.05   |
| 1081 | E |                  | 1070 | 1063 | 1033 | 1053 | ORI 18/ORI J | 2228875.5 | 2228875.5 | +         | SPAC18G6.05c        | SPAC18G6.06        |
| 1082 | L |                  |      |      |      |      |              | 2233125.5 | 2233125.5 | +         | mra1/SPAC18G6.07c   | SPAC18G6.09c       |
| 1083 | E |                  | 1073 | 1066 | 1034 | 1054 |              | 2250625.5 | 2250625.5 | +         | byr3/SPAC13D6.02c   | SPAC13D6.03c       |
| 1084 | L |                  |      | 1067 |      |      |              | 2263875.5 | 2264125.5 | -         | SPAC4G9.06c         | B8647-3/SPAC4G9.07 |
| 1085 | E |                  |      |      |      | 1055 |              | 2274625.5 | 2274375.5 | +         | arg11/SPAC4G9.09c   | arg3/SPAC4G9.10    |
| 1086 | E |                  | 1074 | 1068 |      | 1055 |              | 2280875.5 | 2280875.5 | +         | vps26/SPAC4G9.13c   | SPAC4G9.14         |
| 1087 | L | Yes              |      |      | 1035 | 1056 |              | 2305125.5 | 2305625.5 | +         | mac1/SPAC13G7.04c   | SPAC13G7.05        |
| 1088 | L | Yes              | 1077 | 1072 | 1036 | 1057 |              | 2340375.5 | 2340625.5 | +         | SPAC6C3.08          | SPAC6C3.09         |
| 1089 | L |                  |      |      |      |      |              | 2363375.5 | 2363875.5 | +         | SPAC17G8.11c        | SPAC17G8.12        |

|      |   |                  |      |      |      |      |        |           |           |   |                    |                    |
|------|---|------------------|------|------|------|------|--------|-----------|-----------|---|--------------------|--------------------|
| 1090 | L | Yes              | 1079 |      |      |      |        | 2406875.5 | 2407125.5 | + | sck1/SPAC1B9.02c   | SPAC1B9.03c        |
| 1091 | L | Yes              |      |      |      |      |        | 2417125.5 | 2416625.5 | + | SPAC6B12.03c       | SPAC6B12.04c       |
| 1092 | E |                  | 1080 | 1075 |      |      | rip1   | 2439375.5 | 2439375.5 | + | SPAC6B12.14c       | cpc2/SPAC6B12.15   |
| 1093 | E |                  | 1081 | 1075 | 1037 | 1059 |        | 2442875.5 | 2442875.5 | + | cpc2/SPAC6B12.15   | meu26/SPAC6B12.16  |
| 1094 | E |                  | 1082 | 1076 |      |      |        | 2452875.5 | 2452625.5 | + | SPAC32A11.02c      | phx1/SPAC32A11.03c |
| 1095 | E |                  |      | 1076 |      |      |        | 2457125.5 | 2458125.5 | + | phx1/SPAC32A11.03c | trp2/SPAC19A8.15   |
| 1096 | L |                  |      |      |      |      |        | 2510125.5 | 2511125.5 | - | gly1/SPAC23H3.09c  | ssr2/SPAC23H3.10   |
| 1097 | L | Yes              |      |      |      | 1061 |        | 2526375.5 | 2526375.5 | + | SPAC25H1.01c       | jmj1/SPAC25H1.02   |
| 1098 | L | Yes              |      |      |      |      |        | 2528625.5 | 2528625.5 | + | jmj1/SPAC25H1.02   | mug66/SPAC25H1.03  |
| 1099 | E |                  |      | 1078 |      | 1062 |        | 2579125.5 | 2579375.5 | + | prs1/SPAC4A8.14    | cdc3/SPAC4A8.15c   |
| 1100 | L |                  |      |      |      | 1063 |        | 2601125.5 | 2601375.5 | + | SPAC823.11         | SPAC823.12         |
| 1101 | L |                  |      |      | 1039 | 1064 |        | 2615875.5 | 2615625.5 | - | SPAC7D4.13c        | SPAC7D4.12c        |
| 1102 | L |                  | 1085 | 1079 |      |      |        | 2618875.5 | 2618625.5 | - | SPAC7D4.12c        | sec39/SPAC7D4.11c  |
| 1103 | L | Yes <sup>f</sup> | 1086 | 1080 | 1040 | 1065 |        | 2644125.5 | 2644125.5 | + | itr1/SPAC4F8.15    | hcs1/SPAC4F8.14c   |
| 1104 | L | Yes              | 1088 | 1081 |      | 1066 |        | 2668625.5 | *         | - | hxx2/SPAC4F8.07c   | SPAC4F8.06         |
| 1105 | E | Yes <sup>f</sup> | 1090 | 1082 | 1042 | 1067 |        | 2720625.5 | 2720625.5 | + | SPAPB2B4.04c       | vma5/SPAPB2B4.05   |
| 1106 | E |                  | 1092 | 1084 | 1043 | 1068 |        | 2762625.5 | 2762625.5 | + | SPAC6F6.13c        | ypt5/SPAC6F6.15    |
| 1107 | E |                  |      | 1086 | 1045 | 1069 |        | 2804375.5 | 2804375.5 | + | SPAC1805.16c       | crm1/SPAC1B2.01    |
| 1108 | L | Yes              |      |      |      | 1072 |        | 2875625.5 | 2876125.5 | + | SPACUNK4.17        | SPACUNK4.19        |
| 1109 | L | Yes              | 1094 | 1089 |      | 1072 |        | 2883875.5 | 2883625.5 | + | SPACUNK4.15        | SPACUNK4.14        |
| 1110 | E |                  |      |      |      |      |        | 2938875.5 | 2938625.5 | + | SPAC2E1P3.05c      | SPAPB2C8.01        |
| 1111 | E |                  | 1095 | 1091 |      |      |        | 2960625.5 | 2961125.5 | + | SPAPB24D3.07c      | SPAPB24D3.08c      |
| 1112 | E |                  |      |      | 1050 | 1074 |        | 2978125.5 | 2978125.5 | + | agl1/SPAPB24D3.10c | SPAPB1A11.01       |
| 1113 | E |                  |      |      | 1050 | 1074 |        | *         | 2980625.5 | + | SPAPB1A11.01       | SPAPB1A11.02       |
| 1114 | E |                  |      | 1092 | 1050 | 1074 |        | 2984125.5 | 2984125.5 | + | SPAPB1A11.02       | SPAPB1A11.03       |
| 1115 | E |                  | 1096 | 1093 | 1051 | 1075 |        | 3010875.5 | 3010875.5 | + | maf1/SPAC31G5.12c  | SPAC31G5.21        |
| 1116 | E |                  | 1097 | 1094 | 1051 | 1075 |        | 3023625.5 | 3022875.5 | + | SPAC31G5.18c       | SPAC31G5.19        |
| 1117 | E |                  |      |      |      |      |        | 3032125.5 | 3034125.5 | + | SPAC1786.01c       | SPAC1786.04        |
| 1118 | E |                  |      |      |      |      |        | 3053875.5 | 3053625.5 | + | SPAC24C9.06c       | bgs2/SPAC24C9.07c  |
| 1119 | E |                  | 1098 | 1095 | 1052 | 1076 | ORI 76 | 3060875.5 | 3061125.5 | + | bgs2/SPAC24C9.07c  | SPAC24C9.08        |
| 1120 | L |                  |      |      |      |      |        | 3071125.5 | *         | - | SPAC24C9.11        | SPAC24C9.12c       |

|      |    |     |           |           |      |      |         |           |           |   |                    |                     |
|------|----|-----|-----------|-----------|------|------|---------|-----------|-----------|---|--------------------|---------------------|
| 1121 | E  |     | 1099      | 1096      | 1054 | 1078 |         | 3127875.5 | 3127875.5 | + | srb8/SPAC688.08    | SPAC688.09          |
| 1122 | E  |     | 1100      | 1097      |      | 1079 |         | 3145375.5 | 3145375.5 | + | SPAC688.14         | bet5/SPAC3G9.16c    |
| 1123 | L  | Yes |           |           |      |      |         | 3159375.5 | 3159375.5 | + | peg1/SPAC3G9.12    | SPAC3G9.11c         |
| 1124 | E  |     | 1101      | 1098      | 1055 | 1080 |         | 3185375.5 | 3185375.5 | + | SPAC3G9.01         | SPAC1486.01         |
| 1125 | E  |     | 1104      | 1101      |      |      |         | 3301625.5 | 3301625.5 | + | eme1/SPAPB1E7.06c  | SPAPB1E7.07         |
| 1126 | E  |     | 1105      | 1102      | 1058 | 1085 | pARS767 | 3321875.5 | 3321875.5 | + | rps602/SPAPB1E7.12 | mns1/SPAC2E1P5.01c  |
| 1127 | E  |     | 1106      | 1103      | 1059 | 1087 |         | 3405625.5 | 3405875.5 | + | apc5/SPAC959.09c   | SPAP32A8.02         |
| 1128 | E  |     | 1107      | 1104      | 1060 |      |         | 3411375.5 | 3411375.5 | + | SPAP32A8.03c       | rpl501/SPAC3H5.12c  |
| 1129 | E  |     | 1109      | 1107      | 1062 | 1090 | ORI c27 | 3499125.5 | 3499125.5 | + | rps502/SPAC328.10c | SPAC16E8.01         |
| 1130 | E  |     | 1110      |           | 1063 | 1091 |         | 3542125.5 | 3542125.5 | - | SPAC1B1.02c        | kap95/SPAC1B1.03c   |
| 1131 | E  |     | 1111      | 1109      |      |      |         | 3549625.5 | 3549625.5 | + | SPAC1B1.04c        | bsu1/SPAC17A2.01    |
| 1132 | E  |     | 1112      | 1110      |      |      |         | 3571375.5 | 3570625.5 | + | SPAC17A2.15        | csx1/SPAC17A2.09c   |
| 1133 | E  |     | 1114      | 1110      |      |      |         | 3577625.5 | 3577875.5 | + | SPAC17A2.10c       | SPAC17A2.11         |
| 1134 | E  |     |           |           |      |      |         | *         | *         | + | SPAC17A2.11        | SPAC17A2.12         |
| 1135 | E  |     |           |           |      |      |         | 3592875.5 | 3593375.5 | + | SPAC17G6.02c       | SPAC17G6.03         |
| 1136 | E  |     |           |           |      | 1092 |         | 3611375.5 | 3612625.5 | + | SPAC17G6.11c       | cul1/SPAC17G6.12    |
| 1137 | E  |     | 1115      | 1112      | 1065 | 1093 |         | 3635625.5 | 3635625.5 | + | SPAC1142.04        | ctr5/SPAC1142.05    |
| 1138 | E' |     |           |           |      |      |         | 3646125.5 | 3647125.5 | + | cgs1/SPAC8C9.03    | SPAC8C9.04          |
| 1139 | E  |     | 1116      | 1114      | 1066 | 1094 |         | 3701375.5 | 3701625.5 | + | mde6/SPAC15A10.10  | ubr11/SPAC15A10.11  |
| 1140 | E  |     |           |           |      |      |         | 3746875.5 | 3749875.5 | + | rpl1002/SPAP7G5.05 | SPAP7G5.06          |
| 1141 | E  |     |           | 1117/1118 |      | 1096 |         | 3753625.5 | 3753625.5 | + | SPAP7G5.06         | centromere          |
| 1142 | E  |     |           | 1122      | 1069 | 1097 |         | 3841125.5 | 3841375.5 | + | SPAC4H3.07c        | SPAC4H3.08          |
| 1143 | E  |     | 1124      | 1123      |      |      |         | 3853375.5 | 3853375.5 | + | SPAC4H3.12c        | SPAC4H3.13          |
| 1144 | E  |     |           |           |      |      |         | 3878875.5 | 3879375.5 | + |                    |                     |
| 1145 | E  |     | 1125/1126 | 1126      | 1071 | 1098 |         | 3882875.5 | *         | + | pma1/SPAC1071.10c  | SPAC1071.11         |
| 1146 | E  |     | 1127      | 1127      |      |      |         | 3898625.5 | 3898875.5 | + | SPAC926.07c        | SPAC926.08c         |
| 1147 | E  |     | 1128      | 1128      | 1072 | 1099 |         | 3954125.5 | 3953875.5 | + | SPAC2F3.14c        | lsk1/SPAC2F3.15     |
| 1148 | E  |     |           | 1129      | 1174 | 1100 |         | 3992875.5 | 3992875.5 | + | SPAPB15E9.01c      | SPAPB15E9.02c       |
| 1149 | E  |     | 1129      |           | 1174 | 1100 |         | 3995875.5 | 3995875.5 | + | SPAPB15E9.02c      | Tf2-5/SPAPB15E9.03c |
| 1150 | L  |     |           |           |      |      |         | 4010625.5 | 4010125.5 | + | SPAC27E2.03c       | SPAC27E2.11c        |
| 1151 | E  |     | 1130      | 1130      | 1075 | 1101 |         | 4020125.5 | 4020375.5 | + | SPAC27E2.06c       | pvg2/SPAC27E2.07    |

|      |    |      |      |      |      |      |        |           |           |   |                    |                    |
|------|----|------|------|------|------|------|--------|-----------|-----------|---|--------------------|--------------------|
| 1152 | E  |      | 1131 | 1131 | 1076 | 1102 | ORI 19 | 4073125.5 | 4072375.5 | + | SPAC19G12.13c      | its3/SPAC19G12.14  |
| 1153 | E  |      | 1132 | 1132 | 1077 | 1103 |        | 4089125.5 | 4089125.5 | + | mnl1/SPAC23A1.04c  | SPAC23A1.05        |
| 1154 | E  |      | 1133 | 1133 | 1078 | 1104 |        | 4137375.5 | 4137375.5 | + | bgl2/SPAC26H5.08c  | SPAC26H5.09c       |
| 1155 | E  |      |      |      |      |      |        | 4141125.5 | 4141125.5 | + | SPAC26H5.09c       | tif51/SPAC26H5.10c |
| 1156 | E  |      |      |      | 1079 | 1105 |        | 4154625.5 | 4154625.5 | + | SPAC26H5.13c       | SPAC25B8.01        |
| 1157 | L  |      |      |      |      |      |        | 4178125.5 | *         | - | SPAC25B8.11        | SPAC25B8.12c       |
| 1158 | L  |      |      |      |      |      |        | 4180875.5 | 4180625.5 | + | SPAC25B8.12c       | isp7/SPAC25B8.13c  |
| 1159 | E  |      | 1134 | 1134 | 1081 | 1106 |        | 4185875.5 | 4185875.5 | + | isp7/SPAC25B8.13c  | mal2/SPAC25B8.14   |
| 1160 | E  |      |      | 1135 |      |      |        | 4197625.5 | 4197875.5 | + | SPAC683.03         | SPAC683.02c        |
| 1161 | E  |      |      |      | 1082 | 1107 |        | 4232625.5 | 4232625.5 | + | SPAC1F7.06         | fip1/SPAC1F7.07c   |
| 1162 | E  |      |      |      |      |      |        | 4240125.5 | 4239875.5 | + | fio1/SPAC1F7.08    | SPAC1F7.09c        |
| 1163 | E  |      | 1135 | 1136 |      |      | pcr1   | 4255125.5 | 4255125.5 | + | pcr1/SPAC21E11.03c | ppr1/SPAC21E11.04  |
| 1164 | E  |      | 1136 | 1137 | 1083 | 1108 |        | 4275625.5 | 4275625.5 | + | SPAC2C4.07c        | SPAC2C4.08         |
| 1165 | E  |      | 1137 | 1138 | 1084 | 1110 |        | 4326625.5 | 4326875.5 | + | SPAC27F1.05c       | SPAC27F1.10        |
| 1166 | L  | Yes  | 1138 |      | 1085 | 1111 |        | 4365875.5 | 4366625.5 | + | SPAC23D3.12        | SPAC23D3.13c       |
| 1167 | L  |      |      |      |      | 1112 |        | 4387375.5 | *         | + | SPAC1527.03        | sec72/SPAC30.01c   |
| 1168 | L  | Yes* | 1139 | 1139 | 1086 | 1113 |        | 4415625.5 | 4415875.5 | + | SPAC29E6.06c       | SPAC29E6.07        |
| 1169 | E' | Yes  |      | 1140 |      | 1114 |        | 4439625.5 | 4439875.5 | + | SPAC9E9.17c        | leu2/SPAC9E9.03    |
| 1170 | L  | Yes  | 1140 |      |      | 1115 |        | 4451375.5 | 4451375.5 | + | ypt2/SPAC9E9.07c   | rad26/SPAC9E9.08   |
| 1171 | L  | Yes  |      |      |      |      |        | 4459625.5 | 4457375.5 | + | SPAC9E9.09c        | cbh1/SPAC9E9.10c   |
| 1172 | L  | Yes  |      |      |      |      |        | 4468875.5 | 4468375.5 | + | SPAC9E9.12c        | wos2/SPAC9E9.13    |
| 1173 | E  |      |      | 1141 |      | 1116 |        | 4484625.5 | 4484625.5 | + | stm1/SPAC17C9.10   | tim13/SPAC17C9.09c |
| 1174 | E  |      | 1141 | 1144 |      | 1118 |        | 4534125.5 | 4534125.5 | + | SPAC27D7.11c       | but1/SPAC27D7.12   |
| 1175 | L  | Yes  | 1142 |      |      |      |        | 4605375.5 | 4605375.5 | + | SPAC12B10.16c      | SPAC1093.01        |
| 1176 | L  |      | 1143 | 1149 |      | 1120 |        | 4653375.5 | 4653625.5 | + | SPAC144.01         | SPAC144.02         |
| 1177 | L  | Yes  |      | 1150 | 1090 | 1121 |        | 4674875.5 | 4675125.5 | + | gwt1/SPAC144.10c   | rps1102/SPAC144.11 |
| 1178 | E  |      | 1145 | 1152 | 1091 | 1123 |        | 4740375.5 | 4740375.5 | + | SPAC458.04c        | plk3/SPAC458.05    |
| 1179 | E  | Yes  | 1146 | 1153 | 1092 | 1124 |        | 4779625.5 | 4779625.5 | + | SPAC11H11.02c      | SPAC11H11.03c      |
| 1180 | E' |      |      |      |      | 1125 |        | 4803875.5 | 4803875.5 | + | SPAC22F8.08        | rrp16/SPAC22F8.09  |
| 1181 | E  |      |      | 1155 |      | 1127 |        | 4845625.5 | 4845125.5 | + | atg13/SPAC4F10.07c | SPAC4F10.08        |
| 1182 | E  |      | 1147 | 1156 |      |      |        | 4853375.5 | 4853625.5 | + | SPAC4F10.10c       | spn1/SPAC4F10.11   |

|      |    |     |      |      |      |      |        |           |           |   |                     |                      |
|------|----|-----|------|------|------|------|--------|-----------|-----------|---|---------------------|----------------------|
| 1183 | E' | Yes | 1148 |      | 1094 | 1128 |        | 4883125.5 | 4882875.5 | + | SPAC19B12.02c       | bgs3/SPAC19B12.03    |
| 1184 | L  |     |      |      |      |      |        | 4912375.5 | 4913125.5 | + | rpn502/SPAPB8E5.02c | mae1/SPAPB8E5.03     |
| 1185 | E  |     |      | 1158 |      | 1129 |        | 4917375.5 | 4917625.5 | + | SPAPB8E5.04c        | mfm1/SPAPB8E5.05     |
| 1186 | E  |     | 1149 | 1160 |      |      |        | 4964125.5 | 4964125.5 | + | vht1/SPAC1B3.16c    | clr2/SPAC1B3.17      |
| 1187 | L  |     |      |      |      |      |        | 4985625.5 | 4984875.5 | + | SPAC1952.09c        | SPAC1952.10c         |
| 1188 | E  |     | 1152 | 1162 | 1096 | 1132 | ORI 22 | 5025375.5 | 5025375.5 | + | SPAC22E12.03c       | ccs1/SPAC22E12.04    |
| 1189 | L  |     | 1154 | 1164 |      | 1134 |        | 5098125.5 | 5097375.5 | + | rpl3002/SPAC1250.05 | atl1/SPAC1250.04c    |
| 1190 | E  |     | 1155 | 1166 | 1098 | 1136 |        | 5156625.5 | 5157375.5 | + | SPAC26F1.12c        | SPAC26F1.11/dubious  |
| 1191 | E  |     |      | 1167 |      |      |        | 5178625.5 | 5178625.5 | + | SPAC26F1.05         | etr1/SPAC26F1.04c    |
| 1192 | L  |     |      |      | 1100 | 1137 |        | 5190375.5 | 5190375.5 | + | SPAPJ691.02         | SPAPJ691.03          |
| 1193 | E  |     | 1156 | 1168 | 1101 | 1138 |        | 5234125.5 | 5234625.5 | + | mek1/SPAC14C4.03    | B22918-2/SPAC14C4.04 |
| 1194 | L  | Yes | 1158 |      |      |      |        | 5272375.5 | 5272375.5 | + | adg1/SPAPJ760.03c   | SPAC2H10.01          |
| 1195 | L  | Yes | 1159 | 1170 |      | 1140 |        | 5322875.5 | 5323125.5 | + | hsp9/SPAP8A3.04c    | SPAP8A3.05           |
| 1196 | E  |     | 1160 | 1171 | 1103 | 1142 |        | 5394125.5 | 5393875.5 | + | SPAC3G6.07          | erv1/SPAC3G6.08      |
| 1197 | E  |     | 1162 | 1173 |      | 1144 |        | 5449125.5 | 5449625.5 | + | SPAC1039.01         | SPAC1039.02          |
| 1198 | E' |     |      |      |      |      |        | 5470375.5 | 5470375.5 | - | isp5/SPAC1039.09    | mmf2/SPAC922.01      |
| 1199 | E  |     | 1163 | 1174 | 1104 | 1145 |        | 5477125.5 | 5476875.5 | + | SPAC1039.11c        | SPAC922.03           |
| 1200 | E' |     | 1164 | 1175 |      |      |        | 5483375.5 | 5482625.5 | - | SPAC922.04          | SPAC922.05c          |
| 1201 | L  |     |      |      |      |      |        | 5487625.5 | 5487375.5 | - | SPAC922.06          | SPAC922.07c          |
| 1202 | L  | Yes | 1166 | 1176 |      | 1146 |        | 5502625.5 | 5502875.5 | + | mel1/SPAC869.07c    | SPAC869.06c          |
| 1203 | L  | Yes | 1167 | 1176 |      |      |        | *         | 5506625.5 | + | SPAC869.06c         | SPAC869.05c          |
| 1204 | L  | Yes |      |      |      |      |        | 5510875.5 | *         | + | SPAC869.05c         | SPAC869.04           |
| 1205 | L  | Yes |      |      |      |      |        | 5517875.5 | 5516125.5 | + | SPAC869.03c         | SPAC869.02c          |
| 1206 | L  | Yes | 1168 |      |      |      |        | 5521875.5 | *         | + | SPAC869.02c         | SPAC869.01           |
| 1207 | L  | Yes | 1169 |      | 1105 | 1147 |        | 5529875.5 | *         | + | SPAC186.01          | SPAC186.02c          |

Chromosome II

| Ori Number | Class | Cds1 Suppression | Bioinfo Number (Segurado <i>et al.</i> ) | ORIs Number (Heichinger <i>et al.</i> ) | ORF Microarray Number (Feng <i>et al.</i> ) |                    | ARS/2D-gel Number (Segurado <i>et al.</i> ) | Map Position (bp) |         | Orc4 localization | 5' Gene/ORF  | 3' Gene/ORF  |
|------------|-------|------------------|------------------------------------------|-----------------------------------------|---------------------------------------------|--------------------|---------------------------------------------|-------------------|---------|-------------------|--------------|--------------|
|            |       |                  |                                          |                                         | wt (HU)                                     | $\Delta$ cds1 (HU) |                                             | Orc1              | Mcm6    |                   |              |              |
| 2001       | L     | Yes              |                                          |                                         |                                             |                    |                                             | *                 | 31375.5 | +                 | SPBC1348.10c | SPBC1348.11  |
| 2002       | L     | Yes              |                                          |                                         |                                             |                    |                                             | 38125.5           | 38125.5 | +                 | SPBC1348.13  | SPBC1348.14c |

|      |    |     |      |      |      |      |  |          |          |   |                   |                   |
|------|----|-----|------|------|------|------|--|----------|----------|---|-------------------|-------------------|
| 2003 | L  | Yes |      |      |      |      |  | 53125.5  | 53125.5  | + | grt1/SPBPB8B6.04c | SPBPB8B6.05c      |
| 2004 | L  | Yes |      |      |      |      |  | 63375.5  | 61875.5  | + | SPBPB21E7.02c     | SPBPB21E7.04c     |
| 2005 | L  | Yes |      |      |      |      |  | 66875.5  | *        | + | SPBPB21E7.05      | SPBPB21E7.06      |
| 2006 | L  |     |      |      |      |      |  | 69875.5  | *        | + | SPBPB21E7.06      | aes1/SPBPB21E7.07 |
| 2007 | L  | Yes |      |      |      |      |  | 74375.5  | 74375.5  | + | SPBPB21E7.08      | SPBPB21E7.09      |
| 2008 | L  |     |      |      |      |      |  | 78125.5  | *        | + | SPBPB21E7.09      | SPBPB21E7.10      |
| 2009 | E  |     |      |      | 2001 | 2001 |  | 81875.5  | 81375.5  | + | SPBPB21E7.10      | SPBPB10D8.01      |
| 2010 | L  |     | 2001 |      |      |      |  | 86875.5  | *        | + | SPBPB10D8.02c     | SPBPB10D8.03      |
| 2011 | E' |     | 2002 | 2001 |      |      |  | 90875.5  | 91375.5  | + | SPBPB10D8.03      | SPBPB10D8.04c     |
| 2012 | L  |     | 2006 |      | 2002 |      |  | 104625.5 | *        | + | SPBPB10D8.07c     | SPBC359.01        |
| 2013 | E  |     | 2007 |      |      |      |  | 112125.5 | 111875.5 | + | alr2/SPBC359.02   | SPBC359.03c       |
| 2014 | L  |     | 2008 | 2002 |      |      |  | *        | 117625.5 | + | SPBC359.03c       | SPBC359.04c       |
| 2015 | L  |     | 2010 |      |      |      |  | 132375.5 | 132625.5 | + | SPBC359.06        | SPBC1683.01       |
| 2016 | E  |     | 2011 | 2003 |      |      |  | 142375.5 | 142125.5 | + | SPBC1683.03c      | SPBC1683.04       |
| 2017 | E  |     | 2012 | 2004 | 2002 | 2003 |  | 152125.5 | 152125.5 | + | SPBC1683.05       | SPBC1683.06c      |
| 2018 | L  | Yes | 2013 |      | 2003 | 2004 |  | 201875.5 | 202125.5 | + | fbp1/SPBC660.04c  | SPBC660.05        |
| 2019 | L  | Yes | 2014 |      |      |      |  | 204375.5 | *        | + | SPBC660.05        | SPBC660.06        |
| 2020 | L  |     |      |      |      |      |  | 228875.5 | 228875.5 | + | SPBC660.15        | SPBC660.16        |
| 2021 | E  |     | 2015 | 2005 | 2004 | 2005 |  | 259125.5 | 259125.5 | + | clr3/SPBC800.03   | rpl4301/rpl37a-1  |
| 2022 | E  |     | 2016 | 2006 |      |      |  | 278625.5 | 278625.5 | + | SPBC800.11        | SPBC800.12c       |
| 2023 | E  |     |      |      | 2006 |      |  | 282375.5 | 282375.5 | + | SPBC800.13        | SPBC1773.01       |
| 2024 | E  |     |      |      |      |      |  | 324125.5 | *        | + | SPBC1773.17c      | car1/SPBP26C9.02c |
| 2025 | E  |     | 2018 | 2009 |      |      |  | 326625.5 | 326625.5 | + | car1/SPBP26C9.02c | SPBP26C9.03c      |
| 2026 | E  |     | 2019 | 2009 |      |      |  | 333375.5 | 333375.5 | + | SPBP26C9.03c      | SPBC1271.15c      |
| 2027 | E  |     |      |      |      | 2008 |  | 354875.5 | 357375.5 | + | SPBC1271.09       | SPBC1271.08c      |
| 2028 | L  | Yes | 2023 | 2013 |      |      |  | 454625.5 | 454625.5 | - | SPBC428.06c       | meu6/SPBC428.07   |
| 2029 | L  |     |      |      | 2008 | 2011 |  | 485375.5 | 484875.5 | + | alp6/SPBC902.01c  | ctf18/SPBC902.02c |
| 2030 | E  |     |      | 2014 | 2009 | 2012 |  | *        | 518625.5 | + | rps27/SPBC1685.10 | rlp1/SPBC1685.11  |
| 2031 | E  |     |      |      |      |      |  | 521125.5 | *        | + |                   |                   |
| 2032 | E  |     | 2024 | 2015 |      |      |  | 523625.5 | 523125.5 | + | rlp1/SPBC1685.11  | SPBC1685.12c      |
| 2033 | E  |     |      |      | 2010 |      |  | 529375.5 | 529625.5 | + | SPBC1685.13       | SPBC1685.14c      |

|      |   |     |           |      |      |      |        |           |           |   |                   |                     |
|------|---|-----|-----------|------|------|------|--------|-----------|-----------|---|-------------------|---------------------|
| 2034 | E |     | 2025      | 2016 |      |      |        | 571125.5  | 570625.5  | + | SPBC354.09c       | SPBC354.10          |
| 2035 | E |     |           | 2017 |      |      |        | 593375.5  | 592875.5  | + | tea4/wsh3         | wtf2/SPBC1706.02c   |
| 2036 | E |     | 2026      | 2018 | 2012 | 2014 | AT2026 | 604125.5  | 604125.5  | + | rpl803/rpk04      | rps1701/SPBC839.05c |
| 2037 | E |     |           |      | 2013 | 2016 |        | 670125.5  | 670375.5  | + | SPBC947.05c       | SPBC947.04          |
| 2038 | E |     | 2028      | 2021 |      |      |        | 674875.5  | 675125.5  | + | SPBC947.04        | SPBC947.03c         |
| 2039 | E |     |           | 2023 |      | 2017 |        | 717875.5  | 717625.5  | + | ubc4/SPBC119.02   | SPBC119.03          |
| 2040 | E |     |           |      |      | 2017 |        | 721875.5  | *         | - | mei3/SPBC119.04   | csh3/SPBC119.05c    |
| 2041 | E |     |           |      |      |      |        | 724125.5  | 723875.5  | + | csh3/SPBC119.05c  | sco1/SPBC119.06     |
| 2042 | E |     | 2029      | 2024 | 2014 | 2018 |        | 746375.5  | 746125.5  | + | SPBC119.18        | rit1/SPBC119.14     |
| 2043 | E |     |           |      |      |      |        | 833875.5  | 833875.5  | + | SPBC530.15c       | SPBC36.01c          |
| 2044 | E |     |           |      |      |      |        | 838625.5  | *         | + | SPBC36.01c        | SPBC36.02c          |
| 2045 | E |     |           |      |      |      |        | *         | 841375.5  | + |                   |                     |
| 2046 | E |     | 2031      | 2027 | 2017 | 2021 |        | 844625.5  | 843875.5  | + | SPBC36.02c        | SPBC36.03c          |
| 2047 | E |     | 2032      | 2027 | 2017 | 2021 |        | 848125.5  | 848125.5  | + | SPBC36.03c        | cys11/SPBC36.04     |
| 2048 | L | Yes | 2033      |      |      |      |        | 890875.5  | 892875.5  | + | pmp1/SPBC713.11c  | erg1/SPBC713.12     |
| 2049 | L | Yes | 2035      |      |      |      |        | 949625.5  | 949625.5  | + | gap1/SPBC646.12c  | sds23/SPBC646.13    |
| 2050 | L | Yes | 2036      | 2030 |      | 2023 |        | 958125.5  | 958125.5  | + | SPBC646.15c       | SPBC646.16          |
| 2051 | L | Yes |           |      |      |      |        | 962875.5  | 962875.5  | + | dic1/SPBC855.01c  | SPBP35G2.02         |
| 2052 | E |     |           | 2033 |      | 2025 |        | 1055875.5 | 1055875.5 | - | gtr1/SPBC337.13c  | rpb4/SPBC337.14     |
| 2053 | L | Yes |           |      |      | 2026 |        | 1079125.5 | 1080875.5 | + | SPBC1734.10c      | SPBC1734.11         |
| 2054 | E |     | 2038      | 2034 | 2019 | 2027 |        | 1106375.5 | 1106625.5 | + | cyp3/SPBC1709.04c | sks2/SPBC1709.05    |
| 2055 | E |     | 2039      | 2035 | 2020 | 2028 |        | 1142645.5 | 1142625.5 | + | skp1/SPBC409.05   | uch2/SPBC409.06     |
| 2056 | E |     |           |      |      |      |        | 1148625.5 | 1148875.5 | + | wis1/SPBC409.07c  | SPBC409.08          |
| 2057 | E |     |           | 2038 | 2023 | 2029 |        | 1244875.5 | 1245125.5 | + | gyp10/SPBC651.03c | SPBC651.04          |
| 2058 | E |     | 2041      | 2039 |      |      | AT2041 | 1255875.5 | 1255625.5 | + | rpc1/SPBC651.08c  | SPBC651.09c         |
| 2059 | E |     | 2042/2043 | 2040 |      |      |        | 1267375.5 | 1266125.5 | + | cwl1/SPBC31A8.01c | SPBC31A8.02         |
| 2060 | E |     |           | 2041 |      |      |        | 1269625.5 | *         | + | SPBC31A8.02       | but2/SPBC3D6.02     |
| 2061 | E |     | 2044      | 2042 | 2024 | 2030 | ORI c7 | 1278375.5 | 1278875.5 | + | mad1/SPBC3D6.04c  | ptp4/SPBC3D6.05     |
| 2062 | E |     | 2046      | 2044 | 2025 | 2031 |        | 1313625.5 | 1313625.5 | + | sol1/SPBC30B4.04c | kap109/SPBC30B4.05  |
| 2063 | E |     |           |      |      |      |        | 1352125.5 | 1351125.5 | + | SPBC27B12.14      | SPBC27B12.12c       |
| 2064 | L |     |           |      |      |      |        | 1366875.5 | *         | - | hht2/SPBC8D2.04   | stf1/SPBC8D2.05c    |

|      |   |     |           |      |      |      |                |           |           |   |                     |                          |
|------|---|-----|-----------|------|------|------|----------------|-----------|-----------|---|---------------------|--------------------------|
| 2065 | E |     |           | 2045 | 2026 | 2032 |                | 1389875.5 | 1390125.5 | + | SPBC8D2.16c         | SPBC8D2.17               |
| 2066 | E |     | 2047      | 2047 |      |      |                | 1444625.5 | 1444375.5 | + | SPBP22H7.05c        | SPBP22H7.06              |
| 2067 | E |     | 2048      | 2048 | 2028 | 2034 |                | 1457625.5 | 1457625.5 | + | nep2/SPBC32H8.02c   | bem46/SPBC32H8.03        |
| 2068 | L |     |           |      |      |      |                | 1462375.5 | 1462375.5 | + | SPBC32H8.05         | SPBC32H8.06              |
| 2069 | L | Yes |           |      |      | 2035 |                | 1500875.5 | 1501125.5 | + | SPBC11B10.08        | cdc2/SPBC11B10.09        |
| 2070 | E |     | 2049      | 2050 | 2029 | 2036 | ars2004        | 1546625.5 | 1546375.5 | + | SPBC83.18c          | atf1/SPBC29B5.01         |
| 2071 | E |     |           |      | 2030 |      | ars2003        | 1557125.5 | 1556875.5 | + | isp4/SPBC29B5.02c   | rpl26/SPBC29B5.03c       |
| 2072 | E |     | 2051      | 2051 | 2031 |      | ars2002        | 1589875.5 | 1590125.5 | + | kap1/SPBC28F2.10c   | SPBC28F2.11              |
| 2073 | E |     |           | 2053 |      |      |                | 1656875.5 | 1656875.5 | + | SPBC21B10.09        | SPBC21B10.08c            |
| 2074 | E |     |           | 2054 |      |      |                | 1667625.5 | 1668375.5 | + | nrf1/SPBC21B10.04c  | SPBC21B10.03c            |
| 2075 | E |     |           |      |      |      |                | 1683375.5 | 1683125.5 | + | ubp11/SPBC1902.04c  | ran1/SPBC19C2.05         |
| 2076 | E |     |           | 2055 | 2033 | 2038 |                | 1707875.5 | 1708375.5 | + | SPBC2F12.15c        | gua1/SPBC2F12.14c        |
| 2077 | E |     |           | 2056 | 2033 | 2038 |                | 1718875.5 | 1718375.5 | + | SPBC2F12.12c        | rep2/SPBC2F12.11c        |
| 2078 | E |     |           | 2034 | 2039 |      |                | 1752125.5 | 1750625.5 | + | SPBC1D7.03          | scr1/SPBC1D7.02c         |
| 2079 | E |     |           | 2058 | 2035 | 2040 |                | 1780375.5 | 1780125.5 | + | sce3/SPBC18H10.04c  | SPBC18H10.05             |
| 2080 | E |     |           | 2059 | 2036 | 2041 |                | 1807625.5 | 1806875.5 | + | SPBC18H10.18c       | SPBC18H10.19             |
| 2081 | L | Yes | 2062      | 2060 |      | 2042 |                | 1869875.5 | 1869875.5 | + | mug142/SPBC3H7.09   | SPBC3H7.08c              |
| 2082 | E |     |           |      | 2037 |      |                | 1894625.5 | 1894625.5 | - | spo14/SPBP16F5.01c  | mcs2/SPBP16F5.02         |
| 2083 | E |     |           | 2061 |      | 2044 |                | 1943375.5 | 1943875.5 | + | pab2/SPBC16E9.12c   | ksp1/SPBC16E9.13         |
| 2084 | E |     |           | 2062 | 2039 |      |                | 1954625.5 | 1955125.5 | + | SPBC16E9.16c        | rem1/SPBC16E9.17c        |
| 2085 | E |     |           | 2063 | 2039 |      |                | 1965625.5 | 1965875.5 | + | SPBC1E8.03c         | Tf2-10-pseudo/SPBC1E8.04 |
| 2086 | E |     | 2063      | 2064 | 2040 | 2046 |                | 2025625.5 | 2024875.5 | + | SPBP23A10.11c       | SPBP23A10.12             |
| 2087 | E |     | 2065      | 2066 | 2041 | 2047 |                | 2053625.5 | 2053875.5 | - | SPBC29A3.07c        | po4/SPBC29A3.08          |
| 2088 | L |     | 2066      | 2067 |      | 2048 |                | 2071875.5 | 2071625.5 | - | SPBC29A3.16         | gef3/SPBC29A3.17         |
| 2089 | L | Yes | 2067      |      |      |      |                | 2106375.5 | 2106625.5 | - | nif1/SPBC23G7.04c   | sui1/SPBC23G7.05         |
| 2090 | L | Yes |           |      |      |      |                | 2112625.5 | 2112375.5 | + | SPBC23G7.07c        | rga7/SPBC23G7.08c        |
| 2091 | E | Yes | 2068      | 2068 | 2042 | 2049 | pARS756/ORI 75 | 2119625.5 | 2119375.5 | + | matmc_2/SPBC23G7.09 | SPBC23G7.10c             |
| 2092 | E |     | 2069/2070 | 2069 |      | 2050 |                | *         | 2131125.5 | + | rpp202/SPBC23G7.15c | matmi_1/SPBC1711.01c     |
| 2093 | E |     |           |      |      |      |                | 2134125.5 | 2134375.5 | + |                     |                          |
| 2094 | E |     | 2071      | 2070 |      |      |                | 2139625.5 | 2139125.5 | + | matmc_1/SPBC1711.02 | SPBC1711.03              |
| 2095 | E |     |           | 2072 |      |      |                | 2178875.5 | 2178875.5 | + | nup85/SPBC17G9.04c  | cyp6/SPBC17G9.05         |

|      |   |     |      |      |      |      |         |           |           |   |                    |                      |
|------|---|-----|------|------|------|------|---------|-----------|-----------|---|--------------------|----------------------|
| 2096 | E |     | 2072 | 2073 | 2044 | 2051 | AT2072  | 2188625.5 | 2187625.5 | + | csx2/SPBC17G9.08c  | tif213/SPBC17G9.09   |
| 2097 | E |     | 2073 | 2075 | 2045 | 2054 |         | 2247875.5 | 2247875.5 | + | SPBC15C4.04c       | SPBC15C4.05          |
| 2098 | L | Yes |      |      | 2046 | 2055 |         | 2267125.5 | 2267625.5 | + | SPBC21H7.06c       | his5/SPBC21H7.07c    |
| 2099 | E |     | 2074 | 2076 | 2047 | 2056 |         | 2320625.5 | 2320875.5 | + | trx2/SPBC12D12.07c | ned8/SPBC24C6.01c    |
| 2100 | L | Yes |      |      |      | 2057 |         | 2340125.5 | 2341125.5 | + | SPBC24C6.09c       | SPBC24C6.10c         |
| 2101 | L | Yes | 2075 |      |      |      |         | 2412875.5 | 2412375.5 | + | mex67/SPBC1921.03c | SPBC1921.04c         |
| 2102 | E |     | 2076 | 2080 | 2049 | 2059 |         | 2445375.5 | 2445125.5 | + | ucp3/SPBC21D10.05c | fnx1/SPBC12C2.13c    |
| 2103 | E |     |      | 2081 |      |      |         | 2525375.5 | 2525375.5 | + | SPBC365.14c        | alp4/SPBC365.15      |
| 2104 | E |     |      |      |      |      |         | 2532875.5 | 2532875.5 | + | alp4/SPBC365.15    | SPBC365.16           |
| 2105 | E |     | 2078 | 2082 |      |      |         | 2554875.5 | 2554875.5 | + | SPBC29A10.07       | SPBC29A10.08         |
| 2106 | L | Yes | 2080 |      | 2052 | 2063 | AT2080  | 2582875.5 | 2583125.5 | + | SPBC2G5.02c        | SPBC2G5.03           |
| 2107 | E |     | 2081 | 2083 |      |      |         | 2595625.5 | 2595625.5 | + | rpc25/SPBC2G5.07c  | SPBC25B2.01          |
| 2108 | L |     |      |      |      |      |         | 2614625.5 | *         | + | SPBC25B2.08        | SPBC25B2.09c         |
| 2109 | L | Yes |      |      |      |      |         | 2649875.5 | 2650125.5 | + | SPBC6B1.08c        | SPBC6B1.12c          |
| 2110 | E |     | 2084 | 2087 |      | 2066 |         | 2704875.5 | 2703625.5 | + | mrpl39/SPBC4F6.08c | str1/SPBC4F6.09      |
| 2111 | E |     | 2085 | 2088 |      |      |         | 2740625.5 | 2740375.5 | + | SPBC336.02         | efc25/SPBC336.03     |
| 2112 | E |     | 2086 | 2091 | 2055 | 2068 | tug1    | 2793125.5 | 2792375.5 | + | gpx1/SPBC32F12.03c | tug1/SPBC32F12.04    |
| 2113 | E |     | 2087 | 2092 |      |      | rum1    | 2801375.5 | 2801375.5 | + | duo1/SPBC32F12.08c | rum1/SPBC32F12.09    |
| 2114 | L | Yes | 2088 |      |      | 2069 | pARS745 | 2829875.5 | 2830125.5 | + | SPBC19C7.04c       | SPBC19C7.05          |
| 2115 | E | Yes | 2089 | 2093 |      | 2070 | pARS772 | 2903125.5 | 2902375.5 | + | SPBP4H10.14c       | SPBP4H10.15          |
| 2116 | L | Yes |      |      |      |      |         | 2911875.5 | *         | - | SPBP4H10.18c       | SPBP4H10.19c         |
| 2117 | E |     | 2091 | 2094 | 2057 | 2071 |         | 2941125.5 | 2940875.5 | + | ubp9/SPBC1703.12   | SPBC1703.13c         |
| 2118 | E |     | 2092 | 2095 | 2058 | 2072 |         | 2988875.5 | 2988625.5 | + | SPBC2D10.11c       | rhp23/SPBC2D10.12    |
| 2119 | L |     | 2094 | 2096 | 2073 | 2073 |         | 3054125.5 | 3053875.5 | + | SPBC13E7.06        | SPBC13E7.07          |
| 2120 | L | Yes | 2095 | 2098 | 2060 | 2075 |         | 3099875.5 | 3099375.5 | + | zuo1/SPBC30D10.01  | rap1/SPBC1778.02     |
| 2121 | L | Yes |      |      |      |      |         | 3163375.5 | 3163875.5 | + | SPBC609.01         | ptn1/SPBC609.02      |
| 2122 | E |     | 2097 | 2100 |      | 2078 |         | 3177875.5 | 3177875.5 | + | dis2/SPBC776.02c   | SPBC776.03           |
| 2123 | E |     | 2100 | 2102 |      | 2080 |         | 3288875.5 | 3289125.5 | + | SPBC20F10.02c      | SPBC20F10.03         |
| 2124 | E |     |      | 2103 |      | 2082 |         | 3339125.5 | 3339625.5 | + | SPBC17D1.05        | dbp3/SPBC17D1.06     |
| 2125 | E |     | 2102 | 2104 |      | 2083 |         | 3363375.5 | 3363125.5 | + | SPBC11C11.12       | rpl1807/SPBC11C11.07 |
| 2126 | L | Yes | 2103 |      |      |      | pARS727 | 3381125.5 | 3381125.5 | + | SPBC3B8.08         | dsd1/SPBC3B8.07c     |

|      |   |      |      |      |      |      |  |           |           |   |                     |                    |
|------|---|------|------|------|------|------|--|-----------|-----------|---|---------------------|--------------------|
| 2127 | L |      | 2104 |      |      |      |  | 3410125.5 | 3410125.5 | + | ptr2/SPBC13A2.04c   | SPBC4B4.01c        |
| 2128 | E |      | 2105 | 2106 | 2063 | 2084 |  | 3423875.5 | 3424125.5 | + | smg1/SPBC4B4.05     | vps25/SPBC4B4.06   |
| 2129 | E |      |      | 2107 | 2064 | 2085 |  | 3468375.5 | 3468375.5 | + | SPBC2G2.16          | SPBC2G2.17c        |
| 2130 | E |      |      |      |      |      |  | 3489875.5 | 3489625.5 | + |                     |                    |
| 2131 | E |      | 2107 | 2108 |      |      |  | 3493125.5 | 3493125.5 | + | zfs1/SPBC1718.07c   | SPBPB7E8.01        |
| 2132 | L |      |      |      |      |      |  | 3503875.5 | 3504125.5 | - | SPBPB7E8.02         | SPBC1105.01        |
| 2133 | E |      |      |      | 2065 | 2086 |  | 3512875.5 | 3511875.5 | + | mrpl16/SPBC1105.03c | cbp1/SPBC1105.04c  |
| 2134 | E |      |      | 2109 |      |      |  | 3515125.5 | 3515125.5 | + | cbp1/SPBC1105.04c   | exg1/SPBC1105.05   |
| 2135 | E | Yes' | 2108 | 2110 | 2066 | 2087 |  | 3558375.5 | 3558375.5 | + | SPBC887.09c         | mcs4/SPBC887.10    |
| 2136 | E |      |      |      | 2067 | 2088 |  | 3599125.5 | 3599125.5 | + | dna2/SPBC16D10.04c  | mok13/SPBC16D10.05 |
| 2137 | E |      | 2110 | 2111 |      |      |  | 3607125.5 | 3607375.5 | + | mok13/SPBC16D10.05  | SPBC16D10.06       |
| 2138 | E |      | 2111 | 2112 | 2068 | 2089 |  | 3636875.5 | 3636875.5 | + | SPBPB87.01c         | SPBPB87.02         |
| 2139 | L | Yes  |      |      |      |      |  | 3703125.5 | 3705125.5 | + | puc1/SPBC19F5.01c   | SPBC19F5.02c       |
| 2140 | E | Yes  | 2114 | 2115 |      | 2092 |  | 3722875.5 | 3722375.5 | + | mcm7/SPBC25D12.03c  | suc22/SPBC25D12.04 |
| 2141 | E |      | 2115 | 2117 | 2069 | 2093 |  | 3765125.5 | 3764375.5 | + | sar1/SPBC31F10.06c  | SPBC31F10.07       |
| 2142 | L |      |      |      |      |      |  | 3779375.5 | 3779375.5 | + | hip1/SPBC31F10.13c  | hip3/SPBC31F10.14c |
| 2143 | L |      |      | 2118 | 2070 | 2094 |  | 3804125.5 | 3804125.5 | - | SPBC21C3.02c        | SPBC21C3.03        |
| 2144 | E |      |      | 2119 |      |      |  | 3816875.5 | 3817125.5 | + | SPBC21C3.10c        | SPBC21C3.11        |
| 2145 | E |      | 2116 | 2121 | 2071 | 2095 |  | 3840875.5 | 3840875.5 | + | SPBC23E6.01c        | SPBC23E6.02        |
| 2146 | E |      | 2119 | 2123 | 2072 | 2098 |  | 3917875.5 | 3918125.5 | + | SPBC1604.09c        | imp1/SPBC1604.08c  |
| 2147 | E |      |      |      |      |      |  | 3928125.5 | 3928625.5 | + | SPBC1604.04         | SPBC1604.03c       |
| 2148 | E |      | 2120 | 2124 | 2073 | 2099 |  | 3940125.5 | 3940875.5 | + | SPBC1677.03c        | thi2/SPBC26H8.01   |
| 2149 | L | Yes  |      |      |      |      |  | 3976125.5 | 3977375.5 | + | dis3/SPBC26H8.10    | SPBC26H8.11c       |
| 2150 | L | Yes  |      |      |      |      |  | 3985875.5 | 3986875.5 | + | SPBC26H8.12         | ste11/SPBC32C12.02 |
| 2151 | E |      | 2123 | 2125 | 2076 | 2101 |  | 4021125.5 | 4021375.5 | - | nup120/SPBC3B9.16c  | isa2/SPBC3B9.17    |
| 2152 | L |      |      |      |      |      |  | 4033375.5 | 4032125.5 | + |                     |                    |
| 2153 | L |      |      | 2126 |      |      |  | 4035625.5 | 4035125.5 | + | git11/SPBC215.04    | gpd1/SPBC215.05    |
| 2154 | L | Yes  | 2125 |      | 2078 | 2104 |  | 4109375.5 | 4109375.5 | + | SPBC56F2.06         | SPBC56F2.05c       |
| 2155 | L |      |      |      | 2079 |      |  | 4131125.5 | 4131125.5 | + | crp3/SPBC1861.01c   | abp2/SPBC1861.02   |
| 2156 | L |      | 2128 | 2129 | 2081 | 2107 |  | 4204875.5 | 4204875.5 | + | alg6/SPBC342.01c    | SPBC342.02         |
| 2157 | E |      |      | 2130 |      |      |  | 4228125.5 | 4228125.5 | + | SPBC16G5.07c        | trp4/SPBC16G5.08   |

|      |   |                  |      |      |      |      |  |           |           |   |                    |                   |
|------|---|------------------|------|------|------|------|--|-----------|-----------|---|--------------------|-------------------|
| 2158 | E | Yes <sup>f</sup> |      | 2131 | 2082 | 2108 |  | 4238625.5 | 4238625.5 | + | top3/SPBC16G5.12c  | SPBC16G5.13       |
| 2159 | L | Yes              |      |      |      | 2109 |  | 4253625.5 | 4253875.5 | + | erg24/SPBC16G5.18  | SPBC16G5.19       |
| 2160 | L | Yes              | 2129 | 2132 |      | 2110 |  | 4294125.5 | 4294625.5 | + | rsm25/SPBC16A3.04  | lyn1/SPBC16A3.03c |
| 2161 | L | Yes              |      |      |      |      |  | 4345875.5 | 4346125.5 | + | rpt1/SPBC16C6.07c  | qcr6/SPBC16C6.08c |
| 2162 | E |                  | 2130 | 2133 | 2083 | 2111 |  | 4361875.5 | 4362125.5 | - | SPBC244.02c        | sid4/SPBC244.01c  |
| 2163 | L | Yes              |      |      |      | 2113 |  | 4413125.5 | 4414125.5 | + | SPBC1289.13c       | SPBC1289.14       |
| 2164 | L |                  | 2131 | 2135 | 2084 | 2114 |  | 4421875.5 | 4421875.5 | + | Tf2-11/SPBC1289.17 | SPBC1289.15       |
| 2165 | L |                  |      |      |      |      |  | 4427875.5 | 4427875.5 | + | SPBC1289.15        | SPBC1289.16c      |
| 2166 | E |                  | 2132 | 2136 |      |      |  | 4442375.5 | 4442125.5 | + | SPBC8E4.03         | SPBC8E4.02c       |
| 2167 | L |                  | 2133 | 2137 |      | 2115 |  | 4453125.5 | 4453375.5 | + | pho1/SPBP4G3.02    | SPBP4G3.03        |
| 2168 | L |                  |      |      |      | 2115 |  | 4456125.5 | *         | + |                    |                   |
| 2169 | L |                  |      |      |      |      |  | 4458875.5 | *         | - | SPBP4G3.03         | SPBP4G3.03        |

Chromosome III

| Ori Number | Class | Cds1 Suppression | Bioinfo Number (Segurado <i>et al.</i> ) | ORIs Number (Heichinger <i>et al.</i> ) | ORF Microarray Number (Feng <i>et al.</i> ) |                    | ARS/2D-gel Number (Segurado <i>et al.</i> ) | Map Position (bp) |          | Orc4 localization | 5' Gene/ORF        | 3' Gene/ORF        |
|------------|-------|------------------|------------------------------------------|-----------------------------------------|---------------------------------------------|--------------------|---------------------------------------------|-------------------|----------|-------------------|--------------------|--------------------|
|            |       |                  |                                          |                                         | wt (HU)                                     | $\Delta$ cds1 (HU) |                                             | Orc1              | Mcm6     |                   |                    |                    |
| 3001       | E     |                  | 3002                                     | 3001                                    | 3001                                        | 3001               |                                             | 35375.5           | 35375.5  | +                 | SPCP20C8.03        | SPCC1884.01        |
| 3002       | E     |                  | 3003                                     | 3004                                    |                                             | 3003               |                                             | 76375.5           | 76625.5  | +                 | SPCC757.12         | SPCC757.13         |
| 3003       | E     |                  | 3005                                     | 3007                                    | 3003                                        | 3004               | ars3002/3004                                | 123875.5          | 122875.5 | +                 | SPCC330.07c        | alg11/SPCC330.08   |
| 3004       | E     |                  | 3008                                     |                                         |                                             |                    |                                             | 188125.5          | 189125.5 | +                 | fft2/SPCC1235.05c  | sif1/SPCC1235.06   |
| 3005       | E     |                  | 3006                                     | 3009                                    | 3004                                        | 3006               |                                             | 206875.5          | 207875.5 | +                 | ght6/SPCC1235.13   | ght5/SPCC1235.14   |
| 3006       | E     |                  | 3007                                     | 3010                                    |                                             |                    |                                             | 232125.5          | 231875.5 | +                 | SPCC548.06c        | ght1/SPCC548.07c   |
| 3007       | E     |                  | 3009                                     | 3012                                    |                                             | 3007               |                                             | 254125.5          | 253875.5 | +                 | SPCC794.04c        | SPCC794.6          |
| 3008       | E     |                  | 3013                                     |                                         |                                             |                    |                                             | 279375.5          | 278125.5 | -                 | mae2/SPCC794.12c   | SPCC794.15         |
| 3009       | E     |                  | 3010                                     | 3014                                    |                                             | 3008               |                                             | 286375.5          | 286625.5 | +                 | SPCC553.10         | spb70/pol12        |
| 3010       | E     |                  |                                          | 3015                                    | 3006                                        |                    |                                             | 305875.5          | 305875.5 | -                 | SPCC553.03         | SPCC553.02         |
| 3011       | E     |                  |                                          |                                         |                                             |                    |                                             | 347625.5          | 347625.5 | +                 | dis1/SPCC736.14    | SPCC736.15         |
| 3012       | E     |                  | 3012                                     | 3017                                    | 3008                                        | 3010               |                                             | 370125.5          | 370375.5 | +                 | SPCC594.07c        | qcr9/SPCC1682.01   |
| 3013       | E     |                  | 3013                                     | 3018                                    | 3009                                        | 3011               |                                             | 398125.5          | 398125.5 | +                 | ubp16/SPCC1682.12c | SPCC1682.13        |
| 3014       | E     |                  | 3015                                     | 3020                                    |                                             |                    |                                             | 505625.5          | 505625.5 | +                 | SPCC970.06         | rpl3601/SPCC970.05 |
| 3015       | E     |                  | 3016                                     | 3021                                    | 3011                                        | 3013               |                                             | 518625.5          | 518875.5 | +                 | rad16/SPCC970.01   | prp11/SPCC10H11.01 |

|      |   |     |      |      |      |      |        |           |           |   |                     |                   |
|------|---|-----|------|------|------|------|--------|-----------|-----------|---|---------------------|-------------------|
| 3016 | E |     | 3017 | 3024 |      |      |        | 565625.5  | 565625.5  | + | sap1/SPCC1672.02c   | SPCC1672.03c      |
| 3017 | E |     | 3018 | 3025 | 3012 | 3014 |        | 575125.5  | 575125.5  | + | asp1/SPCC1672.06c   | SPCC1672.07       |
| 3018 | E |     |      | 3026 |      |      |        | 605625.5  | 605375.5  | - | ung1/SPCC1183.06    | SPCC1183.07       |
| 3019 | E |     | 3019 | 3028 | 3014 | 3015 |        | 643125.5  | 643125.5  | + | taf72/SPCC5E4.03c   | cut1/SPCC5E4.04   |
| 3020 | E |     | 3020 | 3029 |      | 3016 |        | 666125.5  | 666125.5  | + | pin1/SPCC16C4.03    | SPCC16C4.04       |
| 3021 | E |     | 3021 | 3030 | 3015 | 3017 |        | 720125.5  | 720125.5  | + | SPCC18B5.02c        | wee1/SPCC18B5.03  |
| 3022 | E |     | 3022 | 3031 | 3016 | 3018 |        | 764125.5  | 764125.5  | + | oca2/SPCC1020.10    | SPCC1020.09       |
| 3023 | E |     | 3023 |      |      |      |        | 826875.5  | 827875.5  | + | SPCC1393.13         | SPCC2H8.02        |
| 3024 | E |     |      |      | 3018 | 3020 |        | 847875.5  | 847875.5  | - | SPCC63.06           | SPCC63.07         |
| 3025 | E |     | 3024 | 3033 |      |      |        | 853625.5  | 853625.5  | + | ppk36/SPCC63.08c    | SPCC63.10c        |
| 3026 | E |     | 3025 | 3035 | 3019 | 3022 |        | 936375.5  | 936875.5  | + | SPCC24B10.19c       | SPCC24B10.20      |
| 3027 | E |     |      |      |      |      |        | 966375.5  | 967875.5  | + |                     |                   |
| 3028 | E |     | 3026 | 3036 | 3020 | 3023 |        | 971125.5  | 971375.5  | + | SPCC1795.13         | SPCC1795.12c      |
| 3029 | E |     |      | 3037 |      |      |        | 986125.5  | 985875.5  | + | SPCC1795.07         | map2/SPCC1795.06  |
| 3030 | L | Yes | 3027 | 3038 |      | 3025 |        | 1039625.5 | 1039625.5 | + | SPCC1259.02c        | rpa12/SPCC1259.03 |
| 3031 | E |     |      | 3041 |      |      |        | 1066125.5 | 1065875.5 | + | meu27/SPCC1259.14c  | centromere        |
| 3032 | E |     |      | 3042 | 3021 | 3026 |        | 1141875.5 | 1142125.5 | + | centromere          | SPCC4B3.18        |
| 3033 | E |     | 3039 | 3044 | 3024 | 3028 |        | 1254125.5 | 1254125.5 | + | snd1/SPCC645.08c    | mrp137/SPCC645.09 |
| 3034 | E |     | 3040 | 3045 | 3025 | 3030 |        | 1324125.5 | 1323875.5 | + | rpl3402/SPCC1322.15 | SPCC1322.16       |
| 3035 | E |     |      | 3046 | 3026 | 3031 |        | 1343375.5 | 1343375.5 | + | SPCC338.18          | rad21/SPCC338.17c |
| 3036 | E |     |      |      |      |      |        | 1371875.5 | 1371125.5 | + |                     |                   |
| 3037 | E |     | 3042 | 3047 | 3027 | 3032 |        | *         | 1373875.5 | + | SPCC338.02          | ags1/SPCC1281.01  |
| 3038 | E |     |      |      | 3028 | 3033 |        | 1393625.5 | *         | - | rsc7/SPCC1281.05    | SPCC1281.06c      |
| 3039 | E |     |      | 3048 |      |      |        | 1396875.5 | 1396875.5 | + | SPCC1281.06c        | SPCC1281.07c      |
| 3040 | E |     | 3043 | 3049 |      |      | AT3043 | 1411125.5 | 1411375.5 | + | SPCC622.07          | hta1/SPCC622.08c  |
| 3041 | E |     | 3044 | 3050 |      | 3034 | AT3044 | 1417875.5 | 1417875.5 | + | SPCC622.10c         | SPCC622.11        |
| 3042 | E |     | 3045 | 3051 | 3029 | 3035 |        | 1449125.5 | 1449125.5 | + | SPCC61.04c          | SPCC61.05         |
| 3043 | E |     | 3046 | 3052 | 3031 | 3036 |        | 1511875.5 | 1511875.5 | + | dcr1/SPCC584.10c    | SPCC584.11c       |
| 3044 | E |     |      |      |      | 3037 |        | 1524875.5 | 1524875.5 | + | SPCC584.15c         | SPCC584.16c       |
| 3045 | E |     | 3047 | 3053 |      | 3037 |        | 1532625.5 | 1532125.5 | + | SPCC584.01c         | cut2/SPCC584.02   |
| 3046 | E |     |      | 3054 |      | 3038 |        | 1556375.5 | 1556375.5 | + | SPCC162.12          | SPCC162.11c       |

|      |   |  |      |      |      |      |         |           |           |   |                    |                    |
|------|---|--|------|------|------|------|---------|-----------|-----------|---|--------------------|--------------------|
| 3047 | E |  |      | 3055 |      | 3039 |         | 1576875.5 | 1576625.5 | + | ent1/SPCC162.07    | SPCC162.06c        |
| 3048 | E |  | 3048 | 3056 |      |      |         | 1595375.5 | 1595125.5 | + | SPCC13B11.02c      | SPCC13B11.03c      |
| 3049 | E |  | 3049 | 3057 | 3032 | 3040 |         | 1609875.5 | 1609875.5 | + | SPCC777.07c        | SPCC777.07         |
| 3050 | E |  |      |      |      |      |         | 1672875.5 | 1672875.5 | + | dad5/SPCC417.02    | SPCC417.03         |
| 3051 | E |  |      |      |      |      |         | 1675875.5 | 1675625.5 | + | SPCC417.04         | chr2/SPCC417.05c   |
| 3052 | E |  |      |      |      |      |         | 1680625.5 | 1680625.5 | + | ppk35/SPCC417.06c  | mta1/SPCC417.07c   |
| 3053 | E |  | 3051 | 3059 | 3035 | 3041 |         | 1687125.5 | 1685125.5 | + | mta1/SPCC417.07c   | tef3/SPCC417.08    |
| 3054 | E |  | 3052 | 3060 | 3035 | 3041 |         | 1690125.5 | 1690625.5 | + | tef3/SPCC417.08    | SPCC417.09c        |
| 3055 | E |  | 3053 | 3061 | 3036 | 3042 | AT3053  | 1720125.5 | *         | + | SPCC191.08         | gst1/SPCC191.09c   |
| 3056 | E |  |      |      | 3036 | 3042 |         | *         | 1723375.5 | + | SPCC191.10         | inv1/SPCC191.11    |
| 3057 | E |  | 3054 | 3062 |      |      |         | 1728625.5 | 1728875.5 | + | SPCC1450.01c       | SPCC1450.02        |
| 3058 | E |  |      | 3063 | 3037 | 3043 |         | 1754625.5 | 1754875.5 | + | cek1/SPCC1450.11c  | SPCC1450.12        |
| 3059 | E |  |      |      |      |      |         | 1815375.5 | 1814625.5 | + | cgs2/SPCC285.09c   | SPCC285.10c        |
| 3060 | E |  | 3055 | 3064 | 3038 | 3044 | ORI c11 | 1823125.5 | 1823125.5 | + | SPCC285.13c        | SPCC285.14         |
| 3061 | E |  | 3056 | 3065 |      |      | nmt1    | 1838375.5 | 1838625.5 | + | SPCC1223.01        | nmt1/SPCC1223.02   |
| 3062 | E |  | 3057 | 3065 | 3039 | 3045 | AT3057  | 1845375.5 | 1845375.5 | + | gut2/SPCC1223.03c  | SPCC1223.04c       |
| 3063 | E |  |      |      |      |      |         | 1861375.5 | 1860625.5 | + | SPCC1223.09        | SPCC1223.10c       |
| 3064 | E |  | 3058 | 3066 |      | 3046 |         | 1868125.5 | 1868375.5 | + | ptc2/SPCC1223.11   | meu10/SPCC1223.12c |
| 3065 | E |  |      |      |      |      |         | 1878625.5 | 1879125.5 | - | SPCC297.01         | ssp1/SPCC297.03    |
| 3066 | E |  |      |      | 3040 | 3047 |         | 1922625.5 | 1923625.5 | + | SPCC74.09          | sly1/SPCC74.01     |
| 3067 | E |  | 3059 | 3068 | 3040 | 3047 |         | 1930125.5 | 1929875.5 | + | SPCC74.02c         | ssp2/SPCC74.03c    |
| 3068 | E |  |      |      |      |      |         | 1937375.5 | 1936125.5 | + | ssp2/SPCC74.03c    | SPCC74.04          |
| 3069 | E |  |      | 3069 | 3041 | 3048 |         | 1969375.5 | 1969625.5 | + | SPCC18.06c         | rpc53/SPCC18.07    |
| 3070 | E |  | 3060 | 3072 | 3042 | 3049 |         | 2036375.5 | 2036375.5 | + | SPCC1739.04c       | set5/SPCC1739.05   |
| 3071 | E |  |      |      |      |      |         | *         | *         | + | set5/SPCC1739.05   | SPCC1739.06c       |
| 3072 | E |  |      |      |      |      |         | 2042625.5 | *         | + | SPCC1739.07        | SPCC1739.08c       |
| 3073 | E |  |      |      |      |      |         | 2046375.5 | 2046625.5 | + | SPCC1739.08c       | cox13/SPCC1739.09c |
| 3074 | E |  |      |      | 3043 | 3050 |         | 2064375.5 | 2064625.5 | + | npp106/SPCC1739.14 | wtf21/SPCC1739.15  |
| 3075 | E |  |      | 3073 |      |      |         | 2068625.5 | 2068625.5 | + | wtf21/SPCC1739.15  | amt1/SPCPB1C11.01  |
| 3076 | E |  |      |      |      |      |         | 2072375.5 | 2072875.5 | + | amt1/SPCPB1C11.01  | SPCPB1C11.02       |
| 3077 | L |  |      |      |      |      |         | 2076375.5 | 2076625.5 | + | SPCPB1C11.02       | SPCPB1C11.03       |

|      |   |     |      |      |      |      |         |           |           |   |                   |                   |
|------|---|-----|------|------|------|------|---------|-----------|-----------|---|-------------------|-------------------|
| 3078 | E |     | 3062 | 3074 | 3044 | 3051 | pARS744 | 2108375.5 | 2108375.5 | + | ksg1/SPCC576.15c  | wtf22/SPCC576.16c |
| 3079 | E |     | 3064 | 3077 | 3047 | 3053 |         | 2201875.5 | 2201875.5 | + | SPCC830.09c       | SPCC830.10        |
| 3080 | E |     |      |      |      |      |         | 2258375.5 | 2258625.5 | + | bgs4/SPCC1840.02c | sal3/SPCC1840.03  |
| 3081 | E |     | 3065 | 3079 | 3049 | 3054 |         | 2277125.5 | 2277125.5 | + | SPCC1840.09       | lsm8/SPCC1840.10  |
| 3082 | E |     |      | 3080 |      | 3055 |         | 2300875.5 | 2301375.5 | + | alr1/SPCC965.08c  | SPCC965.09        |
| 3083 | L | Yes | 3066 |      |      |      |         | 2309625.5 | 2309625.5 | + | SPCC965.12        | SPCC965.13        |
| 3084 | E |     | 3068 | 3083 | 3051 | 3058 |         | 2383625.5 | 2383375.5 | + | SPCC1827.03c      | SPCC1827.04       |

#### Legend and Comments

Ori number: Replication origins identified as pre-RC sites in this study; the first digit indicates the chromosome number (1-3).  
Class: Activity of origins determined by BrdU incorporation in the presence of HU (Supplementary Fig. S5); E, Early origin (red column); L, Late and/or inefficient origin (blue column).  
Cds1 suppression: Origins suppressed by Cds1-dependent checkpoint in the presence of HU, as indicated in Fig. 5 and Supplementary Fig. S8.  
Bioinfo Number: AT-rich island number (Segurado et al., 2003).  
ORIs Number: Origins defined by the increase in DNA content (Heichinger et al., 2006). Location of each ORI was compared with our origins by its peak and flanking ORF position.  
ORF Microarray Number: Origins defined by the increase in ssDNA content in the presence of HU (Feng et al., 2006). 5-kb deviation, which corresponds to fork movement in the presence of HU, from the original peak position was allowed.  
ARS/2D-gel Number: Name of ARS or origins identified by ARS analyses and 2D-gel analyses (summarized in Segurado et al., 2003).  
Map Position: The peak position of Orc1 and Mcm6 signals (Supplementary Fig. S1 and S2).  
Orc4 localization: A "+" and "-" indicates that significant signal of Orc4 was detected or not, respectively (Supplementary Fig. S3).  
5' Gene/ORF, 3' Gene/ORF: The name of the 5' gene/ORF or 3' gene/ORF flanking the region containing the pre-RC site.

#: A significant but faint signal of BrdU was detected.

\*: A peak was not programatically picked up, although significant localization of Orc1 or Mcm6 was detected.
