# Supplementary material
Source: PubMed Central journal article supplement (PMC1817633)
Supplement: 7601585s14.pdf [file 7601585s14.pdf]

**Supplementary Table S3** Primers used in this study

| Locus                        | Name         | Sequence                        | Source     |
|------------------------------|--------------|---------------------------------|------------|
| <i>ars2004</i>               | ars2004-66-F | 5'-CGGATCCGTAATCCCAACAA-3'      | This study |
|                              | ars2004-66-R | 5'-TTTGCTTACATTTTCGGGAACCTTA-3' |            |
| <i>ars2004-2<sup>a</sup></i> | ars2004-F-2  | 5'-AAAATGCCAACCCGTATTGAC-3'     | This study |
|                              | ars2004-66-R | 5'-TTTGCTTACATTTTCGGGAACCTTA-3' |            |
| <i>nonARS</i>                | nonARS-70-F  | 5'-TACGCGACGAACCTTGCATAT-3'     | This study |
|                              | nonARS-70-R  | 5'-TTATCAGACCATGGAGCCCATT-3'    |            |
| <i>AT2024<sup>b</sup></i>    | AT2024-115-F | 5'-GCGACGGAGATGTCCAGAAA-3'      | This study |
|                              | AT2024-115-R | 5'-TGCACATGCACAATACACACCTT-3'   |            |
| <i>AT2080<sup>b</sup></i>    | AT2080-71-F  | 5'-CGAACAACAGGCTTGGTTAGAA-3'    | This study |
|                              | AT2080-71-R  | 5'-GAAGTACGGACTTGTTCGATTCC-3'   |            |
| <i>dg</i>                    | dg-108-F     | 5'-TCCAAATGTCGCATGAACACTC-3'    | This study |
|                              | dg-108-R     | 5'-CTTTTTTGGGAATACATTGGGTTT-3'  |            |
| <i>cnt2</i>                  | cnt2-211-F   | 5'-GGTTTTATGATTTTGGCGAAGTG-3'   | This study |
|                              | cnt2-211-R   | 5'-CGACAAGCGTGGATTTATTTTATG-3'  |            |
| <i>telomere</i>              | telo2R-203-F | 5'-GACTACAGCCACAAGCTA-3'        | This study |
|                              | telo2R-203-R | 5'-CATTATGACTTCCAATCCCT-3'      |            |

<sup>a</sup>This primer set was only used for *ars2004/AT2080* strain in Fig. 5.

<sup>b</sup>Segurado *et al.*, 2003
